1 **Leptomeningeal anti-tumor immunity follows unique signaling principles**

2

3 Jan Remsik<sup>1</sup>, Xinran Tong<sup>1,2</sup>, Russell Z. Kunes<sup>3,4</sup>, Min Jun Li<sup>1,10</sup>, Ahmed Osman<sup>1</sup>, Kiana  
4 Chabot<sup>1,11</sup>, Ugur T. Sener<sup>5,12</sup>, Jessica A. Wilcox<sup>5</sup>, Danielle Isakov<sup>1,13</sup>, Jenna Snyder<sup>1,6</sup>, Tejus  
5 A. Bale<sup>7,8</sup>, Ronan Chaligné<sup>3</sup>, Dana Pe'er<sup>3,9</sup>, Adrienne Boire<sup>1,5,8,\*</sup>

6

7 <sup>1</sup> Human Oncology & Pathogenesis Program, Memorial Sloan Kettering Cancer Center, New  
8 York, NY 10065, USA

9 <sup>2</sup> BCMB Allied Program, Graduate School of Medical Sciences, Weill Cornell Medicine, New  
10 York, NY 10065, USA

11 <sup>3</sup> Program for Computational and Systems Biology, Sloan Kettering Institute, Memorial Sloan  
12 Kettering Cancer Center, New York, NY 10065, USA

13 <sup>4</sup> Department of Statistics, Columbia University, New York, NY 10027, USA

14 <sup>5</sup> Department of Neurology, Memorial Sloan Kettering Cancer Center, New York, NY 10065,  
15 USA

16 <sup>6</sup> Gerstner Sloan Kettering Graduate School of Biomedical Sciences, Memorial Sloan  
17 Kettering Cancer Center, New York, NY 10065, USA

18 <sup>7</sup> Department of Pathology and Laboratory Medicine, Memorial Sloan Kettering Cancer  
19 Center, New York, NY 10065, USA

20 <sup>8</sup> Brain Tumor Center, Memorial Sloan Kettering Cancer Center, New York, NY 10065, USA

21 <sup>9</sup> Howard Hughes Medical Institute, Memorial Sloan Kettering Cancer Center, New York, NY  
22 10065, USA

23

24 \* Corresponding author. Email address: [boirea@mskcc.org](mailto:boirea@mskcc.org)

25

26 <sup>10</sup> Present address: Medical Scientist Training Program, University of California San Diego,  
27 La Jolla, CA 92093, USA

28 <sup>11</sup> Present address: College of Osteopathic Medicine, New York Institute of Technology,  
29 Glen Head, NY 11545, USA

30 <sup>12</sup> Present address: Department of Neurology & Department of Medical Oncology, Mayo  
31 Clinic, Rochester, MN 55905, USA

32 <sup>13</sup> Present address: Tri-Institutional MD-PhD Program, Weill Cornell Medicine, New York, NY  
33 10065, USA

34 **Abstract** (170 words)

35

36 Metastasis to the cerebrospinal fluid (CSF)-filled leptomeninges, or leptomeningeal  
37 metastasis (LM), represents a fatal complication of cancer. Proteomic and transcriptomic  
38 analyses of human CSF reveal a substantial inflammatory infiltrate in LM. We find the solute  
39 and immune composition of CSF in the setting of LM changes dramatically, with notable  
40 enrichment in IFN- $\gamma$  signaling. To investigate the mechanistic relationships between immune  
41 cell signaling and cancer cells within the leptomeninges, we developed syngeneic lung,  
42 breast, and melanoma LM mouse models. Here we show that transgenic host mice, lacking  
43 IFN- $\gamma$  or its receptor, fail to control LM growth. Overexpression of *Ifng* through a targeted  
44 AAV system controls cancer cell growth independent of adaptive immunity. Instead,  
45 leptomeningeal IFN- $\gamma$  actively recruits and activates peripheral myeloid cells, generating a  
46 diverse spectrum of dendritic cell subsets. These migratory, CCR7<sup>+</sup> dendritic cells  
47 orchestrate the influx, proliferation, and cytotoxic action of natural killer cells to control  
48 cancer cell growth in the leptomeninges. This work uncovers leptomeningeal-specific IFN- $\gamma$   
49 signaling and suggests a novel immune-therapeutic approach against tumors within this  
50 space.

52 **Main Text** (5,375 words)

53

54 Metastasis, or spread of cancer to distant anatomic sites, requires cancer cells to enter into  
55 and thrive within microenvironments unlike those of the primary tumor. In parallel, immune  
56 cells migrate throughout the organism and enter these same microenvironments as a  
57 counter-offensive, carrying out complex cellular tasks to control the growth of disseminated  
58 malignant cells. This balance may tip in favour of cancer cell growth for a variety of reasons,  
59 most simply when immune cells are excluded, as is the case for the majority of metastases  
60 to the central nervous system. An important exception to this rule is that of leptomeningeal  
61 metastasis (LM). The leptomeninges, the cerebrospinal fluid (CSF)-filled protective  
62 coverings, encase the central nervous system. Cancer cell entry into the leptomeningeal  
63 space, or LM, provokes a profound inflammatory response<sup>1-3</sup>, clinically reminiscent of  
64 infectious meningitis<sup>4-6</sup>. Despite this abundance of immune cells and intense inflammatory  
65 signals, leptomeningeal cancer cells persist and even thrive, a reflection of inflammation-  
66 mediated transcriptional changes within these cancer cells<sup>1,4</sup>. How and why these abundant  
67 infiltrating inflammatory cells fail to control cancer cell growth remains enigmatic. Previous  
68 work has uncovered non-canonical transcriptional and functional changes in macrophages in  
69 the setting of metastasis, suggesting that other immune cells within this anatomical  
70 compartment may also behave atypically<sup>4</sup>. In addition, levels of inflammatory cytokines in  
71 the leptomeningeal space do not reflect those outside the leptomeninges, consistent with  
72 both intrathecal cytokine generation and alternative regulatory system(s) within this space<sup>7</sup>.  
73 Formal investigations of this complex, anatomically site-specific, call-and-response between  
74 immune cells and cancer cells have remained incomplete, due to the lack of  
75 immunocompetent mouse models<sup>1,8</sup> and to piecemeal computational approaches that do  
76 not encompass the entirety of cellular and humoral signalling within this under-appreciated  
77 anatomic space. To uncover the mechanisms whereby the immune system fails to control  
78 cancer cell growth in the leptomeningeal space, we comprehensively captured and  
79 molecularly dissected the immune response to LM in human disease and novel  
80 immunocompetent mouse models at both the cellular and humoral levels.

## 81 **Results**

82

### 83 **Leptomeningeal metastasis generates an inflamed milieu**

84

85 LM is a uniformly fatal neurologic consequence of cancer. Although any malignancy can  
86 result in LM, it most commonly results from breast, lung and melanoma primaries<sup>9</sup>. Cancer  
87 cells enter into the leptomeningeal space accompanied by a host of leukocytes, as can be  
88 appreciated by classical techniques including CSF cytospins (**Fig.1 A**). To understand this  
89 leukocytic pleocytosis at a molecular level, we profiled CSF collected from breast and lung  
90 cancer patients with (n = 5) and without (n = 3) LM using the 10X platform, collecting single  
91 cell transcriptomes, assigning cell identity by clustering and marker gene expression (**Fig.**  
92 **1B and fig. S1**). In the absence of LM, the CSF is nearly acellular and contains  
93 predominantly CD4<sup>+</sup> T cells (**Fig. 1, A to C, and fig. S1**). Pathological processes that do not  
94 directly involve the leptomeninges, such as parenchymal or dural metastases, remodel the  
95 CSF cell landscape towards reactive myeloid cells (**fig. S1, D to F**). CSF from patients  
96 harboring LM was pleocytic and contained cells from a spectrum of lymphoid and myeloid  
97 lineages. To assess the molecular hallmarks of CSF pleocytosis and capture cell-to-cell  
98 communication, we subjected CSF from patients with breast cancer, lung cancer, and  
99 melanoma primaries, with and without LM, to targeted proteomic analysis by proximity  
100 extension assay (**fig. S2, A to C, and tables S1 to 3**)<sup>9</sup>. In the presence of LM, CSF  
101 demonstrated a robust influx of soluble inflammatory ligands; 15 of these molecules were  
102 shared across the three tumor types (**fig. S2D**). Extending this cohort to include patients with  
103 a wide variety of solid tumor primaries confirmed elevated CSF levels of IFN- $\gamma$  in the  
104 presence of LM (**Fig. 1D**). Moreover, elevated CSF IFN- $\gamma$  levels at diagnosis were  
105 associated with improved overall survival (**Fig. 1E**). IFN- $\gamma$  is well-known to exhibit both pro-  
106 tumorigenic and tumor-suppressive actions in a context-dependent manner; the presence of  
107 inflammatory and anti-inflammatory signals in cancer-infiltrated leptomeninges suggested a  
108 dense signaling network not clearly consistent with monotone behavior and canonical  
109 pathways. We therefore pursued formal identification of downstream leptomeningeal  
110 effectors of IFN- $\gamma$  and the functional consequence(s) of their activation.

111

### 112 **Interferon- $\gamma$ regulates leptomeningeal metastatic growth**

113

114 To enable these mechanistic studies, we leveraged iterative *in vivo* selection to generate six  
115 immunocompetent mouse LeptoM lines on two genetic backgrounds (**fig. S3A**)<sup>1</sup>. These cell  
116 lines, subpopulations of the founding parental line, are phenotypically and transcriptomically



117 distinct from their parental or brain parenchyma-tropic counterparts (**fig. S3, B to M**).  
118 Moreover, these LeptoM models faithfully recapitulate key histological and oncological  
119 features of human LM including CSF pleocytosis (**Fig. 2A**) and brisk pace of illness (**fig. S3,**  
120 **B to M**). To capture the complexity of leptomeningeal immune infiltrate at systems level, we  
121 performed proteogenomic analysis of mouse leptomeningeal immune infiltrate with 198  
122 barcoded antibodies targeting cell surface epitopes and non-targeting isotype controls,  
123 coupled with single cell RNA-sequencing on the 10X platform; single-cell CITE-seq<sup>10</sup>. This  
124 approach enables granular identification of immune cell subtypes and their origin. The  
125 mouse models mimic human CSF cellular composition in the setting of LM: a dramatic influx  
126 of leukocytes is observed, evenly split between myeloid and lymphoid populations (**Fig. 2, B**  
127 **and C, and fig. S4**, compare **Fig. 1 B and C, and fig S1E**). In both human and mouse LM,  
128 the myeloid compartment is populated by monocyte-macrophages, and to a lesser extent,  
129 dendritic cells (DCs) (**fig. S1E, and fig S4**). In the absence of LM, normal human CSF is T-  
130 cell predominant, whereas disease-free mouse leptomeninges are populated by B cells and  
131 neutrophils. Despite species-specific differences in the in the absence of malignancy, the  
132 presence of LM drives the CSF cellular composition to a common, myeloid-dominant  
133 pleocytosis, independent of vertebrate host.

134

135 In light of this myeloid predominance, we investigated leptomeningeal IFN- $\gamma$  signaling<sup>11</sup>. We  
136 detected elevated levels of IFN- $\gamma$  in mouse LM, compared to vehicle-injected animals (**Fig.**  
137 **2D**), analogous to human disease (**Fig. 1D**). To identify its source, we subjected CSF  
138 collected from mice with and without LM to flow cytometric assessment of IFN- $\gamma$  production  
139 (**fig. S5A**). We find that leptomeningeal T and NK cells produce IFN- $\gamma$ . In parallel, we  
140 queried our human and mouse single-cell atlases for *IFNG* transcript. In both mouse and  
141 human leptomeninges, T cells and NK cells produce IFN- $\gamma$  (**fig. S5B**). Because IFN- $\gamma$  binding  
142 to its cognate receptors triggers a signaling cascade that results in phosphorylation of  
143 STAT1 (pSTAT1)<sup>12</sup>, we assessed the levels of pSTAT1 in leptomeningeal immune infiltrates  
144 by flow cytometry. We detected increased levels of pSTAT1 in mouse leptomeningeal  
145 dendritic cells, monocyte-macrophages, and T cells, but not natural killer (NK) cells (**fig.**  
146 **S5C**). Taken together, these results support a model whereby leptomeningeal monocyte-  
147 macrophages, dendritic cells and T cells respond to IFN- $\gamma$  generated by leptomeningeal T  
148 and NK cells. To assess the contributions of IFN- $\gamma$  signaling to leptomeningeal cancer  
149 growth, we leveraged transgenic host mice lacking either the sole type II Interferon ligand,  
150 *Ifng*, or its receptor, *Ifngr1*, resulting in whole-body impairment of IFN- $\gamma$  signaling<sup>13,14</sup>. In both  
151 transgenic hosts and the three tested LM models, interruption of IFN- $\gamma$  signaling led to  
152 uncontrolled cancer cell growth in the leptomeninges (**Fig. 2, E and F, and fig. S6**). This

153 effect was not observed when these LeptoM cells were orthotopically implanted in their  
154 primary sites or the subcutaneous tissues (**fig. S7**), consistent with a leptomeningeal-  
155 specific role for IFN- $\gamma$ .

156

157 In a context-dependent fashion, IFN- $\gamma$  may either promote or inhibit cancer growth. This can  
158 be the result of direct IFN- $\gamma$  signal to the cancer cell, or indirect signaling to the tumor  
159 microenvironment. To investigate whether IFN- $\gamma$  acts directly on cancer cells and suppresses  
160 their growth *in vivo*, we next genetically abrogated IFN- $\gamma$  signaling in cancer cells by  
161 knocking out the *Ifngr2* subunit of IFN- $\gamma$  receptor with CRISPR/Cas9. Unlike control clones,  
162 these knock-out lines were unable to propagate IFN- $\gamma$  response that normally leads to  
163 upregulation of MHC class I on the cell surface (**fig. S8, A to C**). The lack of *Ifngr2* in these  
164 cells did not alter their growth *in vitro* (**fig. S8, D to F**), or *in vivo* (**fig. S8, G to I**). Cancer-  
165 intrinsic IFN- $\gamma$  signaling is thus not required for cancer cell survival in the leptomeninges.  
166 Therefore, IFN- $\gamma$  mediates leptomeningeal cancer cell growth through indirect effects on the  
167 microenvironment. Because knockout of host IFN- $\gamma$  promoted cancer cell growth, we  
168 pursued a complementary add-back strategy with weekly intra-cisternal introduction of  
169 recombinant mouse IFN- $\gamma$ . While LeptoM cancer cells demonstrate capacity to receive  
170 receive IFN- $\gamma$  signals (**fig. S9, A to D**), this does not significantly impact their proliferation *in*  
171 *vitro* (**fig. S9, D to F**). However, *in vivo*, addition of IFN- $\gamma$  suppressed cancer cell growth  
172 within the leptomeninges (**fig. S9, F to J**). Thus, IFN- $\gamma$  suppressed intrathecal cancer cell  
173 growth in an indirect fashion, suggesting an interplay between IFN- $\gamma$  and other cells in this  
174 inflammatory microenvironment.

175

### 176 **Leptomeningeal interferon- $\gamma$ tumor suppression is independent of antigen** 177 **presentation**

178

179 To uncover the downstream IFN- $\gamma$  effectors in the context of LM, we designed an  
180 experimental system enabling manipulation of CSF composition without frequent anesthesia  
181 or injection of foreign agents into the leptomeninges. We constructed an adeno-associated  
182 viral (AAV)-based expression system to induce expression of exogenous *Ifng* or a control  
183 gene, *Egfp*, specifically in the mouse leptomeninges<sup>15,16</sup>, (**fig. S10, A to B**). With this  
184 technique, overexpressed leptomeningeal IFN- $\gamma$  resulted in dramatic control of  
185 leptomeningeal metastatic cancer cell growth in all six syngeneic LeptoM models;  
186 overexpressed EGFP did not (**Fig 3, A to F, and fig. S10, C to H**). Importantly, this  
187 overexpression system did not result in neurodegeneration or neuroinflammation, as in the

188 case of Type I Interferons<sup>17</sup>. Indeed, we observed a normal profile of astrocytes lining the  
189 ventricular space, without apparent activation of parenchymal microglia, depletion of neural  
190 progenitors, change in neuronal tract distribution, or change in mature cortical neuron  
191 numbers (**fig. S11**). Similar to earlier reports, we detected a decrease in the immature  
192 oligodendrocyte population in *corpus callosum*<sup>18,19</sup>. This was not reflected in cortical and  
193 subcortical layers where we detected only a minor decrease in differentiated, CNPase-  
194 positive cortical and subcortical oligodendrocytes (**fig. S12**).

195

196 With this tool in hand, we set to identify the key cell population(s) responsible for IFN- $\gamma$ -  
197 dependent cancer control in the leptomeninges. The anti-cancer effect of IFN- $\gamma$  was  
198 diminished when this IFN- $\gamma$  overexpression system was established in fully immunodeficient  
199 NSG mice, confirming that immune cells mediate IFN- $\gamma$ 's anti-cancer activity in the  
200 leptomeninges (**Fig. 3G, and fig. S13, A to C**). IFN- $\gamma$  positively regulates antigen  
201 presentation<sup>12</sup>. It was therefore surprising to observe the IFN- $\gamma$  anti-tumor effect was  
202 preserved in *Rag1*-deficient animals with impaired adaptive immune system, indicating that  
203 IFN- $\gamma$ 's anti-tumor function is independent of antigen presentation in the leptomeninges (**Fig.**  
204 **3H, and fig. S13, D to F**). Iba1<sup>+</sup> monocytes and macrophages are well-known IFN- $\gamma$   
205 effectors<sup>12</sup>. Overexpression of *Ifng* resulted in accumulation of Iba1<sup>+</sup> myeloid cells in the  
206 choroid plexus (**Fig. 3I**), a structure that acts as an interface between the periphery and the  
207 leptomeninges, produces the majority of CSF, and serves as a gateway for immune cell  
208 entry<sup>20,21</sup>. In our system, neither antibody-based, nor chemical depletion of monocyte-  
209 macrophage population resulted in impaired tumor growth control by IFN- $\gamma$  (**Fig. 3J, and fig.**  
210 **S13, G and H**). IFN- $\gamma$ -mediated leptomeningeal tumor control is thus dependent on the  
211 immune system, but independent of an antigen presentation, adaptive immunity, and  
212 monocyte-macrophage function. We therefore turned our attention to leptomeningeal  
213 dendritic cells.

214

### 215 **Dendritic cells orchestrate innate anti-tumor immune response in the leptomeninges**

216

217 Conventional DCs (cDC) are a professional phagocytic myeloid immune cell lineage that can  
218 propagate IFN- $\gamma$  response. Their function in an antigen-independent setting is, however, less  
219 explored. To specifically deplete the cDC lineage in the mouse and clarify their role in LM,  
220 we took advantage of a transgenic line that expresses human diphtheria toxin receptor  
221 (DTR) under the control of endogenous mouse *Zbtb46*<sup>22</sup>. Within the hematopoietic  
222 compartment the ZBTB46 expression is restricted specifically to cDC progenitors, it is also  
223 expressed by other body cell types, such as endothelium. To avoid consequences related to

224 systemic depletion of ZBTB46-expressing cells, we generated bone marrow chimeras: We  
225 infused lethally irradiated wild-type recipient mice with bone marrow from wild-type or  
226 ZBTB46-DTR animals. In this scenario, diphtheria toxin (DTx) eliminates ZBTB46-  
227 expressing cDC progenitors (**fig. S14**), while retaining the normal function of other, non-  
228 hematopoietic cell types. After reconstitution of normal bone marrow function, we  
229 overexpressed leptomeningeal *Ifng* or *Egfp*, and introduced cancer cells. Introduction of DTx  
230 into wild-type chimera hosts did not alter the activity of IFN- $\gamma$ ; mice with ablated cDC  
231 demonstrated reduced IFN- $\gamma$ -dependent tumor control (**Fig. 4A**). These experiments  
232 suggested that leptomeningeal DCs, responding to IFN- $\gamma$  (**fig. S5C**), mediate its anti-tumor  
233 action.

234

235 To capture the complexity of the IFN- $\gamma$  response in the leptomeningeal space at a systems  
236 level, we isolated leptomeningeal cells from *Egfp*- and *Ifng*-overexpressing mice in the  
237 presence and absence of LM, and profiled these cells with CITE-seq (**fig. S15**; total n = 24  
238 mice from 4 conditions). We confirmed the presence of all classical DC populations: cDCs1  
239 and cDCs2, migratory CCR7+ DCs, and plasmacytoid DCs (pDCs; **Fig. 4B and C**).  
240 Molecular profiling of DCs isolated from *Egfp*- and *Ifng*-overexpressing mice revealed  
241 striking similarities between mouse and human leptomeningeal DCs (**fig. S16**), as well as  
242 site-specific (leptomeningeal) imprinted expression patterns different from those observed  
243 within extracranial sites<sup>23,24</sup>. In the presence of cancer, or after IFN- $\gamma$  induction, cDC  
244 populations accumulate within the leptomeninges (**fig. S17, A to C**). To address IFN- $\gamma$ -  
245 dependent relationships between these cDC populations, we queried our proteogenomic  
246 atlas. Outside of the CNS, CCR7+ DCs can arise from both cDC1 and cDC2 populations<sup>25</sup>.  
247 The majority of leptomeningeal CCR7+ DCs, however, retained of the cDC2 surface  
248 expression profile, as detected with CITE-seq (**fig. S17, D and E**). Given the  
249 leptomeningeal-specific expression pattern, we elected to approach this computationally and  
250 first employed CellRank to predict terminal cell states, without the need to indicate the initial  
251 cell (**fig. S17F**)<sup>26</sup>. This analysis identified cDC2 cells as the major contributors to the  
252 leptomeningeal CCR7+ DC pool; it also identified CCR7+ DCs as predominantly a product of  
253 cDC2 maturation (**fig. S17, G and H**). We then reproduced trajectory analyses with Palantir,  
254 modeling the cDC2-CCR7+ DC maturation axis (**fig. S17, I and J**)<sup>27</sup>. We detected  
255 enrichment of IFN- $\gamma$ -associated genes as cells transition to CCR7+ DCs, consistent with  
256 IFN- $\gamma$  contribution to CCR7+DC maturation from cDC2 cells (**Fig. 4D**)<sup>28</sup>. Because the anti-  
257 tumor effect of leptomeningeal IFN- $\gamma$  does not rely on antigen presentation, we examined  
258 other anti-tumor pathways including cancer cell proliferation and death. Prediction of cell  
259 cycling in transcriptomic cancer cell data revealed that cancer cells isolated from *Ifng*-

260 overexpressing mice did not show defective proliferation (**Fig. 4, E and F, and fig. S18, A to**  
261 **C**). However, immunofluorescence of cancer cells in the leptomeninges identified elevated  
262 caspase expression in the *Ifng*-overexpressing animals, consistent with apoptotic cell death  
263 (**Fig. 4G and fig. S18, D to F**). These results suggested that a cytotoxic immune population,  
264 supported by cDCs, restricts cancer cell expansion in the leptomeninges.

265

### 266 **Dendritic cell-generated cytokines drive proliferation of leptomeningeal NK cells**

267

268 We therefore turned our attention to the transcriptomic profiles of leptomeningeal NK cells,  
269 cytotoxic effectors capable of tumor cell killing<sup>29</sup>. Mouse leptomeninges contained naïve,  
270 activated, and proliferating NK cells. In the presence of cancer, a minor population of  
271 senescent NK cells was also apparent (**Fig. 5, A and B, and fig. S19, A to C**). Human CSF  
272 demonstrated analogous populations of naïve-like and activated-like NK cells (**fig. S19, D to**  
273 **G**). Independent of cancer, leptomeningeal *Ifng* overexpression induced increased NK cell  
274 proliferation; this effect was retained in NK cells isolated from *Ifng* overexpressing cancer-  
275 bearing animals (**Fig. 5C**).

276

277 We next examined communication between leptomeningeal CCR7+ DCs and NK cells. As  
278 determined by CITE-seq, mouse leptomeningeal CCR7+ DCs specifically produced IL12  
279 and IL15, two cytokines that promote survival and proliferation of NK cells; leptomeningeal  
280 NK cells expressed their cognate receptors (**Fig. 5D**). To examine this putative cell-cell  
281 communication, we cultured mouse splenic NK cells in human CSF isolated from patients  
282 without LM. CSF represents a notoriously nutrient-sparse environment with minimal growth  
283 factors<sup>30</sup>. Within CSF, naïve splenic NK cell survival was impaired; this effect was rescued  
284 by the addition of recombinant mouse IL12 and IL15 (**Fig. 5E**). Mirroring findings in our  
285 mouse models, we detected increased levels of NK cell-supporting cytokines in the CSF  
286 from patients harboring LM (**Fig. 5F**), as well as transcripts of their receptors in human  
287 leptomeningeal NK cells (**Fig. 5G**). To demonstrate the role of NK cells in IFN- $\gamma$ -dependent  
288 cancer control, we depleted NK cells in mice overexpressing *Ifng* in our AAV5 system (**fig.**  
289 **S10, A and B**). As expected, we observed control of tumor growth and extended survival in  
290 mice treated with control antibody in the presence of leptomeningeal IFN- $\gamma$  (**Fig. 5H, and fig.**  
291 **S20**). This phenotype was abolished in mice with antibody-depleted NK cells, supporting a  
292 model whereby NK cells serve as the leptomeningeal effector cells in the context of IFN- $\gamma$ .  
293 We next depleted NK cells in *Ifngr1*<sup>-/-</sup> host mice. In this epistasis experiment, NK cell  
294 depletion in mice with non-functional IFN- $\gamma$  signaling did not further accelerate  
295 leptomeningeal cancer cell growth, confirming that IFN- $\gamma$  signaling precedes NK cell-

296 dependent cancer elimination (**Fig. 5I**). We uncovered evidence of NK cell activation in  
297 human LM in the form of elevated levels of granzyme A, perforin, granulysin, and sFas as  
298 well as enrichment of activated NK cells in the CSF of LM patients (**Fig. 5J and fig. S19, D**  
299 **and F**). Taken together, our data are consistent with a model whereby NK cell- and T cell-  
300 derived leptomeningeal IFN- $\gamma$  acts on cDCs, supporting their maturation into CCR7+ DCs.  
301 These cells then produce a spectrum of lymphocyte-supporting cytokines, promoting NK cell  
302 proliferation and anti-leptomeningeal tumor action (**Fig. 6**).



## 303 Discussion

304

305 We have defined the molecular interactions between metastatic cancer and immune cells  
306 within the leptomeninges. To capture this complex oncologic ecosystem, we have employed  
307 single cell transcriptional and proteomic profiling of clinical samples. In doing so, we  
308 identified IFN- $\gamma$  as a key mediator of anti-cancer response within the leptomeninges. To  
309 mechanistically dissect the growth suppressive action of leptomeningeal IFN- $\gamma$ , we  
310 generated several new immunocompetent animal models of LM. We found that although  
311 leptomeningeal IFN- $\gamma$  attracts myeloid cells into the leptomeningeal space, it does not  
312 promote anti-tumor activity in the macrophage population. Rather, leptomeningeal IFN- $\gamma$   
313 targets dendritic cells, promoting cDC2 maturation. Surprisingly, these dendritic cells  
314 orchestrate anti-cancer activity in an antigen-independent manner, generating cytokine  
315 signals to support the cytotoxic action of natural killer cells.

316

317 LM represents a fundamentally inflammatory pathology. Indeed, LM was originally described  
318 as a “carcinomatous meningitis”, reflecting the characteristic abundant immune infiltrate and  
319 the purulent exudate found at autopsy<sup>31,32</sup>. Recent work demonstrates that certain aspects  
320 of leptomeningeal inflammation can support cancer cell growth: Cancer cells within the  
321 leptomeningeal space respond to IL-8 and IL-6 to transcribe the iron binding and iron  
322 transport genes LCN2 and SLC22A17<sup>4</sup>; Cancer cell-generated complement C3 disrupts the  
323 blood-CSF-barrier to enrich the CSF and support cancer cell growth in the space<sup>1</sup>.  
324 However, inflammatory signaling in the leptomeninges does not universally support LM. In  
325 this report, we have uncovered leptomeningeal inflammatory signaling that can interrupt  
326 cancer cell growth: IFN- $\gamma$ . We identified elevation of leptomeningeal IFN- $\gamma$  as a hallmark of  
327 LM-induced pleocytosis across multiple tumor types. Moreover, higher CSF IFN- $\gamma$  at  
328 diagnosis portends a more favorable prognosis for these patients.

329

330 IFN- $\gamma$  is a classical tumor suppressive cytokine derived predominantly by Th1 CD4+ T cells,  
331 as well as CD8+ T cells, NK cells, NKT cells, and minor population of other immune cell  
332 types<sup>33</sup>. Investigation of IFN- $\gamma$  within the leptomeningeal space revealed anatomically  
333 distinct features: the proportion of immune cells expressing this protein, or its transcript,  
334 appeared to be insufficiently low even at in the absence of malignancy, suggesting that the  
335 leptomeninges actively maintain low production of this pleiotropic cytokine, possibly to  
336 impede neurotoxicity interferon ligands<sup>7,17</sup>. IFN- $\gamma$  stimulates the recruitment of a wide variety  
337 of immune cell types into the tumor microenvironment, particularly through the upregulation  
338 of CXC chemokines CXCL9, -10, and -11<sup>33</sup>. The impressive pleocytosis in LM patients and

339 experimental animal models can be, to some extent, explained by accumulation of these  
340 IFN- $\gamma$ -regulated chemokines. However, both CC and CXC chemokines are dramatically  
341 elevated in the leptomeninges of patients harboring systemic inflammation or prolonged  
342 COVID-19, yet their accumulation does not necessarily result in clinically relevant CSF  
343 pleocytosis, suggesting additional level of immune cell entry control into the CSF<sup>2,4,7,34</sup>. Why  
344 CSF IFN- $\gamma$  and its downstream ligands do not consistently result in leptomeningeal  
345 accumulation of immune cells remains an open question.

346

347 In immunocompetent settings, IFN- $\gamma$  prevents the establishment of spontaneous and  
348 chemically-induced tumors by enhancing cancer cell recognition, increasing antigen  
349 processing via MHC class I and II in the extracranial sites and brain<sup>35-37</sup>. Unlike other  
350 anatomic compartments, the tumor-suppressive role of IFN- $\gamma$  within the leptomeninges was  
351 unexpectedly independent of both the adaptive immune system and monocyte-  
352 macrophages. Instead, leptomeningeal DCs represent the essential IFN- $\gamma$  target. Our  
353 systems-level approach suggests that metastasis renders the leptomeningeal space an  
354 unusually dendritic cell-rich environment, when compared to extracranial sites with relatively  
355 sparse proportion of infiltrating dendritic cells. Indeed, cytometric analysis of STAT1  
356 phosphorylation in the presence of LM was most apparent in DCs. Moreover, single-cell  
357 proteogenomic analysis of leptomeningeal DCs further suggested a previously  
358 underappreciated role of IFN- $\gamma$ : cDC maturation into CCR7+, migratory dendritic cells.  
359 Trajectory analysis of mouse cDCs support the assertion that these CCR7+ DCs are  
360 predominantly a product of cDC2 maturation. In other, extracranial tumors, both cDC1 and  
361 cDC2 equally contribute to the migratory DC pool<sup>25</sup>. In antigen-independent settings, these  
362 migratory DCs produce an array of immune cell pro-survival and proliferation factors. In the  
363 harsh leptomeningeal environment, these DC-generated signals are necessary to sustain  
364 effector cell viability and activation. Indeed, we show that NK cells proliferate more in the  
365 setting of *Ifng* overexpression, and that this is supported by the presence of migratory DC-  
366 derived signals including IL12 and IL15.

367

368 Improved understanding of LM specific cancer cell-immune cell interactions suggests novel  
369 approaches to immune-oncology within the CNS and prompts a more nuanced view of the  
370 immune system in the leptomeningeal space. Our findings demonstrate that leptomeningeal  
371 metastatic cancer cell growth is largely controlled by the innate immune system. This may  
372 explain disappointing outcomes in LM-focused clinical trials targeting adaptive immunity<sup>38-40</sup>.  
373 We propose that DC and NK cell-engaging therapies - both already showing promising



374 clinical results in solid tumors and especially hematologic malignancies - may act as more  
375 rational strategies to control of this bleak complication of cancer <sup>41,42</sup>.

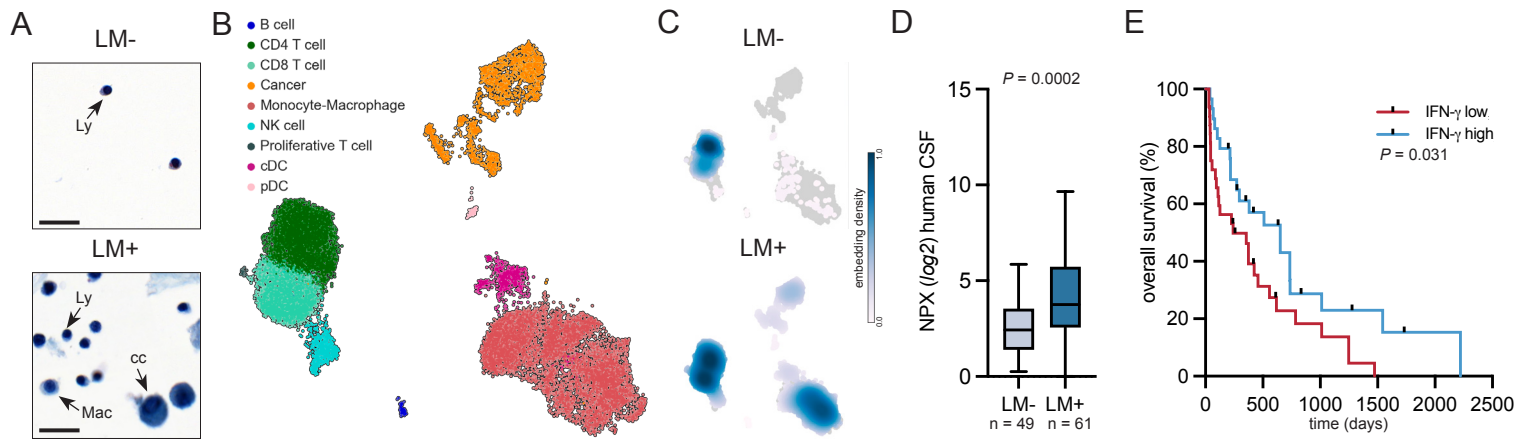

376 **Fig. 1. Inflammation-induced pleocytosis in patients with leptomeningeal metastasis**

377

378 (A) Representative images of Giemsa-stained cytopspins from cancer patients without (top)  
379 and with leptomeningeal metastasis (LM, bottom) with major cell populations indicated as Ly  
380 - lymphocyte, Mac - monocyte-macrophage, cc - cancer cell (n = 5 per group, scale bar = 20  
381  $\mu\text{m}$ ).

382

383 (B) UMAP projection of human CSF immune cell types and cancer cells, isolated from  
384 cancer patients without (n = 3 patients and n = 1,196 cells) and with (n = 5 patients and n =  
385 16,022 cells) LM. LM+ samples were retrieved from GSE150660 and colored by cell type<sup>4</sup>.  
386 See also fig. S1 and Methods for experimental overview, cell type annotations, and quality  
387 control plots.

388

389 (C) Embedding density plots from LM- and LM+ patients, showing relative cell type  
390 abundance per condition, projected onto UMAP.

391

392 (D) Relative CSF IFN- $\gamma$  levels in cancer patients with or without LM from wide array of solid  
393 tumors, as determined by proximity extension assay (LM- n = 49, LM+ n = 61). NPX -  
394 normalized protein expression. See also fig. S2.

395

396 (E) Kaplan-Meier plot showing, post-LM diagnosis survival in relation to CSF IFN- $\gamma$  levels at  
397 diagnosis. Logrank test (IFN- $\gamma$  high n = 29; IFN- $\gamma$  low n = 32; cut-off NPX = 4).

398

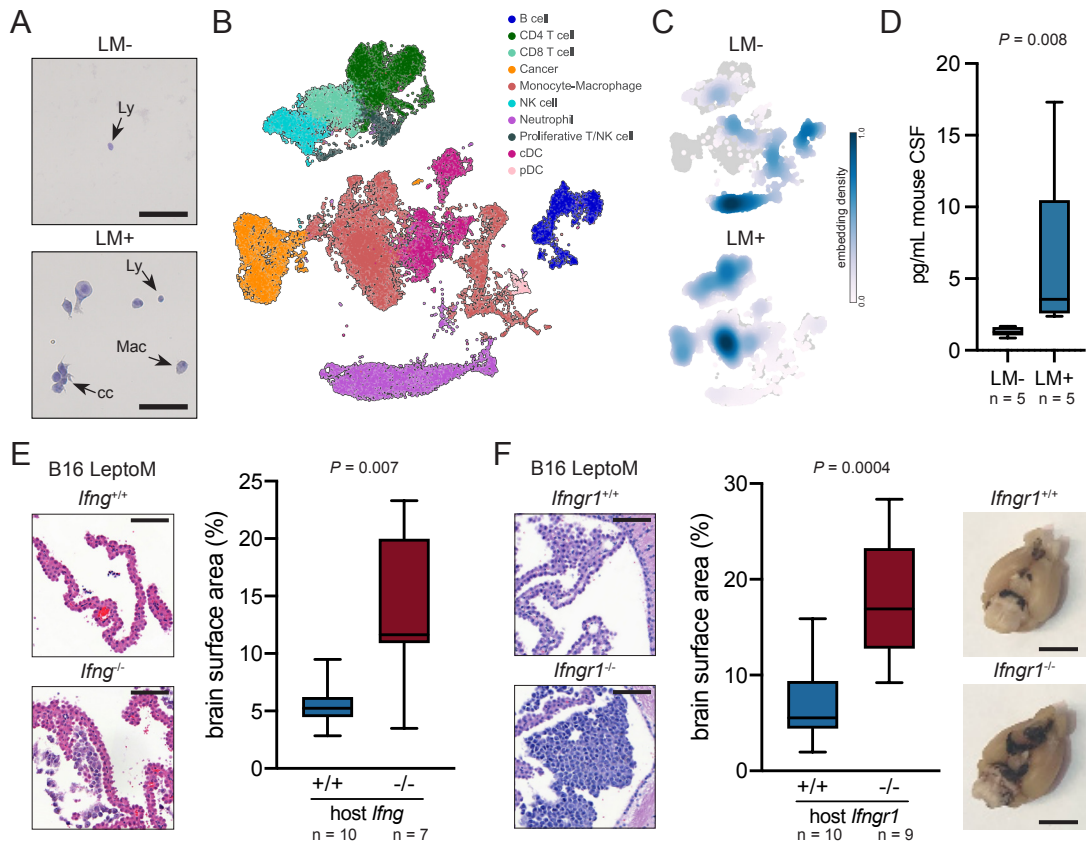

399 **Fig. 2. Host IFN- $\gamma$  signaling suppresses expansion of immunocompetent mouse LM**  
400 **cells**

401

402 (A) Representative images of hematoxylin-stained cytopins from vehicle- (top) and E0771  
403 LeptoM-injected mice (bottom) with major cell populations indicated as Ly - lymphocyte, Mac  
404 - monocyte-macrophage, cc - cancer cell ( $n = 3$  *per* group, scale bar = 50  $\mu\text{m}$ ). See fig. S3  
405 for characterization of immunocompetent LeptoM mouse lines.

406

407 (B) UMAP of cellular material isolated from vehicle- and LLC LeptoM-injected mice two  
408 weeks after inoculation, subjected to single-cell proteogenomic profiling with 10x CITE-seq  
409 ( $n = 7,528$  cells from vehicle-injected and  $n = 19,534$  cells from LLC LeptoM-injected mice,  $n$   
410 = 6 animals *per* group). Cell type annotations are provided in fig. S4, and experiment  
411 overview is provided in fig. S15.

412

413 (C) Embedding density plots from LM- and LM+ mice, showing relative cell type abundance  
414 *per* condition, projected onto UMAP.

415

416 (D) Levels of IFN- $\gamma$  in the CSF collected from naïve or LeptoM-bearing mice, detected by  
417 cytometric bead array.

418

419 (E) Representative leptomeningeal tissue sections stained with H&E (scale bar = 100  $\mu\text{m}$ ).  
420 Box plot illustrates brain surface area covered with pigmented B16 LeptoM cells delivered  
421 intracisternally into C57BL/6 *Ifng*-proficient and -deficient animals, quantified two weeks after  
422 injection.

423

424 (F) Representative leptomeningeal tissue sections stained with H&E (scale bar = 100  $\mu\text{m}$ ).  
425 Box plot illustrates brain surface area covered with pigmented B16 LeptoM cells delivered  
426 intracisternally into C57BL/6 *Ifngr1*-proficient and -deficient animals, quantified two weeks  
427 after injection. Photographs show the involvement of mouse basilar meninges with plaques  
428 of B16 LeptoM melanoma cells (scale bar = 5 mm).

429

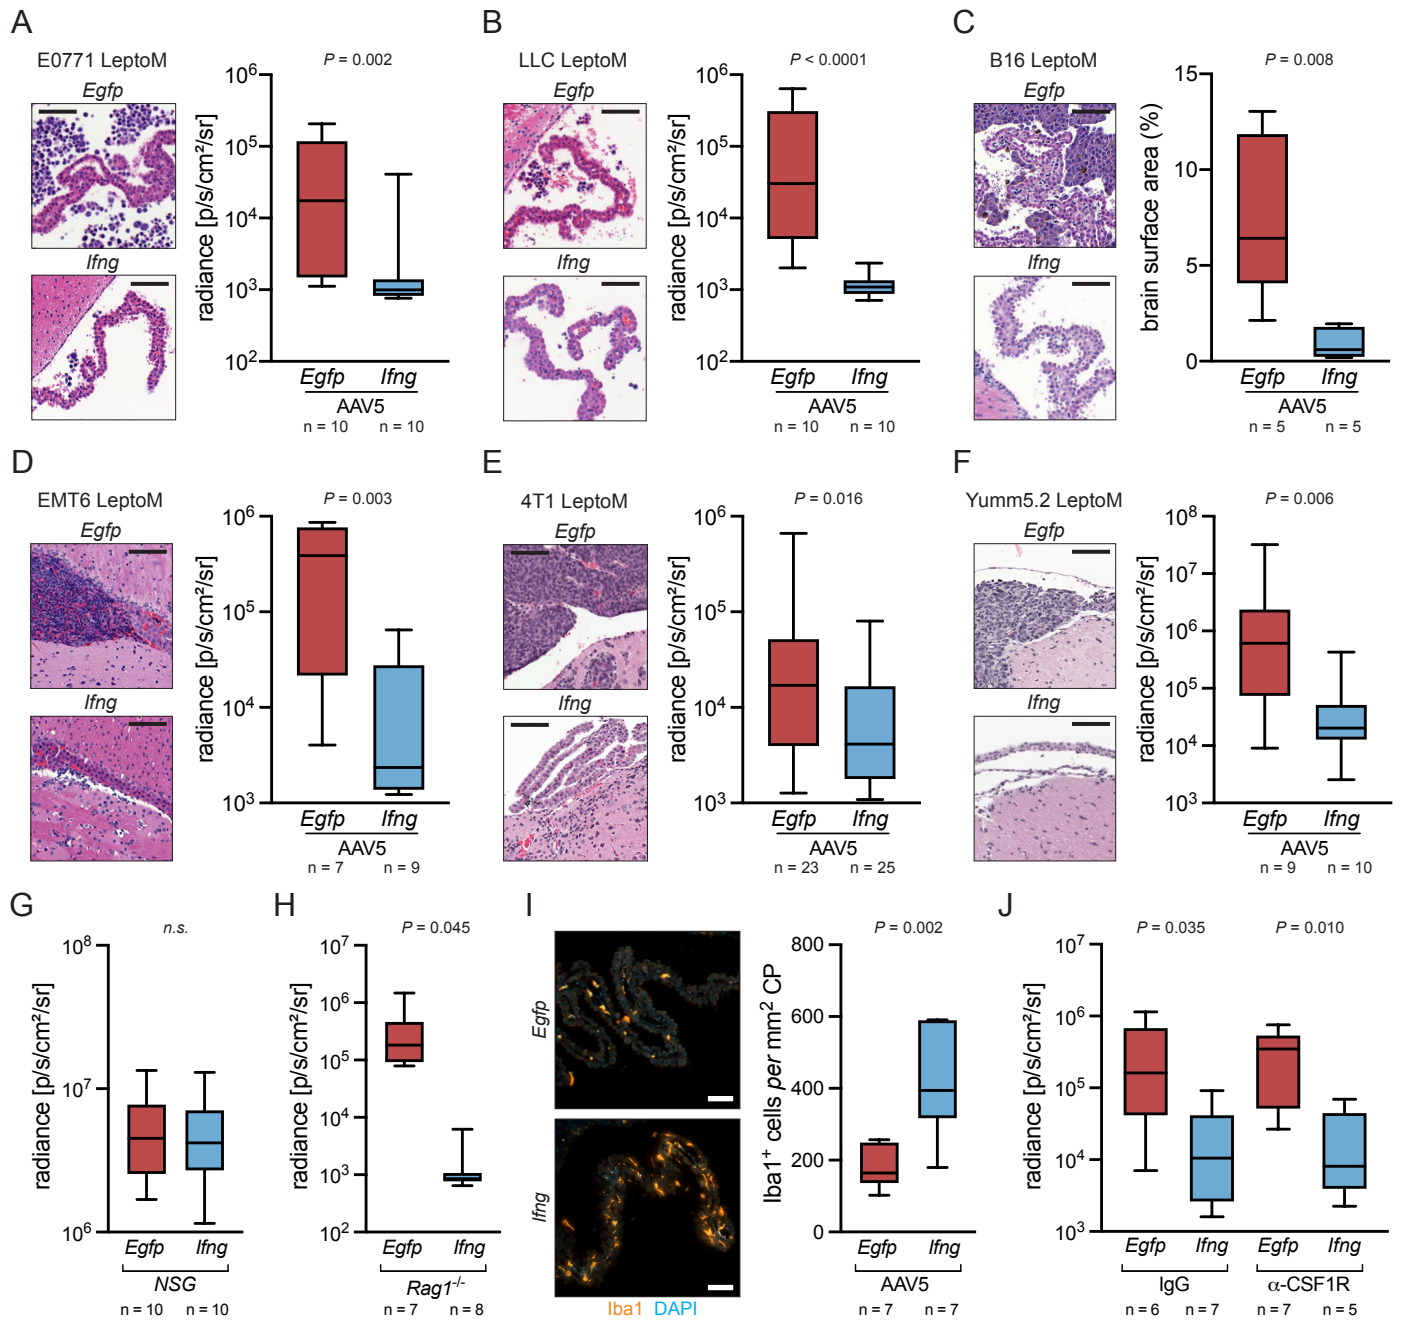

430 **Fig. 3. IFN- $\gamma$  controls the growth of metastatic cancer in leptomeninges independent**  
431 **of the adaptive immune system and monocyte-macrophages**

432

433 (A) Representative leptomeningeal tissue sections stained with H&E (scale bar = 100  $\mu$ m).  
434 Box plot illustrates *in vivo* radiance of E0771 LeptoM cells delivered intracisternally into  
435 C57Bl/6-*Tyr<sup>c-2</sup>* animals overexpressing *Egfp* or *Ifng* in the leptomeninges, quantified two  
436 weeks after injection.

437

438 (B) Representative leptomeningeal tissue sections stained with H&E (scale bar = 100  $\mu$ m).  
439 Box plot illustrates *in vivo* radiance of LLC LeptoM cells delivered intracisternally into  
440 C57Bl/6-*Tyr<sup>c-2</sup>* animals overexpressing *Egfp* or *Ifng* in the leptomeninges, quantified two  
441 weeks after injection.

442

443 (C) Representative leptomeningeal tissue sections stained with H&E (scale bar = 100  $\mu$ m).  
444 Box plot illustrates brain surface area covered with pigmented B16 LeptoM cells delivered  
445 intracisternally into C57BL/6 animals overexpressing *Egfp* or *Ifng* in the leptomeninges,  
446 quantified two weeks after injection.

447

448 (D) Representative leptomeningeal tissue sections stained with H&E (scale bar = 100  $\mu$ m).  
449 Box plot illustrates *in vivo* radiance of EMT6 LeptoM cells delivered intracisternally into  
450 BALB/c animals overexpressing *Egfp* or *Ifng* in the leptomeninges, quantified two weeks  
451 after injection.

452

453 (E) Representative leptomeningeal tissue sections stained with H&E (scale bar = 100  $\mu$ m).  
454 Box plot illustrates *in vivo* radiance of 4T1 LeptoM cells delivered intracisternally into BALB/c  
455 animals overexpressing *Egfp* or *Ifng* in the leptomeninges, quantified one week after  
456 injection.

457

458 (F) Representative leptomeningeal tissue sections stained with H&E (scale bar = 100  $\mu$ m).  
459 Box plot illustrates *in vivo* radiance of Yumm5.2 LeptoM cells delivered intracisternally into  
460 C57Bl6-*Tyr<sup>c-2</sup>* animals overexpressing *Egfp* or *Ifng* in the leptomeninges, quantified three  
461 weeks after injection.

462

463 (G) *In vivo* radiance of LLC LeptoM cells delivered intracisternally into NSG animals  
464 overexpressing *Egfp* or *Ifng* in the leptomeninges, quantified two weeks after injection. (NSG  
465 - non-obese, diabetic, severe combined immunodeficient, *Il2rg<sup>null</sup>*).

466

467 (H) *In vivo* radiance of LLC LeptoM cells delivered intracisternally into Rag1-deficient  
468 animals overexpressing *Egfp* or *Ifng* in the leptomeninges, quantified two weeks after  
469 injection. (NSG - non-obese, diabetic, severe combined immunodeficient, *Il2rg*<sup>null</sup>).

470

471 (I) Representative immunofluorescent image of brain tissue from cancer-naïve animals  
472 overexpressing *Egfp* or *Ifng* in the leptomeninges, stained for Iba1<sup>+</sup> myeloid cells (scale bar  
473 = 50 μm). Box plot illustrates quantification of Iba1<sup>+</sup> cells in the ventricular choroid plexi.

474

475 (J) *In vivo* radiance of LLC LeptoM cells delivered intracisternally into C57Bl6-*Tyr*<sup>c-2</sup> animals  
476 overexpressing *Egfp* or *Ifng* in the leptomeninges and tri-weekly infused with non-targeting  
477 isotype control antibody or CSF1R-targeting antibody, quantified two weeks after injection.

478



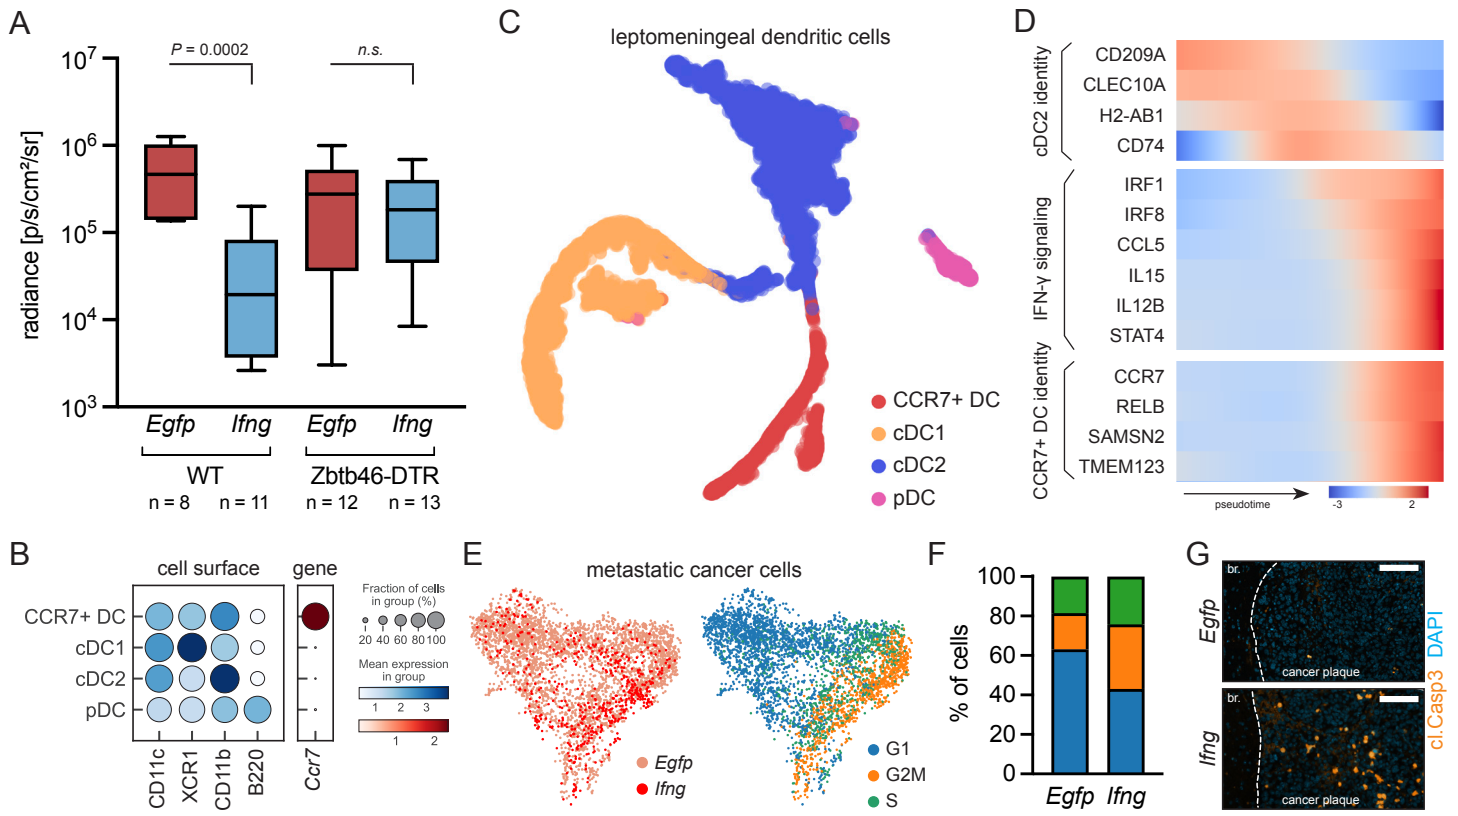

479 **Fig. 4. Leptomeningeal IFN- $\gamma$  supports cDC maturation**

480

481 (A) *In vivo* radiance of LLC LeptoM cells delivered intracisternally into C57Bl6-*Tyr<sup>c-2</sup>* bone  
482 marrow chimeras overexpressing *Egfp* or *Ifng* in the leptomeninges after administration of  
483 diphtheria toxin. Host mice were infused with bone marrow from wild-type or *Zbtb46*-DTR<sup>+/+</sup>  
484 C57Bl6 mice. Depletion efficiency is quantified in fig. S14.

485

486 (B) Dot plot showing expression of characteristic dendritic cell (DC) surface proteins and  
487 *Ccr7* gene, as determined with single-cell proteogenomics (dendritic cells pooled from 4  
488 conditions, and 6 mice *per* condition were included; see fig. S15-S17 for details).

489

490 (C) tSNE projection of mouse leptomeningeal DC types with predicted maturation  
491 streamlines from vehicle- and LLC LeptoM-injected mice two weeks after inoculation,  
492 subjected to 10x CITE-seq (total of n = 7,566 cells pooled from 4 conditions and n = 6  
493 animals *per* group). cDC and pDC cells shown in fig. S15 were subsetted and reclustered,  
494 and tSNE was built in multiscale space derived from diffusion components, see Methods.

495

496 (D) Expression trends in genes associated with cDC2 identity, IFN- $\gamma$  signaling, and CCR7+  
497 identity, along diffusion pseudotime axis representing cDC2-CCR7+ DC maturation. Gene  
498 trends were computed with Palantir<sup>27</sup>. See also fig. S16 and S17, and Methods.

499

500 (E) UMAP projection of identity (left) and cell cycle phase prediction (right) in LLC LeptoM  
501 cancer cells, isolated from animals overexpressing *Egfp* or *Ifng* in the leptomeninges (n =  
502 3,161 and n = 557 cells from *Egfp* or *Ifng*-overexpressing mice, respectively; n = 6 animals  
503 *per* group). Cancer cells were identified as keratin- and CD63-expressing cluster and  
504 visualized without additional re-clustering, see fig. S4 and S15.

505

506 (F) Quantification of LLC LeptoM gene expression-based cell cycle prediction from panel E.  
507 See also fig. S18, A to C. Predictions were computed using scores of gene lists  
508 characteristic for S and G2/M phases, see Methods.

509

510 (G) Representative immunofluorescent image of E0771 LeptoM cancer plaques in animals  
511 overexpressing *Egfp* or *Ifng* in the leptomeninges, stained for cleaved Caspase 3 (scale bar  
512 = 50  $\mu$ m). For quantification see fig. S18, D to F.

513

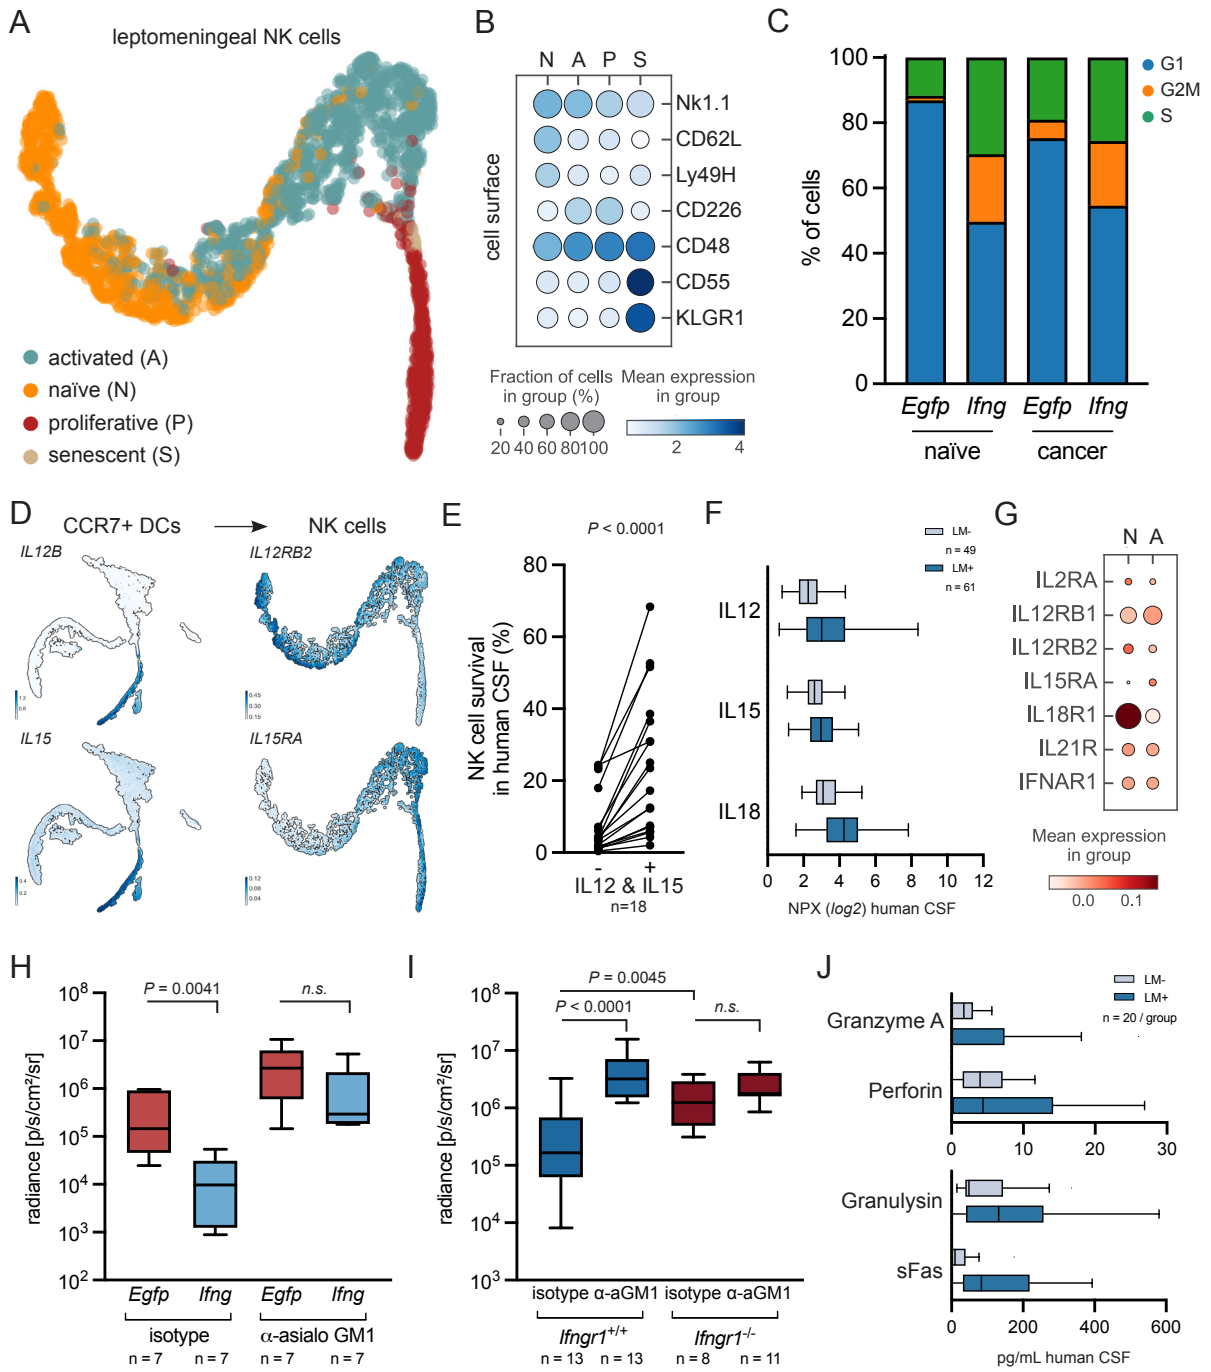

514 **Fig. 5. cDC-derived cytokines mediate NK cell activity and proliferation to prevent**  
515 **cancer cell outgrowth**

516

517 (A) tSNE projection of mouse leptomeningeal natural killer (NK) cell states from vehicle- and  
518 LLC LeptoM-injected mice two weeks after inoculation, subjected to 10x CITE-seq (total of n  
519 = 2,247 cells from 4 conditions, n = 6 animals *per* group). Nk1.1<sup>+</sup> NKG7<sup>+</sup> CD3<sup>-</sup> TCRβ<sup>-</sup> cells  
520 from fig. S15 were subsetted and reclustered, and tSNE was built in multiscale space  
521 derived from diffusion components, see Methods.

522

523 (B) Expression of cell state-enriched NK surface proteins in mouse, as determined with  
524 single-cell proteogenomics.

525

526 (C) NK cell cycle prediction in vehicle-injected, cancer-naïve or LLC LeptoM-bearing animals  
527 overexpressing *Egfp* or *Ifng* in the leptomeninges, as determined with single-cell  
528 proteogenomics. Predictions were computed using scores of gene lists characteristic for S  
529 and G2/M phases, see Methods.

530

531 (D) Smoothened gene expression of selected CCR7<sup>+</sup> DC ligands and NK cell receptors,  
532 projected onto tSNE plots. Gene imputation was performed with Markov affinity-based graph  
533 imputation of cells (MAGIC)<sup>43</sup>.

534

535 (E) Paired analysis of NK cell survival in human LM- CSF without or with addition of  
536 recombinant mouse IL12 and IL15 (results pooled from four independent replicates, paired *t*  
537 test).

538

539 (F) Relative abundance of IL12, IL15, and IL18 in the CSF of LM- and LM+ cancer patients,  
540 as determined with targeted proteomics.

541

542 (G) Expression of cell state-enriched human NK surface proteins, as determined with single-  
543 cell transcriptomics. For annotation see fig. S19, D to F.

544

545 (H) *In vivo* radiance of LLC LeptoM cells delivered intracisternally into C57Bl6-*Tyr<sup>c-2</sup>* animals  
546 overexpressing *Egfp* or *Ifng* in the leptomeninges and bi-weekly infused with non-targeting  
547 isotype control antibody or asialo-GM1-targeting antibody, quantified two weeks after  
548 injection.

549

550 (I) *In vivo* radiance of LLC LeptoM cells delivered intracisternally into C57BL/6 *Ifngr1*-  
551 proficient and -deficient animals and bi-weekly infused with non-targeting isotype control  
552 antibody or asialo-GM1-targeting antibody, quantified two weeks after injection.

553

554 (J) Quantification of soluble Granzyme A, Perforin, Granulysin, and sFas in the CSF of LM-  
555 and LM+ cancer patients, as determined by cytokine bead arrays.

556

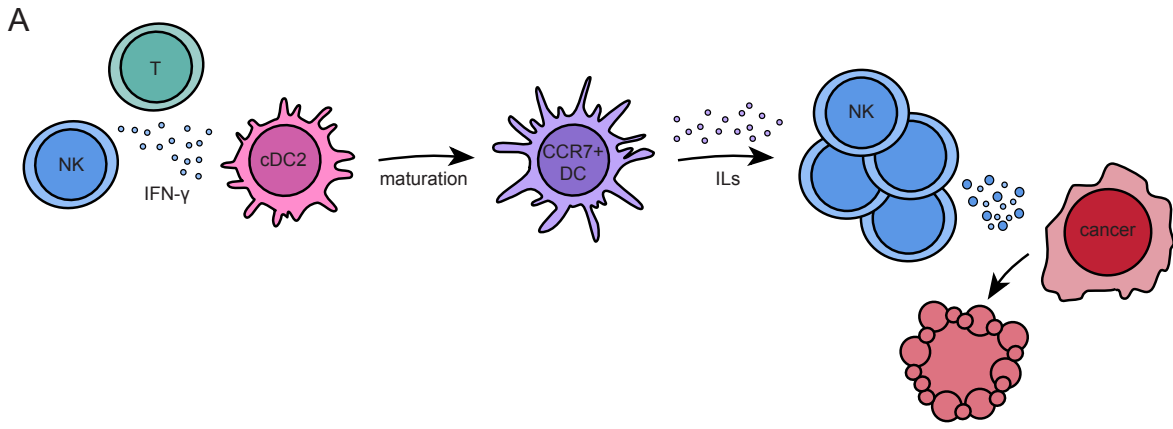

557 **Fig. 6. Leptomeningeal dendritic cells represent the essential IFN- $\gamma$  target**

558

559 (A) Schematic highlighting the main findings of this study. Leptomeningeal IFN- $\gamma$ , produced  
560 mainly by T and NK cells, supports maturation of conventional DC2 into migratory DCs.

561 These migratory DCs are characterized by the expression of *Ccr7* in mouse, and *LAMP3* in  
562 human. In an antigen-independent manner, these newly raised leptomeningeal migratory  
563 DCs produce an array of interleukins that support survival and proliferation of NK cells. NK  
564 are the cytotoxic effectors that control the expansion of metastatic cells in leptomeninges.

565 **Conflict of Interest.**

566 A.B. holds an unpaid position on the Scientific Advisory Board for Evren Scientific and is an  
567 inventor on the following patents: 62/258,044, 10/413,522, and 63/052,139. D.P. is on the  
568 scientific advisory board of Insitro. Other authors declare no conflict of interest.

569

570 **Material and data availability.**

571 RNA-seq datasets were deposited online in the NCBI Gene Expression Omnibus (GEO)  
572 under the accession numbers GSE221358 (bulk RNA-seq), GSE221593 (mouse single-cell  
573 proteogenomics), GSE221522 (human single-cell RNA-seq). Commercially available  
574 materials can be obtained from vendors. Materials generated in this study are available from  
575 the corresponding author upon signing the MSKCC Material Transfer Agreement. Human  
576 samples used in this study are limited biological resource, not available for further  
577 distribution.

578

579 **Acknowledgements.**

580 We wish to express our deep gratitude to the patients and families that inspire this work and  
581 donate clinical samples for this research. We also thank Anna Skakodub, Rachel Estrera,  
582 and Isaiah Osei-Gyening for help with management of human CSF bank, Dr. Chrysothemis  
583 Brown, Dr. Cassandra Burdziak, Dr. Lisa DeAngelis, Dr. Morgan Freret, Dr. Andrea  
584 Schietinger, Roshan Sharma, Dr. Thomas Walle, and Dr. Jedd Wolchok for fruitful  
585 discussions, to Dr. Majdi Alghader, Camille Derderian, and David Guber for technical  
586 assistance, and to Ojasvi Chaudhary and Ignas Masilionas for help with wet lab single-cell  
587 processing.

588

589 Financial support for this research was provided to A.B. by the Damon Runyon Cancer  
590 Research Foundation, the Pershing Square Sohn Cancer Research Alliance, the Alan and  
591 Sandra Gerry Metastasis and Tumor Ecosystems Center, and the NCI R01CA245499. J.R.  
592 was supported by the American Brain Tumor Association Basic Research Fellowship, the  
593 Terri Brodeur Breast Cancer Foundation, and the Fiona and Stanley Druckenmiller Center  
594 for Lung Cancer Research. All investigations were supported by NCI P30 CA008748  
595 (Cancer Center Support Grant). This publication is part of the HTAN (Human Tumor Atlas  
596 Network) Consortium paper package. A list of HTAN members is available at  
597 <https://humantumoratlas.org/htan-authors/>.

598

599 **Author contributions.**

600 J.R. and A.B. conceived and designed the study, acquired funding, and wrote the  
601 manuscript. J.R. generated metastatic cell lines, developed the methodology, performed the



602 experiments, analysed, and curated the data. X.T., M.L., D.I., and J.S. assisted with  
603 experiments and replicated critical experiments. J.R. and R.K. performed computational  
604 analysis under D.P.'s supervision. A.O. assisted with immunofluorescent staining and image  
605 analysis. K.C., J.A.W., and U.S. assisted with clinical annotations and human CSF  
606 collection. T.B. reviewed cytospin staining. R.C. supervised single-cell sequencing. All  
607 authors approved the final manuscript. A.B. supervised the study.

608 **References**

609

610 1 Boire, A. *et al.* Complement Component 3 Adapts the Cerebrospinal Fluid for  
611 Leptomeningeal Metastasis. *Cell* **168**, 1101-1113 e1113 (2017).

612 <https://doi.org/10.1016/j.cell.2017.02.025>

613 2 Smalley, I. *et al.* Proteomic Analysis of CSF from Patients with Leptomeningeal  
614 Melanoma Metastases Identifies Signatures Associated with Disease Progression  
615 and Therapeutic Resistance. *Clin Cancer Res* **26**, 2163-2175 (2020).

616 <https://doi.org/10.1158/1078-0432.CCR-19-2840>

617 3 Yoo, B. C. *et al.* Cerebrospinal fluid metabolomic profiles can discriminate patients  
618 with leptomeningeal carcinomatosis from patients at high risk for leptomeningeal  
619 metastasis. *Oncotarget* **8**, 101203-101214 (2017).

620 <https://doi.org/10.18632/oncotarget.20983>

621 4 Chi, Y. *et al.* Cancer cells deploy lipocalin-2 to collect limiting iron in leptomeningeal  
622 metastasis. *Science* **369**, 276-282 (2020). <https://doi.org/10.1126/science.aaz2193>

623 5 Smalley, I. *et al.* Single-Cell Characterization of the Immune Microenvironment of  
624 Melanoma Brain and Leptomeningeal Metastases. *Clin Cancer Res* **27**, 4109-4125  
625 (2021). <https://doi.org/10.1158/1078-0432.CCR-21-1694>

626 6 Prakadan, S. M. *et al.* Genomic and transcriptomic correlates of immunotherapy  
627 response within the tumor microenvironment of leptomeningeal metastases. *Nat*  
628 *Commun* **12**, 5955 (2021). <https://doi.org/10.1038/s41467-021-25860-5>

629 7 Remsik, J. *et al.* Inflammatory Leptomeningeal Cytokines Mediate COVID-19  
630 Neurologic Symptoms in Cancer Patients. *Cancer Cell* **39**, 276-283 e273 (2021).

631 <https://doi.org/10.1016/j.ccell.2021.01.007>

632 8 Law, V. *et al.* A preclinical model of patient-derived cerebrospinal fluid circulating  
633 tumor cells for experimental therapeutics in leptomeningeal disease from melanoma.  
634 *Neuro Oncol* (2022). <https://doi.org/10.1093/neuonc/noac054>

635 9 Wang, N., Bertalan, M. S. & Brastianos, P. K. Leptomeningeal metastasis from  
636 systemic cancer: Review and update on management. *Cancer* **124**, 21-35 (2018).

637 <https://doi.org/10.1002/cncr.30911>

638 10 Stoeckius, M. *et al.* Simultaneous epitope and transcriptome measurement in single  
639 cells. *Nat Methods* **14**, 865-868 (2017). <https://doi.org/10.1038/nmeth.4380>

640 11 Eshleman, E. M., Bortell, N., McDermott, D. S., Crisler, W. J. & Lenz, L. L. Myeloid  
641 cell responsiveness to interferon-gamma is sufficient for initial resistance to *Listeria*  
642 monocytogenes. *Curr Res Immunol* **1**, 1-9 (2020).

643 <https://doi.org/10.1016/j.crimmu.2020.01.001>

- 644 12 Ivashkiv, L. B. IFN $\gamma$ : signalling, epigenetics and roles in immunity, metabolism,  
645 disease and cancer immunotherapy. *Nat Rev Immunol* **18**, 545-558 (2018).  
646 <https://doi.org/10.1038/s41577-018-0029-z>
- 647 13 Dalton, D. K. *et al.* Multiple defects of immune cell function in mice with disrupted  
648 interferon-gamma genes. *Science* **259**, 1739-1742 (1993).  
649 <https://doi.org/10.1126/science.8456300>
- 650 14 Huang, S. *et al.* Immune response in mice that lack the interferon-gamma receptor.  
651 *Science* **259**, 1742-1745 (1993). <https://doi.org/10.1126/science.8456301>
- 652 15 Moris, G. & Garcia-Monco, J. C. The challenge of drug-induced aseptic meningitis  
653 revisited. *JAMA Intern Med* **174**, 1511-1512 (2014).  
654 <https://doi.org/10.1001/jamainternmed.2014.2918>
- 655 16 Cui, J. *et al.* Inflammation of the Embryonic Choroid Plexus Barrier following  
656 Maternal Immune Activation. *Dev Cell* **55**, 617-628 e616 (2020).  
657 <https://doi.org/10.1016/j.devcel.2020.09.020>
- 658 17 Herrlinger, U., Weller, M. & Schabet, M. New aspects of immunotherapy of  
659 leptomeningeal metastasis. *J Neurooncol* **38**, 233-239 (1998).  
660 <https://doi.org/10.1023/a:1005948722912>
- 661 18 Kaya, T. *et al.* CD8(+) T cells induce interferon-responsive oligodendrocytes and  
662 microglia in white matter aging. *Nat Neurosci* **25**, 1446-1457 (2022).  
663 <https://doi.org/10.1038/s41593-022-01183-6>
- 664 19 Wang, Y. *et al.* STAT1/IRF-1 signaling pathway mediates the injurious effect of  
665 interferon-gamma on oligodendrocyte progenitor cells. *Glia* **58**, 195-208 (2010).  
666 <https://doi.org/10.1002/glia.20912>
- 667 20 Baruch, K. *et al.* CNS-specific immunity at the choroid plexus shifts toward  
668 destructive Th2 inflammation in brain aging. *Proc Natl Acad Sci U S A* **110**, 2264-  
669 2269 (2013). <https://doi.org/10.1073/pnas.1211270110>
- 670 21 Shechter, R. *et al.* Recruitment of beneficial M2 macrophages to injured spinal cord  
671 is orchestrated by remote brain choroid plexus. *Immunity* **38**, 555-569 (2013).  
672 <https://doi.org/10.1016/j.immuni.2013.02.012>
- 673 22 Meredith, M. M. *et al.* Expression of the zinc finger transcription factor zDC (Zbtb46,  
674 Btbd4) defines the classical dendritic cell lineage. *J Exp Med* **209**, 1153-1165 (2012).  
675 <https://doi.org/10.1084/jem.20112675>
- 676 23 Maier, B. *et al.* A conserved dendritic-cell regulatory program limits antitumour  
677 immunity. *Nature* **580**, 257-262 (2020). <https://doi.org/10.1038/s41586-020-2134-y>
- 678 24 Brown, C. C. *et al.* Transcriptional Basis of Mouse and Human Dendritic Cell  
679 Heterogeneity. *Cell* **179**, 846-863 e824 (2019).  
680 <https://doi.org/10.1016/j.cell.2019.09.035>

- 681 25 Cheng, S. *et al.* A pan-cancer single-cell transcriptional atlas of tumor infiltrating  
682 myeloid cells. *Cell* **184**, 792-809 e723 (2021).  
683 <https://doi.org/10.1016/j.cell.2021.01.010>
- 684 26 Lange, M. *et al.* CellRank for directed single-cell fate mapping. *Nat Methods* **19**, 159-  
685 170 (2022). <https://doi.org/10.1038/s41592-021-01346-6>
- 686 27 Setty, M. *et al.* Characterization of cell fate probabilities in single-cell data with  
687 Palantir. *Nat Biotechnol* **37**, 451-460 (2019). <https://doi.org/10.1038/s41587-019-0068-4>
- 688
- 689 28 Nirschl, C. J. *et al.* IFN $\gamma$ -Dependent Tissue-Immune Homeostasis Is Co-opted  
690 in the Tumor Microenvironment. *Cell* **170**, 127-141 e115 (2017).  
691 <https://doi.org/10.1016/j.cell.2017.06.016>
- 692 29 Wu, S. Y., Fu, T., Jiang, Y. Z. & Shao, Z. M. Natural killer cells in cancer biology and  
693 therapy. *Mol Cancer* **19**, 120 (2020). <https://doi.org/10.1186/s12943-020-01238-x>
- 694 30 Spector, R., Robert Snodgrass, S. & Johanson, C. E. A balanced view of the  
695 cerebrospinal fluid composition and functions: Focus on adult humans. *Exp Neurol*  
696 **273**, 57-68 (2015). <https://doi.org/10.1016/j.expneurol.2015.07.027>
- 697 31 Oppenheim, H. Ueber Hirnsymptome bei Carinomatose ohne nachweisbare  
698 Veränderungen im Gehirn. *Charité Annalen* **Vol XIII**, p335 (1888).
- 699 32 Schwarz, E., Bertels, A. Über „Meningitis“ carcinomatosa. *Deutsche Zeitschrift für*  
700 *Nervenheilkunde* **42**, p85-94 (1911).
- 701 33 Gocher, A. M., Workman, C. J. & Vignali, D. A. A. Interferon-gamma: teammate or  
702 opponent in the tumour microenvironment? *Nat Rev Immunol* **22**, 158-172 (2022).  
703 <https://doi.org/10.1038/s41577-021-00566-3>
- 704 34 Fernandez-Castaneda, A. *et al.* Mild respiratory SARS-CoV-2 infection can cause  
705 multi-lineage cellular dysregulation and myelin loss in the brain. *bioRxiv* (2022).  
706 <https://doi.org/10.1101/2022.01.07.475453>
- 707 35 Kaplan, D. H. *et al.* Demonstration of an interferon gamma-dependent tumor  
708 surveillance system in immunocompetent mice. *Proc Natl Acad Sci U S A* **95**, 7556-  
709 7561 (1998). <https://doi.org/10.1073/pnas.95.13.7556>
- 710 36 Dutta, T., Spence, A. & Lampson, L. A. Robust ability of IFN-gamma to upregulate  
711 class II MHC antigen expression in tumor bearing rat brains. *J Neurooncol* **64**, 31-44  
712 (2003). <https://doi.org/10.1007/BF02700018>
- 713 37 Proper, D. J. *et al.* Low-dose IFN-gamma induces tumor MHC expression in  
714 metastatic malignant melanoma. *Clin Cancer Res* **9**, 84-92 (2003).
- 715 38 Naidoo, J. *et al.* Pembrolizumab for patients with leptomeningeal metastasis from  
716 solid tumors: efficacy, safety, and cerebrospinal fluid biomarkers. *J Immunother*  
717 *Cancer* **9** (2021). <https://doi.org/10.1136/jitc-2021-002473>

- 718 39 Brastianos, P. K. *et al.* Single-arm, open-label phase 2 trial of pembrolizumab in  
719 patients with leptomeningeal carcinomatosis. *Nat Med* **26**, 1280-1284 (2020).  
720 [https://doi.org:10.1038/s41591-020-0918-0](https://doi.org/10.1038/s41591-020-0918-0)
- 721 40 Brastianos, P. K. *et al.* Phase II study of ipilimumab and nivolumab in leptomeningeal  
722 carcinomatosis. *Nat Commun* **12**, 5954 (2021). [https://doi.org:10.1038/s41467-021-](https://doi.org/10.1038/s41467-021-25859-y)  
723 [25859-y](https://doi.org/10.1038/s41467-021-25859-y)
- 724 41 Myers, J. A. & Miller, J. S. Exploring the NK cell platform for cancer immunotherapy.  
725 *Nat Rev Clin Oncol* **18**, 85-100 (2021). [https://doi.org:10.1038/s41571-020-0426-7](https://doi.org/10.1038/s41571-020-0426-7)
- 726 42 Murphy, T. L. & Murphy, K. M. Dendritic cells in cancer immunology. *Cell Mol*  
727 *Immunol* **19**, 3-13 (2022). [https://doi.org:10.1038/s41423-021-00741-5](https://doi.org/10.1038/s41423-021-00741-5)
- 728 43 van Dijk, D. *et al.* Recovering Gene Interactions from Single-Cell Data Using Data  
729 Diffusion. *Cell* **174**, 716-729 e727 (2018). [https://doi.org:10.1016/j.cell.2018.05.061](https://doi.org/10.1016/j.cell.2018.05.061)
- 730

## 1 **Supplementary Materials and Methods**

2

### 3 **Human CSF.**

4 Cancer patients undergoing routine clinical procedures including spinal tap, Ommaya  
5 reservoir tap, or a ventricular shunt provided informed consent. CSF collected in excess of  
6 that needed for clinical care was reserved for this use under MSKCC Institutional Review  
7 Board-approved protocols 20-117, 18-505, 13-039, 12-245, and 06-107. Human CSF was  
8 processed as described in <sup>1</sup>, de-identified, and aliquoted. Cell-free CSF and CSF cell pellets  
9 were biobanked and stored at -80°C until further analysis. Patient medical records and MRI  
10 scans were reviewed to confirm the LM status by neurooncologists (U.S., J.A.W., and A.B.),  
11 and clinical data necessary for this study was abstracted and de-identified. Giemsa-stained  
12 cytospins were part of routine diagnostic assessment and were retrieved and reviewed by  
13 neuropathologist (T.B.).

14

### 15 **Human single-cell transcriptomics.**

#### 16 *Sample processing.*

17 Freshly collected CSF obtained by lumbar puncture was placed on ice and processed within  
18 two hours, as described previously <sup>1</sup>, PBS-washed cells were encapsulated with Chromium  
19 Single Cell 3' Library and Gel Bead Kit V2 (10x Genomics) and sequenced on an NovaSeq  
20 6000 system (Illumina). Raw and pre-processed data were deposited to NCBI GEO under  
21 accession number GSE221522.

22

#### 23 *Data preprocessing, initial processing, and batch correction.*

24 Raw FASTQC files were pre-processed with SEQC <sup>2,3</sup> with human reference genome hg38,  
25 and dense SEQC matrices were imported into Python. Each sample was plotted as a  
26 histogram of total counts *per* cell barcode on the *log* scale, resulting in a distribution with  
27 multiple modes and the threshold to remove the smallest mode, containing empty droplets  
28 and low-quality cells, was defined manually. We next removed any genes that had counts  
29 equal to 0 after filtering. To remove doublets, we run the DoubletDetection method  
30 (parameters  $n\_iter = 50$ ,  $p\_thres = 1e-7$ ,  $voter\_thres = 0.8$ ) <sup>4</sup>. We outer joined the individual  
31 samples to keep all detected genes, filtered cells to a minimum count of UMI = 100 and  
32 minimum total expressed genes of 100. We initially detected 22,051 cells and , genes and  
33 retained 20,676 high-quality cells and 18,322 genes after filtering. We detected  $\sim 1,497 \pm 898$   
34 genes per cell,  $\sim 6,268 \pm 6,553$  gene counts per cells, out of which  $3.25 \pm 2.99\%$  were  
35 mitochondrial genes (values represent mean  $\pm$  one standard deviation). We normalized the  
36 library size, keeping raw count matrix for downstream analyses and removed any genes

37 expressed in fewer than 5 cells. For downstream analysis, we further removed mitochondrial  
38 genes (prefix MT-), ribosomal genes (prefix RPS- or RPL-), and hemoglobin genes (prefix  
39 HB-). We run Scanorama (default settings; kNN = 20)<sup>5</sup> on the resulting AnnData object to  
40 batch correct across patients. Batch correction was validated as follows: (i) cancer cells have  
41 higher inter-patient heterogeneity (fig. S1), suggesting absence of overcorrection, and (ii) we  
42 identified and filtered out only few quasi-cancer cells from LM- patients after computational  
43 mixing (their presence was ruled out by pathologist during diagnostic cytology reading). This  
44 corrected matrix was employed for visualization, but not for individual gene comparisons. We  
45 then run PCA (sc.pp.pca, n\_components = 100). We constructed a k-nearest neighbor graph  
46 (kNN) based on 30 nearest neighbors and 100 principal components, using the scanorama  
47 100-dimensional matrix (instead of PCA matrix). We clustered the cells with Leiden  
48 (resolution 2.0)<sup>6</sup> and these Leiden clusters were merged according to major cell types,  
49 which were assigned based on marker gene expression, as showed in fig. S1. UMAP was  
50 computed with sc.tl.umap, using default parameters. The inter-patient heterogeneity was  
51 measured with Shannon entropy,  $H_j$  (fig. S1, G to I)<sup>7</sup>:

$$52 \quad H_j = \sum_T -q_T \log q_T$$

53 For each cell, the Shannon entropy measures the sample diversity of its nearest neighbors  
54 in the kNN graph. Each sample was subsampled to contain 500 cells. If samples are well-  
55 mixed, entropy of each cell will be high, while if samples are not well mixed entropies will  
56 tend to be low (this is true for cancer cells in general, which show extreme heterogeneity  
57 across patients). See fig. S1 for quality control plots. Human LM+ single-cell transcriptomic  
58 data was retrieved from NCBI GEO GSE150660<sup>1</sup>. Raw and pre-processed data are  
59 available through NCBI GEO under accession number GSE221522. All ten human samples  
60 were collected between December 2017 and May 2018 and processed with the same  
61 pipeline.

62

### 63 *Subsetting of cells for downstream analyses and visualization.*

64 Subsetting was performed by selecting cell clusters from major Leiden populations, shown in  
65 Fig. 1B. For analysis of dendritic cells (DC), 'cDC' and 'pDC' clusters were subsetting and  
66 reclustered with sc.tl.umap and Leiden (resolution = 0.5). Cell type annotation was  
67 performed as follows: cDC1 cells are  $CLEC9A^+XCR1^+$ , cDC2 cells are  $CLEC10A^+CD1C^+$ ,  
68 pDC cells are  $IRF7^+TCF4^+$ . Human LAMP3+ migratory dendritic cells are  $LAMP3^+CCR7^+$   
69 (orthologous to mouse CCR7+ DC). Two clusters bearing cDC2 signature were merged for  
70 further analyses. For analysis of natural killers (NK), 'NK' cluster was subsetting and  
71 reclustered with Leiden (resolution = 0.8), yielding in populations of cells with high *SELL*  
72 (CD62L) expression, further denoted as naïve-like, and populations with low *SELL*



73 expression, denoted as activated-like and characterized by the expression of *CXCR6*. For  
74 analysis of both cell types, we run Palantir with default settings ( $n\_components = 5$ ,  $knn =$   
75  $30$ ) that allowed us to access MAGIC-imputed (Markov affinity-based graph imputation of  
76 cells) cell counts, and these imputed cell counts were used only for visualization with 2D  
77 plots<sup>8,9</sup>. UMAP, tSNE and heatmap plotting was performed using Scanpy<sup>10</sup> and scVelo<sup>11</sup>  
78 toolkits. Embedding density was computed with `sc.tl.embedding_density` (Fig. 1C). For NK  
79 cell gene expression heatmap, counts were first zero-centered with `sc.pp.scale` (fig. S19G).  
80 Code for pre-processing and downstream analysis is available from corresponding author  
81 and will be deposited to GitHub after peer review.

82

### 83 **Human CSF targeted proteomics.**

84 Samples were processed and analysed essentially as described in<sup>12</sup>. Biobanked CSF  
85 collected between 2015-2020 was aliquoted and stored at  $-80^{\circ}\text{C}$  at MSK Brain Tumor Center  
86 CSF Bank. Samples were slowly thawed on ice and  $45\ \mu\text{L}$  of CSF was mixed with  $5\ \mu\text{L}$  of  
87 10% Triton X-100 (Sigma, T8787) in saline and incubated at room temperature for two hours  
88 (final concentration of Triton X-100 was 1%). Samples were then dispensed in a randomized  
89 fashion into 96-well PCR plates and stored at  $-80^{\circ}\text{C}$  until further analysis. Relative levels of  
90 proteins in two targeted panels were detected using proximity extension assay (Olink Target  
91 96 Inflammation and Olink Target 96 Neuro Exploratory, Olink). Additional control, LM-  
92 samples were retrieved from<sup>12</sup> (CoV- cohort). Protein abundance values are shown in NPX  
93 units ( $\log_2$  scale). The analytical range for each analyte is available online ([www.olink.com](http://www.olink.com)).  
94

95

### 95 **Mouse strains and housing.**

96 All animal studies were approved by the MSKCC Institutional Animal Care and Use  
97 Committee under the protocol 18-01-002. Wild-type C57Bl/6 (JAX#000664) were purchased  
98 from Jackson Laboratory or bred in-house. C57Bl/6-*Tyr<sup>c-2</sup>* (JAX#000058, albino C57Bl/6) and  
99 BALB/c (JAX#000651) animals were purchased from the Jackson Laboratory. NSG animals  
100 were obtained from MSKCC RARC Colony Management Group. Purchased mice were  
101 allowed to habituate for at least one week before manipulation and experimentation.  
102 Transgenic lines on C57Bl/6 background were purchased from the Jackson Laboratory and  
103 bred in-house: *Ifng* knock-out line (B6.129S7-*Ifng<sup>tm1Ts</sup>*/J, JAX#002287), *Ifngr1* knock-out line  
104 (B6.129S7-*Ifngr1<sup>tm1Agt</sup>*/J, JAX#003288), *Rag1* knock-out line (B6.129S7-*Rag1<sup>tm1Mom</sup>*/J,  
105 JAX#002216), double-reported knock-in/knock-out *Cx3cr1<sup>GFP/GFP</sup> Ccr2<sup>RFP/RFP</sup>* (B6.129(Cg)-  
106 *Cx3cr1<sup>tm1Litt</sup> Ccr2<sup>tm2.1fc</sup>*/JernJ, JAX#032127). For homozygous breeding, breeding pairs and  
107 randomly selected progenies used in the experiments were genotyped as recommended.  
108 For experiments that involved bioluminescent imaging where wild-type animals were not  
109 compared to transgenic lines, albino C57Bl/6-*Tyr<sup>c-2J</sup>* animals were used. Mice in all



110 experimental groups were age- ( $\pm$  4 days), sex-, and fur color-matched. Mice used in this  
111 study were housed in a specific pathogen-free conditions, in an environment with controlled  
112 temperature and humidity, on 12-hour light/dark cycles (lights on/off at 6:00 am/pm), and  
113 with access to regular chow and sterilized tap water *ad libitum*.

114

#### 115 **Cell culture.**

116 Mouse lung cancer LLC sublines were described previously<sup>13</sup>. Mouse breast cancer E0771  
117 cells were kind gift from Dr. Ekrem Emrah Er. B16-F10 (CRL-6475), Yumm5.2 (CRL-3367),  
118 EMT6 (CRL-2755), and 4T1 cells (CRL-2539) were obtained from ATCC. LentiX 293T cells  
119 (#632180) were obtained from Takara. Plasmotest HEK Blue-2 cells (rep-pt1) were  
120 obtained from Invivogen. LLC, E0771, and B16 sublines and LentiX 293T and HEK Blue-2  
121 cells were maintained in high-glucose DME (MSKCC Media Core), supplemented with 10%  
122 fetal bovine serum (FBS; Omega Scientific #FB-01) and 1% penicillin-streptomycin (P/S;  
123 Gibco #15140163) or 1x Primocin (Invivogen #ant-pm-2). Yumm5.2 sublines were  
124 maintained in high-glucose DME:F12 (MSKCC Media Core), supplemented with 10% FBS,  
125 1% non-essential amino acids (Gibco #11140050) and 1% P/S or 1x Primocin. 4T1 sublines  
126 were maintained in RPMI (MSKCC Media Core), supplemented with 10% FBS and 1% P/S  
127 or 1x Primocin. EMT6 sublines maintained in Waymouth's (MSKCC Media Core),  
128 supplemented with 10% FBS and 1% P/S or 1x Primocin. Cell lines were subcultured at  
129 least twice a week, replaced approximately after six weeks in culture with new stocks, stored  
130 in liquid nitrogen, and routinely tested negative for mycoplasma contamination. Proliferation  
131 of vehicle- or recombinant mouse IFN- $\gamma$ -exposed (Biolegend #714006) cancer cells *in vitro*  
132 was measured with CellTiter-Glo luminescent cell viability assay (Promega G7572) 72 hours  
133 after seeding 500 cells *per well* into 96-well, white-walled plate (Corning).

134

#### 135 **Genetic engineering of mouse cancer cell lines.**

136 Plasmid DNA was amplified in NEB Stable Competent *E. coli* (New England Biolabs  
137 #c3040i) or other *E. coli* strains provided by vendors, grown in LB broth (MSKCC Media  
138 Core) overnight and isolated with ZymoPURE II kit (Zymo Research #D4203). Mouse cancer  
139 cell lines generated in this study were engineered to constitutively express V5-tagged Firefly  
140 luciferase (pLenti-PGK-V5-Luc-Puro<sup>w543-1</sup>, Addgene #19360), kind gift from Dr. Eric  
141 Campeau and Dr. Paul Kaufman. Some LeptoM derivatives (LLC LeptoM, E0771 LeptoM,  
142 B16 LeptoM) used in the flow cytometry experiments were additionally engineered to  
143 constitutively express AmCyan fluorescent protein (pLV-EF1a-AmCyan1-IRES-Puro, Takara  
144 #0039VCT). Lentiviral constructs for CRISPR-Cas9 editing in the pLV-hCas9:T2A:Bsd  
145 backbone were synthesized by VectorBuilder. sgRNA sequences expressed under the  
146 control of U6 promoter were as follows: sg*LacZ* - 'TGCGAATACGCCACGCGAT', sg

147 *Ifngr2#1* 'TGGACCTCCGAAAAACATCT', *sgIfngr2#2* 'AGGGAACCTCACTTCCAAGT', *sg*  
148 *Ifngr2#3* 'TCTGTGATGTCCGTACAGTT'. Lentiviral particles were prepared with LentiX  
149 293T cell line using ecotropic, VSV-G pseudotyped lentiviral system and concentrator  
150 (Takara #631276 and #631232), as recommended. Mouse cancer cell lines were spin-  
151 transduced (1000 g, 32°C, 1 hour) with concentrated lentiviral particles in complete culture  
152 medium containing 5 µg/mL hexadimethrine bromide (Santa Cruz, #sc-134220) and selected  
153 for 5-7 days in complete medium containing 2-5 µg/mL puromycin (Gibco, #A1113802) or 5-  
154 10 µg/mL blasticidin (Invivogen, ant-bl-1). CRISPR-Cas9 edited lines and control clones  
155 were single-cell sorted into 96-well plate. Gene function was assessed functionally (LLC,  
156 E0771, and B16 LeptoM; see fig. S8), and DNA editing was confirmed with Sanger  
157 sequencing (LLC and E0771 LeptoM; not shown) after expansion.

158

### 159 **Cancer cell injections.**

160 Cancer cells were injected into mice between 6 and 16 weeks of age. Mice were deeply  
161 anesthetized in an insulated chamber perfused with 2-3% isoflurane (Covetrus;  
162 #11695067772) in medical air or with intraperitoneally delivered mixture of ketamine (100  
163 mg/kg) and xylazine (10 mg/kg) in ultra-pure, sterile, and pyrogen-free water for injection.  
164 Female mice were used for breast cancer models and both males and females in  
165 approximately 1:1 ratio for melanoma and lung cancer models, if not stated otherwise. Mice  
166 deceased within 72 hours of injection were excluded from further analysis. Mouse hair was  
167 removed from the injection site, and the area was sterilized three times with ethanol. For  
168 intracisternal injection, 10 µL of cancer cell suspension in PBS was introduced into the  
169 cisterna magna using Hamilton syringe (Hamilton #HT80501) fitted with a 30G needle, as  
170 described previously with minor modifications<sup>13</sup>. Briefly, mouse was positioned prone over a  
171 15 mL conical tube to place cervical spine in flexion. The occiput was palpated, the needle  
172 was advanced 4 mm deep, and the syringe content was slowly released into the cisterna  
173 magna. The syringe was then held in this position for another ten seconds and then carefully  
174 ejected to prevent the reflux of injected liquid. This procedure was tolerated well by the  
175 animals (success and survival rate > 95%). Mice displaying neurologic symptoms upon  
176 awakening were immediately euthanized. The number of cancer cells introduced  
177 intracisternally was: 2,000 cells for LLC LeptoM, 4,000 cells for E0771 LeptoM, and 500 cells  
178 for B16 LeptoM, Yumm5.2 LeptoM, EMT6 LeptoM, and 4T1 LeptoM cells. For intracardiac  
179 injections, 10,000 cells (for 4T1 or EMT6 sublines) or 50,000 cells (all other sublines) was  
180 injected in 50 µL saline using 28G insulin syringe into the left cardiac ventricle. For  
181 extracranial injections, cells were injected in 50 µL percutaneously into the fourth mammary

182 fat pad (E0771 LeptoM; 500,000 cells), subcutaneously (LLC LeptoM; 200,000 cells), or  
183 intradermally (B16 LeptoM; 100,000 cells) using 28G insulin syringe.

184

#### 185 **Quantification of tumor burden.**

186 The spread and growth of cancer cell lines engineered to express V5-tagged Firefly  
187 luciferase (lucV5) was monitored using non-invasive bioluminescent imaging (BLI). Mice  
188 were anesthetized in an insulated chamber perfused with 2-3% isoflurane in medical air and  
189 injected retro-orbitally with 50  $\mu$ L of sterile D-luciferin (15 mg/mL, Goldbio #LUCK-5G)  
190 solution in PBS. BLI was captured using IVIS Spectrum-CT (Perkin Elmer). Data were  
191 recorded and processed with Living Image (v4.7.2) software. Recorded images were  
192 quantified as cranial radiance. For the rare occasion when mice on C57Bl/6 background  
193 (without tyrosinase mutation) developed melanin spots preventing luciferase imaging, these  
194 animals were not included in the imaging analysis. Tumors in the mammary fat pad,  
195 intradermal and subcutaneous tumors were measured with calibrated digital calipers (VWR  
196 #62379-531). Tumor volumes are expressed as the product of the two largest diameters, as  
197 in <sup>14</sup>.

198

#### 199 **Quantification of leptomeningeal tumor burden with image analysis.**

200 B16 melanoma sublines growing in 3D structures produce high amounts melanin that  
201 quenches light in a wide spectrum of wavelengths, interfering with accurate bioluminescent  
202 and fluorescent imaging. For these tumors, bioluminescence was therefore used solely to  
203 confirm the presence or identify the anatomic location of cancer. To overcome this limitation  
204 and to accurately quantify the tumor burden in B16 LeptoM model, brains from  
205 intracisternally injected mice were dissected, preserving the plaques of cancer, and fixed in  
206 formalin overnight. Brains were then carefully washed with tap water and placed into 6-well  
207 dishes in 70% ethanol. Brightfield images of fixed brains (basilar plane) were taken using  
208 Lumar Stereoscope (Zeiss) against dark background. Data were processed with Fiji/ImageJ  
209 (v2.0.0, NIH) as follows: images were converted to 8-bit, each brain was manually encircled,  
210 and its area was recorded. The threshold for plaque measurement was first estimated in a  
211 small cohort to capture only the plaque areas, and then applied to all subsequent  
212 measurements. Percentage of the area of cancer plaques covering the basilar surface of the  
213 brain was calculated as the area of plaques divided by the area of brain and multiplied by  
214 100. Since the 8-bit images were monochromatic, this method showed to be robust and  
215 reproducible throughout different measurements. Five control brains from mice without  
216 cancer, collected for different purposes, were measured and the area of darker structures  
217 above the pre-set threshold was less than 1% using this method.

218

219 **Derivation of leptomenigeal and parenchymal metastatic cell lines.**

220 *BrM cell lines (brain parenchyma-tropic)*

221 50,000 parental cells were injected intracardially. Hematogenous dissemination was  
222 confirmed with BLI approximately 1 hour after injection. Upon confirmation of brain  
223 colonization with BLI and development of late-stage cancer symptoms, mice were re-injected  
224 with luciferin and euthanized. Brains were dissected and imaged *ex vivo* to confirm  
225 colonization of parenchyma. Brains with overt lesions were minced, mechanically  
226 dissociated using GentleMACS (Miltenyi Biotec) and digested in a mixture of collagenase  
227 (100 U/mL, Worthington #LS005273) and DNase I (10 U/mL, Worthington #LS006333) in  
228 HG DME for 1 hour at 37°C, mechanically dissociated every 20 minutes. Suspension was  
229 then washed, filtered through a 70-micron mesh, and seeded into corresponding complete  
230 culture media, in which P/S was replaced with Primocin. The medium was changed every  
231 day for three days, then every other day. Growing cancer cell colonies were expanded for  
232 three passages and named BrM1. These cells were then again injected intracardially and the  
233 whole procedure was repeated, leading to the establishment of BrM2 cell lines, competent to  
234 colonize brain parenchyma after hematogenous dissemination.

235

236 *LeptoM cell lines (leptomeninges-tropic)*

237 2,000 lucV5-expressing parental cancer cells in 10  $\mu$ L saline were injected intracisternally.  
238 Presence in the CSF was confirmed with BLI approximately one hour after injection. Mice  
239 were monitored weekly using BLI and daily checked for the presence of pathophysiological  
240 symptoms. When these mice developed neurologic symptoms (moribund behavior, head tilt,  
241 seizures, overall weakness) and cancer presence in the CSF was indicated by BLI, luciferin  
242 was injected retro-orbitally, and mice were euthanized. Brain was dissected as described in  
243 and basilar side of brains as well as basilar meninges of mouse were assessed with BLI *post*  
244 *mortem*. The cranial cavity and brain surface were then washed with approximately 3 mL of  
245 saline. This volume was collected, pelleted, resuspended in complete media containing  
246 Primocin and maintained as described above for BrM cells. This procedure was repeated  
247 once for melanomas or three times for epithelial cancers, leading to the establishment of  
248 Inter cell lines. These Inter cells were then injected intracardially and mice were monitored  
249 with BLI and treated as described above. Successfully expanded cancer cells that were  
250 isolated from these intracardially injected mice were capable to grow colonize leptomeninges  
251 and growth in the CSF, hence named LeptoM cells. Three to five biological independent  
252 sublimes were successfully established *per* cell lines. For transcriptomic analyses, these  
253 replicates were processed separately retaining the ID of founder mice. For further *in vitro*  
254 and *in vivo* manipulations, these replicates were pooled (in one-to-one *etc.* ratios) and

255 maintained under sub-confluent conditions *in vitro* for limited number of passages (less than  
256 12).

257

### 258 **RNA collection and extraction, and transcriptomic analysis.**

259 Cancer cell lines were collected 24 hours after initial seeding of approximately  $1 \times 10^6$  cells  
260 per 100 mm plate by direct lysis with RLT buffer (Qiagen, component of RNeasy kits). RNA  
261 from cell lines was isolated with RNeasy Plus Mini Kit (Qiagen #74136), and sequenced and  
262 analyzed as described in <sup>15</sup>. Resulting HTSeq <sup>16</sup> matrices from bulk transcriptome were  
263 processed in R Studio with DESeq2 <sup>17</sup>. Data from LLC cell lines was retrieved from NCBI  
264 GEO GSE83132. Newly generated raw and pre-processed data are available through NCBI  
265 GEO under accession number GSE221358.

266

### 267 **Collection of mouse CSF and leptomeningeal immune cells.**

268 Mice were deeply anesthetized using ketamine/xylazine and transcardially perfused with  
269 sterile, ice-cold PBS. Mice were positioned as described in 'Cancer cell injections' section,  
270 and CSF was collected through the cisternal puncture into the PBS-flushed syringe fitted  
271 with a 30G needle. Approximately 15  $\mu$ L of CSF was collected from each single mouse using  
272 this procedure. Blood-contaminated samples were discarded. CSF was flash-frozen on dry  
273 ice and stored at  $-80^\circ\text{C}$  until analysis; or diluted in 200  $\mu$ L of 4% methanol-free  
274 paraformaldehyde (Electron Microscopy Sciences #15714-S) and spun onto microscopic  
275 slides to produce cytopspins. These were then left to air-dry and stained with hematoxylin QS  
276 (Vector Biolabs #H-3404-100). Leptomeningeal immune cells were collected as described  
277 previously <sup>1</sup> and processed further for downstream applications, as described in  
278 corresponding sections.

279

### 280 **Intracisternal delivery of recombinant proteins and AAV particles.**

281 Vehicle (PBS), or a 10 ng or 25 ng dose of recombinant mouse IFN- $\gamma$  (Biolegend #714006)  
282 in total volume of 10  $\mu$ L was initially delivered with cancer cell injection, followed by weekly  
283 administration, as described above. Heat inactivated IFN- $\gamma$  was prepared by incubating  
284 vehicle or vehicle-diluted IFN- $\gamma$  at  $95^\circ\text{C}$  for 15 min and allowed to cool on ice before  
285 administration. Mouse *Ifng* [NM\_008337.4] or *Egfp* sequences were inserted into AAV  
286 expression vector (pscAAV backbone under the control of CMV promoter) and used for  
287 packaging into AAV5 particles that were ultra-purified for *in vivo* applications (VectorBuilder).  
288 Genomic content (GC) was estimated with PCR. 5  $\mu$ L of vehicle-diluted AAV5 suspension  
289 ( $1 \times 10^{13}$  GC/mL) was slowly infused into mouse leptomeninges intracisternally and mice were  
290 allowed to rest for at least 2 weeks before further manipulation.

291

## 292 **Mouse single-cell proteogenomics.**

### 293 *Sample processing.*

294 *Cx3cr1*<sup>GFP/GFP</sup> *Ccr2*<sup>RFP/RFP</sup> mice were crossed with wild-type C56Bl/6 mice and the resulting  
295 female and male *Cx3cr1*<sup>+GFP</sup> *Ccr2*<sup>+RFP</sup> progeny was intracisternally infused with AAV and  
296 LLC LeptoM cancer cells, as described above and in fig. S15. Leptomeningeal cells from six  
297 animals *per* group were isolated and resuspended in Cell Staining Buffer (Biolegend  
298 #420201). In total, we profile leptomeningeal immune cells from 24 mice and 4 different  
299 conditions. To limit the non-specific antibody binding, cells from each mouse were incubated  
300 with TruStain FcX (Biolegend #101320), subsequently barcoded with TotalSeq-A anti-mouse  
301 hashtags 1 to 6 (Biolegend), listed in table S4, and washed. Cells from these six mice were  
302 then pooled, resulting in four independent samples, and stained with a custom TotalSeq-A  
303 panel (Biolegend) consisting of 198 antibodies targeting cell surface epitopes and non-  
304 targeting isotype controls, listed in table S5, to facilitate identification and origin of selected  
305 immune cell types (such as in fig. S17, H and I). Dead cells and debris were removed with  
306 LeviCell (LevitasBio), washed cells were counted, encapsulated with Chromium Single Cell  
307 3' GEM Library and Gel Bead Kit V3.1 (10x Genomics), and sequenced on NovaSeq 6000.  
308 Quality control plots are shown in fig. S15. Raw and pre-processed data are available  
309 through NCBI GEO under accession number GSE221593. Code for pre-processing and  
310 downstream analysis is available from corresponding author and will be deposited to GitHub  
311 after peer review.

312

### 313 *Data preprocessing and initial processing.*

314 Raw FASTQC files were pre-processed with SEQC<sup>2,3</sup> with modified mouse reference  
315 genome mm10 that included GFP, RFP and AmCyan sequences, and pre-processed as  
316 human samples, with the exception that no batch correction was applied. Each sample was  
317 processed separately. Cell filtering and doublet removal with DoubletDetection  
318 (*p\_thresh*=1e-16, *voter\_thresh*=0.5, *n\_iters*=25, *use\_phenograph*=False,  
319 *standard\_scaling*=True)<sup>4</sup> was performed as described above for human samples, we initially  
320 detected 54,781 cells and 20,804 genes and retained 46,852 high-quality cells and 18,277  
321 genes after filtering out low quality cells and non-immune cell populations. We detected  
322 ~1,387±866 genes per cell, ~4,374±5,483 gene counts per cells, out of which 3.15±2.62%  
323 were mitochondrial genes (values represent mean ± one standard deviation). Shannon  
324 entropy for this uncorrected mouse dataset was computed as described above for human  
325 data. AnnData files for each sample were then merged after filtering and doublet removal by  
326 an outer join. Erythrocyte genes (HBA-A1, HBB-BT, HBA-A2, HBB-BS, ALAS2, HBB-BT,



327 HP, and BPGM) and CD41 protein signal (platelet marker) were filtered out, in an addition to  
328 mitochondrial (prefix MT-) and ribosomal genes (prefix RPS- or RPL-). HTO and CITE-seq  
329 data were demultiplexed with cite-seq-count<sup>18</sup>, using default parameters applied on the  
330 whitelist of cells that passed the filtering step based on RNA quality, as described above.  
331 RNA and protein data (HTO and CITE) were integrated with totalVI, facilitating identification  
332 of immune cell subtypes using both gene and surface protein expression (default settings  
333 with top 4,000 HVG)<sup>19</sup>. HTOs were assigned based on maximum number of observed  
334 counts (as shown in fig. S15E). UMAP kNN graph and Leiden clustering<sup>6</sup> in this dataset was  
335 computed using sc.pp.neighbors<sup>10</sup> and totalVI processed latent variables. Leiden clusters  
336 were merged according to major cell types, which were assigned based on marker gene and  
337 surface protein expression, as showed in fig. S3. (HVG - highly variable genes).

338

339 *Subsetting of cells for downstream analyses, plotting and visualization.*

340 Plotting was performed using Scanpy (UMAP, tSNE, heatmaps)<sup>10</sup> and scVelo (UMAP,  
341 tSNE; this package was not used to infer RNA velocity)<sup>11</sup>. Embedding density was  
342 computed with sc.tl.embedding\_density (Fig. 2C). Cell cycle prediction was adapted from  
343 tl.score\_genes\_cell\_cycle (Fig. 4F and 5C)<sup>11</sup>. Subsetting was performed by selecting cell  
344 clusters from major populations, shown in Fig. 2B. We included cells from all four conditions,  
345 shown in fig. S15: cells isolated from naïve, vehicle-injected or LLC LeptoM-injected animals  
346 that were overexpressing *Egfp* (control gene) or *Ifng* specifically in the leptomeninges. For  
347 analysis of dendritic cells (DC), 'cDC' and 'pDC' clusters were subsetted, these cells were  
348 expressing CD11c (pan-DC marker) on cell surface. For analysis of natural killer cells (NK),  
349 'NK' and 'Proliferative T/NK' clusters were subsetted to ensure proper representation of all  
350 NK cells. These cells were reclustered with Leiden (resolution = 0.7), and clusters  
351 expressing CD3 and TCR $\beta$  cell surface markers were excluded, retaining only bona fide NK  
352 cells, characterized as Nk1.1<sup>+</sup> CD3<sup>-</sup> TCR $\beta$ <sup>-</sup>. For analysis of both cell types, we run Palantir  
353 (default settings - n\_components = 5, knn = 30) that allowed us to (i) compute diffusion  
354 components, used for tSNE re-embeddings and (ii) access MAGIC-imputed (Markov affinity-  
355 based graph imputation of cells) cell counts (Fig. 4C, 5A, and 5D)<sup>8,9</sup>. These imputed cell  
356 counts were used only for visualization with 2D plots. tSNE plots were re-fitted using  
357 multiscale coordinates that are based on diffusion components obtained with Palantir  
358 (n\_components=5, knn=30). Subsetted DCs were refitted onto tSNE using Palantir  
359 multiscale coordinates and annotated with initial Leiden loadings to identify four typical  
360 dendritic cell populations. We considered both gene expression data (shown as a heatmap  
361 in fig. S16A) and cell surface signals: cDC1 cells are Xcr1<sup>+</sup>, cDC2 cells are CD11b<sup>+</sup>, pDC  
362 cells are B220<sup>+</sup>, while CCR7<sup>+</sup> cells express *CCR7* gene (Fig. 4B and S17D). Subsetted NK

363 cells were refitted onto tSNE using Palantir multiscale coordinates and re-clustered with  
364 Leiden (resolution = 0.3), that resulted in identification of four putative cell states. Naïve NK  
365 cells expressed high cell surface levels of CD62L (encoded by *SELL* gene), while activated  
366 and proliferative cells had low CD62L levels. Proliferative cells also expressed genes  
367 associated with cell cycling, such as *MKI67*, *TOP2A*, and *HMGB2*. Senescent cells  
368 expressed CD55 and KLGR1 on their cell surface (Fig. 5B). Cancer cells, characterized by  
369 the expression of keratin genes and *CD63*, were subsetted as ‘cancer’ cluster and visualized  
370 with UMAP without re-embedding. Cancer cell gene signatures were computed with  
371 GSEAPy (fig. S17, B and C; cut-offs are provided in corresponding figure legends)  
372 (<https://github.com/zqfang/GSEAPy>).

373

#### 374 *Trajectory analysis.*

375 To predict the maturation trajectories of conventional dendritic cells in normal, non-perturbed  
376 steady-state mouse leptomeninges and leptomeninges with metastasis, we subsetted  
377 CD11c-positive cDC cells from naïve and cancer-bearing mice overexpressing *Egfp* only  
378 (‘cDC’ cluster and ‘*egfp*’ condition). We first used CellRank to identify putative trajectories  
379 without the need for initial or terminal state selection<sup>20</sup>. We filtered out genes present in less  
380 than 10 cells, normalized counts *per* cell and with  $\log(X+1)$  and extracted HVGs with  
381 Scanpy’s functions `sc.pp.filter_genes`, `sc.pp.normalize_total`, `sc.pp.log1p`, and  
382 `sc.pp.highly_variable_genes`. We retained 2,635 cells and 2,090 cDC-expressed HVG. We  
383 recomputed PCA with `sc.pp.pca` (`n_comps = 50`, `zero_centered = True`) and refitted the  
384 tSNE plot with top 9 diffusion components in multiscale space (`n_components=9`, `knn=15`),  
385 this tSNE map was used for further visualization. We used cytoTRACE kernel<sup>21</sup> that allowed  
386 us to assess plausible and biologically traceable cell transitions, following their trajectory  
387 from more primitive to mature cells. We imputed gene counts from normalized and filtered  
388 count matrix with `scv.pp.moments` with default parameters (`n_pcs = 30`, `n_neighbors = 30`)  
389 and initialized CellRank’s cytoTRACEkernel with default parameters. Transition matrix was  
390 computed (`threshold_scheme = hard`). Given that this approach provides qualitative insights  
391 into the transition matrix by iteratively choosing the next cell based on the current cell’s  
392 transition probabilities, we further compared two additional settings: (i) we did not specify  
393 from which cells or condition to select starting point (`start_ixs = None`), or (ii) we selected all  
394 cells from naïve *Egfp*-overexpressing mouse as the starting points. Both approaches  
395 identified CCR7+ DCs as mature endpoints, and to remain agnostic to the initiation, we  
396 continued the analysis without initial cells or states being defined (`n_sim = 100`). We used  
397 GPCCA estimator (Generalized Perron Cluster Cluster Analysis)<sup>22</sup> to coarse-grain a discrete  
398 Markov chain into a set of macrostates, and compute coarse-grained transition probabilities  
399 among the macrostates. We identified three macrostates and assigned each cell their



400 dominant microstate membership. These results suggested that the cDC2 population is  
401 prone to mature towards CCR7+ DCs, with insignificant contribution of cDC1 population  
402 (fig. S17, F to H). CellRank prediction was corroborated by analysis with Palantir  
403 ( $n\_components = 9$ ,  $knn = 15$ ,  $num\_waypoints = 500$ )<sup>9</sup> that identified cDC2 population as  
404 the one with the highest entropy (maturation potential), and this observation was robust to  
405 change in the number of diffusion components, neighbors, or waypoints (fig. S17, I and J).  
406 We dissected the cDC2-to-CCR7 DC transition axis and plotted smoothed gene trends  
407 along predicted Palantir pseudotime axis (Fig. 4D).

408

#### 409 **Bone marrow chimeras.**

410 Male C57Bl6-*Tyr*<sup>c-2</sup> mice were initially anesthetized with 2-3% isoflurane in medical air and  
411 restrained in ventilated conical plastic tubes. Animals were placed in a prone position and  
412 irradiated using X-RAD320 irradiator (Precision; North Branford, CT, USA) with the following  
413 settings: 250kV; 12mA; using 0.25 mm copper filter; distance of radiation source to the  
414 animal body: 50 cm; irradiation field: 20 × 20 cm; dose rate: 117.5 cGy/min. Five animals  
415 were fitted into the radiation field and received and two cycles of 5.5 Gy total body radiation  
416 6 hours apart. Immediately after completion of the irradiation procedure, animals were  
417 returned to their cages and fed with sulfatrim-enriched diet for the duration of this  
418 experiment. Within 24 hours, mice were retro-orbitally infused with approximately  $1 \times 10^7$  bone  
419 marrow cells from multiple pooled wild-type or *Zbtb46*-DTR<sup>+/+</sup> C57Bl/6 donors. Bone marrow  
420 cells were sterilely isolated from *femur* and *tibia*. Inner bone marrow was exposed and  
421 placed inside a 0.6 mL PCR tube with small hole punched in the bottom. The PCR tube was  
422 placed in 1.5 mL microcentrifuge tube and the samples were spun down to collect and pellet  
423 the bone marrow cells. Cells were counted and resuspended in sterile PBS.

424

#### 425 **Immune cell depletions.**

426 Monocyte-macrophages were depleted with rat anti-mouse CSF1R antibody (Bio X Cell  
427 #BE0213), rat IgG2a isotype was used as control (Bio X Cell #BE0089). Antibodies were  
428 diluted in sterile pH 7.0 (BioXCell #IP0070) and delivered intraperitoneally. An initial dose  
429 of 400 µg was injected one day before cancer cell implantation, followed by tri-weekly  
430 injection of 200 µg. Monocyte-macrophages were also independently depleted with anionic  
431 clodronate liposomes, vehicle-containing liposomes were used as control (Clophosome®-A  
432 and Control Liposomes, FormuMax Scientific #F70101C-AC-10). Liposomes were delivered  
433 retro-orbitally. Initial dose of 200 µL was injected one day before cancer cell implantation,  
434 followed by bi-weekly injection of 100 µL. cDC progenitors were depleted in bone marrow  
435 chimeras that received wild-type or *Zbtb46*-DTR<sup>+/+</sup> donor cells with diptheria toxin (DTx; Sigma

436 #D0564), diluted in PBS, and delivered intraperitoneally. Initial dose of 400 ng was injected  
437 one day before cancer cell implantation, followed by bi-weekly injection of 100 ng. Both wild-  
438 type and *Zbtb46*-DTR<sup>+/+</sup> cohorts were receiving DTx. NK cells were depleted with polyclonal  
439 rabbit anti-mouse asialo GM1 (Poly21460; Biolegend #146002), rabbit polyclonal IgG was  
440 used as control (Invitrogen #02-610-2). Both antibodies were reconstituted with PBS. Initial  
441 dose of 50 µg was instilled one day before cancer cell implantation, followed by bi-weekly  
442 injections of 50 µg.

443

#### 444 **Flow cytometry.**

445 Single-cell suspensions were prepared as described above and in <sup>1</sup>. After filtering through 70-  
446 micron filter and washing with 2 mM EDTA and 1% BSA in PBS, nonspecific binding sites  
447 were blocked with TruStain FcX (Biolegend #101320) diluted in PBS, supplemented with  
448 10% rat serum (Sigma #R9759) for 10 min on ice. Antibodies against surface antigens were  
449 diluted in reconstituted Brilliant Stain Buffer Plus (BD #566385), supplemented with 5% rat  
450 serum. Surface antigens were stained for 15 min on ice. LIVE/DEAD Green/Violet/FarRed  
451 Dead Cell Stain kits (Life Technologies #L34969, L34963, L34973, respectively), DAPI  
452 (Molecular Probes #D1306) or propidium iodide (Thermo Fisher #P3566) were used as  
453 viability stains. Buffer without BSA was used before LIVE/DEAD staining, which was  
454 performed for 15 min on ice. Red blood cells were lysed with 1X ACK buffer or 1x  
455 eBioscience RBC Lysis Buffer (Invitrogen #00-4300-54) for 5 min at ambient temperature.  
456 For cytokine production analysis, leptomenigeal isolates were resuspended in serum-free  
457 IMDM and incubated (MSKCC Media Core) with or without addition of brefeldin A (Biolegend  
458 # 420601), ionomycin (StemCell Technologies # 73722), and phorbol 12-myristate 13-  
459 acetate (PMA; Invivogen # tlr1-pma), for 2 hours at 37°C. Where the intracellular staining was  
460 performed, cells were further fixed with IC Fixation Buffer for 20 min (Invitrogen, 00-8222-49)  
461 at room temperature, permeabilized and stained with antibodies against intracellular markers  
462 in 1x Permeabilization Buffer for 1 h (Invitrogen, 00-8333-56) and analysed. For pSTAT1  
463 transcription factor staining, cells were processed using True-Nuclear Buffer Set (Biolegend  
464 #424401) or FOXP3 Fix/Perm Buffer Set (Biolegend #421403) and analysed. MHC class I  
465 levels of vehicle- or recombinant mouse IFN-γ-exposed (Biolegend #714006) cells *in vitro*  
466 was measured 24 hours after treatment. Data was recorded using LSR Fortessa (BD).  
467 Gating and analysis was performed essentially as described in <sup>1,23</sup>, using unstained samples,  
468 isotype-stained samples, and/or FMO controls. Antibodies used for flow cytometry are listed  
469 in table S6.

470

#### 471 **Soluble protein detection in plasma and CSF.**

472 Solute analytes in the human and mouse CSF were analyzed using following multiplexed  
473 bead arrays, used as recommended by the manufacturer: LEGENDPlex mouse anti-virus  
474 response (Biolegend #740622), LEGENDPlex human CD8/NK panel (Biolegend #740267).

475

#### 476 **NK cell *in vitro* survival assay.**

477 NK cells were enriched from dissociated spleens of female and male C57Bl/6 mice with  
478 MojoSort mouse NK cell isolation kit (Biolegend #480049). Approximately 20,000 cells were  
479 seeded into 1:1 mixture of HG DME and human CSF from cancer patients without LM,  
480 containing 10 ng/mL recombinant human IL2 (Biolegend #589102), into 96-well plate. Cells  
481 were incubated for 24 h with or without the addition of 1 ng/mL or recombinant mouse  
482 IL12p70 (Biolegend #577002) and recombinant mouse IL15 (PeproTech #210-15-10ug).  
483 Viability and cell counts were assessed with cytometry.

484

#### 485 **Histology.**

486 Tissue from euthanized mice was fixed in 10% formalin overnight, thoroughly washed in tap  
487 water, sliced, and stored in 70% ethanol until embedded into paraffin. Paraffin-embedded  
488 blocks were then cut into 5 micron thick sections and placed onto microscopic slides.  
489 Hematoxylin & eosin (H&E) stains were performed by MSKCC Molecular Cytology Core.  
490 Myelin stain was performed with Luxol Fast Blue stain kit (Abcam #ab150675).  
491 Immunofluorescence was performed as described in <sup>1</sup>, using following primary antibodies:  
492 CD11c (hamster, 1:50, Novus #NBP1-06651 and #NB110-97871, used in combination);  
493 Cleaved Caspase 3 (rabbit, 1:200, Cell Signaling Technology #9661S); CNPase (mouse,  
494 1:1000, Abcam #ab6319); DCX (sheep, 1:200, R&D #AF10025); GFAP (goat, 1:500, Abcam  
495 #ab53554); Iba1 (rabbit, 1:500, Invitrogen #PA5-27436; and goat, 1:500, Novus #NB100-  
496 1028), MBP (mouse, 1:100, R&D #MAB42282); NeuN (mouse, 1:100-1:500, Sigma  
497 #MAB377); Olig2 (goat, 1:200, R&D #AF2418). AF488-, Cy3-, and AF647-conjugated, anti-  
498 mouse, goat, rabbit, and sheep secondary antibodies were obtained from Jackson  
499 ImmunoResearch; AF647-conjugated anti-hamster secondary antibody was obtained from  
500 Abcam. For antibodies of murine origin applied on mouse tissue, the endogenous IgG was  
501 first blocked with reconstituted VisUBlock Mouse (R&D #VB001-01ML). DAPI (Molecular  
502 Probes #D1306) was used as nuclear counterstain. Autofluorescence was quenched with  
503 Vector TrueView (Vector Laboratories #sp-8400). Slides were scanned with Mirax slide  
504 scanner (Zeiss), and images for further analysis were exported with CaseViewer  
505 (3DHISTECH).

506

#### 507 **Quantification of immunofluorescence imaging.**

508 Quantification of Iba1+ myeloid cells in choroid plexus was performed essentially as  
509 described in <sup>24</sup>. Cleaved Caspase 3-positive cells in cancer plaques and clusters in  
510 leptomeninges were counted manually in FOVs of approximately equal size. Cancer plaques  
511 in timepoint-matched *AVV5-Ifrng* animals are rare; 2-3 FOVs per brain were extracted and  
512 the exact animal sample size and number of FOVs is stated in the corresponding images.  
513 Analysis of NeuN was done in the motor and somatosensory cortex in two regions. Region  
514 #1 covers layers 1-4 and region #2 covers layer 5 and 6. One section per animal was  
515 analysed and the chosen sections were spanning levels -0.18 to -0.196 relative to bregma.  
516 Olig2 was quantified in the *corpus callosum*, spanning a lateral area from 0-1.7 mm relative  
517 to bregma; and together with CNPase in also in subcortical and cortical region above *corpus*  
518 *callosum*. All image analyses were performed in Fiji/ImageJ <sup>25</sup>.

519

### 520 **Statistical analysis and reproducibility.**

521 Plotting and statistical analysis was performed with Prism 8.1.0 (GraphPad Software), using  
522 Mann-Whitney U test, unless specified otherwise. In the box plots (box & whisker plots), box  
523 extends from 25<sup>th</sup> to 75<sup>th</sup> percentile and whiskers show minimum to maximum values.  
524 Results from single-cell analyses were plotted in Python. Bulk RNA-seq was processed in R  
525 Studio. All mouse experiments are from at least two independent repetitions, except for fig.  
526 S6, C and D; fig. S8, G to I; fig. S9J; fig. S13H; and fig. S20C. Whenever possible, mice  
527 were randomly allocated into treatment groups. This was not possible in experiments with  
528 transgenic animals. Investigators were not blinded to genotype or treatment over the course  
529 of experiment. Sample size and exact *P* values are included in figures. Sample sizes were  
530 not pre-determined. Critical mouse experiments (Fig. 2 and 3) were reproduced by two  
531 independent investigators. Animal exclusion criteria for animal experiments (death within  
532 three days of injection or appearance of pigmented spots that interfered with BLI) are  
533 described above. No human samples were excluded from analyses.

534

### 535 **Supplementary References.**

- 536 1 Chi, Y. *et al.* Cancer cells deploy lipocalin-2 to collect limiting iron in leptomeningeal  
537 metastasis. *Science* **369**, 276-282 (2020). <https://doi.org/10.1126/science.aaz2193>
- 538 2 Azizi, E. *et al.* Single-Cell Map of Diverse Immune Phenotypes in the Breast Tumor  
539 Microenvironment. *Cell* **174**, 1293-1308 e1236 (2018).  
540 <https://doi.org/10.1016/j.cell.2018.05.060>
- 541 3 Chan, J. M. *et al.* Signatures of plasticity, metastasis, and immunosuppression in an  
542 atlas of human small cell lung cancer. *Cancer Cell* **39**, 1479-1496 e1418 (2021).  
543 <https://doi.org/10.1016/j.ccell.2021.09.008>

- 544 4 Gayoso, A., Shor, J., Carr, A.J., Sharma, R., Pe'er, D. DoubletDetection (Version  
545 v3.0). *Zenodo* (2020). <https://doi.org/http://doi.org/10.5281/zenodo.2678041>
- 546 5 Hie, B., Bryson, B. & Berger, B. Efficient integration of heterogeneous single-cell  
547 transcriptomes using Scanorama. *Nat Biotechnol* **37**, 685-691 (2019).  
548 <https://doi.org/10.1038/s41587-019-0113-3>
- 549 6 Traag, V. A., Waltman, L. & van Eck, N. J. From Louvain to Leiden: guaranteeing  
550 well-connected communities. *Sci Rep* **9**, 5233 (2019).  
551 <https://doi.org/10.1038/s41598-019-41695-z>
- 552 7 Chan, J. M. *et al.* Lineage plasticity in prostate cancer depends on JAK/STAT  
553 inflammatory signaling. *Science* **377**, 1180-1191 (2022).  
554 <https://doi.org/10.1126/science.abn0478>
- 555 8 van Dijk, D. *et al.* Recovering Gene Interactions from Single-Cell Data Using Data  
556 Diffusion. *Cell* **174**, 716-729 e727 (2018). <https://doi.org/10.1016/j.cell.2018.05.061>
- 557 9 Setty, M. *et al.* Characterization of cell fate probabilities in single-cell data with  
558 Palantir. *Nat Biotechnol* **37**, 451-460 (2019). [https://doi.org/10.1038/s41587-019-](https://doi.org/10.1038/s41587-019-0068-4)  
559 [0068-4](https://doi.org/10.1038/s41587-019-0068-4)
- 560 10 Wolf, F. A., Angerer, P. & Theis, F. J. SCANPY: large-scale single-cell gene  
561 expression data analysis. *Genome Biol* **19**, 15 (2018).  
562 <https://doi.org/10.1186/s13059-017-1382-0>
- 563 11 Bergen, V., Lange, M., Peidli, S., Wolf, F. A. & Theis, F. J. Generalizing RNA velocity  
564 to transient cell states through dynamical modeling. *Nat Biotechnol* **38**, 1408-1414  
565 (2020). <https://doi.org/10.1038/s41587-020-0591-3>
- 566 12 Remsik, J. *et al.* Inflammatory Leptomeningeal Cytokines Mediate COVID-19  
567 Neurologic Symptoms in Cancer Patients. *Cancer Cell* **39**, 276-283 e273 (2021).  
568 <https://doi.org/10.1016/j.ccell.2021.01.007>
- 569 13 Boire, A. *et al.* Complement Component 3 Adapts the Cerebrospinal Fluid for  
570 Leptomeningeal Metastasis. *Cell* **168**, 1101-1113 e1113 (2017).  
571 <https://doi.org/10.1016/j.cell.2017.02.025>
- 572 14 Remsik, J. *et al.* TGF-beta regulates Sca-1 expression and plasticity of pre-  
573 neoplastic mammary epithelial stem cells. *Sci Rep* **10**, 11396 (2020).  
574 <https://doi.org/10.1038/s41598-020-67827-4>
- 575 15 Remsik, J. *et al.* Leptomeningeal metastatic cells adopt two phenotypic states.  
576 *Cancer Rep (Hoboken)* **5**, e1236 (2022). <https://doi.org/10.1002/cnr2.1236>
- 577 16 Putri, G. H., Anders, S., Pyl, P. T., Pimanda, J. E. & Zanini, F. Analysing high-  
578 throughput sequencing data in Python with HTSeq 2.0. *Bioinformatics* **38**, 2943-2945  
579 (2022). <https://doi.org/10.1093/bioinformatics/btac166>

- 580 17 Love, M. I., Huber, W. & Anders, S. Moderated estimation of fold change and  
581 dispersion for RNA-seq data with DESeq2. *Genome Biol* **15**, 550 (2014).  
582 [https://doi.org:10.1186/s13059-014-0550-8](https://doi.org/10.1186/s13059-014-0550-8)
- 583 18 Roelli, P., Flynn, B., Gui, G. Hoohm/CITE-seq-Count: 1.4.2 (Version 1.4.2). *Zenodo*  
584 (2019). [https://doi.org:https://doi.org/10.5281/zenodo.2590196](https://doi.org/https://doi.org/10.5281/zenodo.2590196)
- 585 19 Gayoso, A. *et al.* Joint probabilistic modeling of single-cell multi-omic data with  
586 totalVI. *Nat Methods* **18**, 272-282 (2021). [https://doi.org:10.1038/s41592-020-01050-](https://doi.org/10.1038/s41592-020-01050-x)  
587 [x](https://doi.org/10.1038/s41592-020-01050-x)
- 588 20 Lange, M. *et al.* CellRank for directed single-cell fate mapping. *Nat Methods* **19**, 159-  
589 170 (2022). [https://doi.org:10.1038/s41592-021-01346-6](https://doi.org/10.1038/s41592-021-01346-6)
- 590 21 Gulati, G. S. *et al.* Single-cell transcriptional diversity is a hallmark of developmental  
591 potential. *Science* **367**, 405-411 (2020). [https://doi.org:10.1126/science.aax0249](https://doi.org/10.1126/science.aax0249)
- 592 22 Reuter, B., Weber, M., Fackeldey, K., Roblitz, S. & Garcia, M. E. Generalized Markov  
593 State Modeling Method for Nonequilibrium Biomolecular Dynamics: Exemplified on  
594 Amyloid beta Conformational Dynamics Driven by an Oscillating Electric Field. *J*  
595 *Chem Theory Comput* **14**, 3579-3594 (2018).  
596 [https://doi.org:10.1021/acs.jctc.8b00079](https://doi.org/10.1021/acs.jctc.8b00079)
- 597 23 Remsik, J. *et al.* Plasticity and intratumoral heterogeneity of cell surface antigen  
598 expression in breast cancer. *Br J Cancer* **in press** (2018).
- 599 24 Cui, J. *et al.* Inflammation of the Embryonic Choroid Plexus Barrier following Maternal  
600 Immune Activation. *Dev Cell* **55**, 617-628 e616 (2020).  
601 [https://doi.org:10.1016/j.devcel.2020.09.020](https://doi.org/10.1016/j.devcel.2020.09.020)
- 602 25 Schindelin, J. *et al.* Fiji: an open-source platform for biological-image analysis. *Nat*  
603 *Methods* **9**, 676-682 (2012). [https://doi.org:10.1038/nmeth.2019](https://doi.org/10.1038/nmeth.2019)
- 604



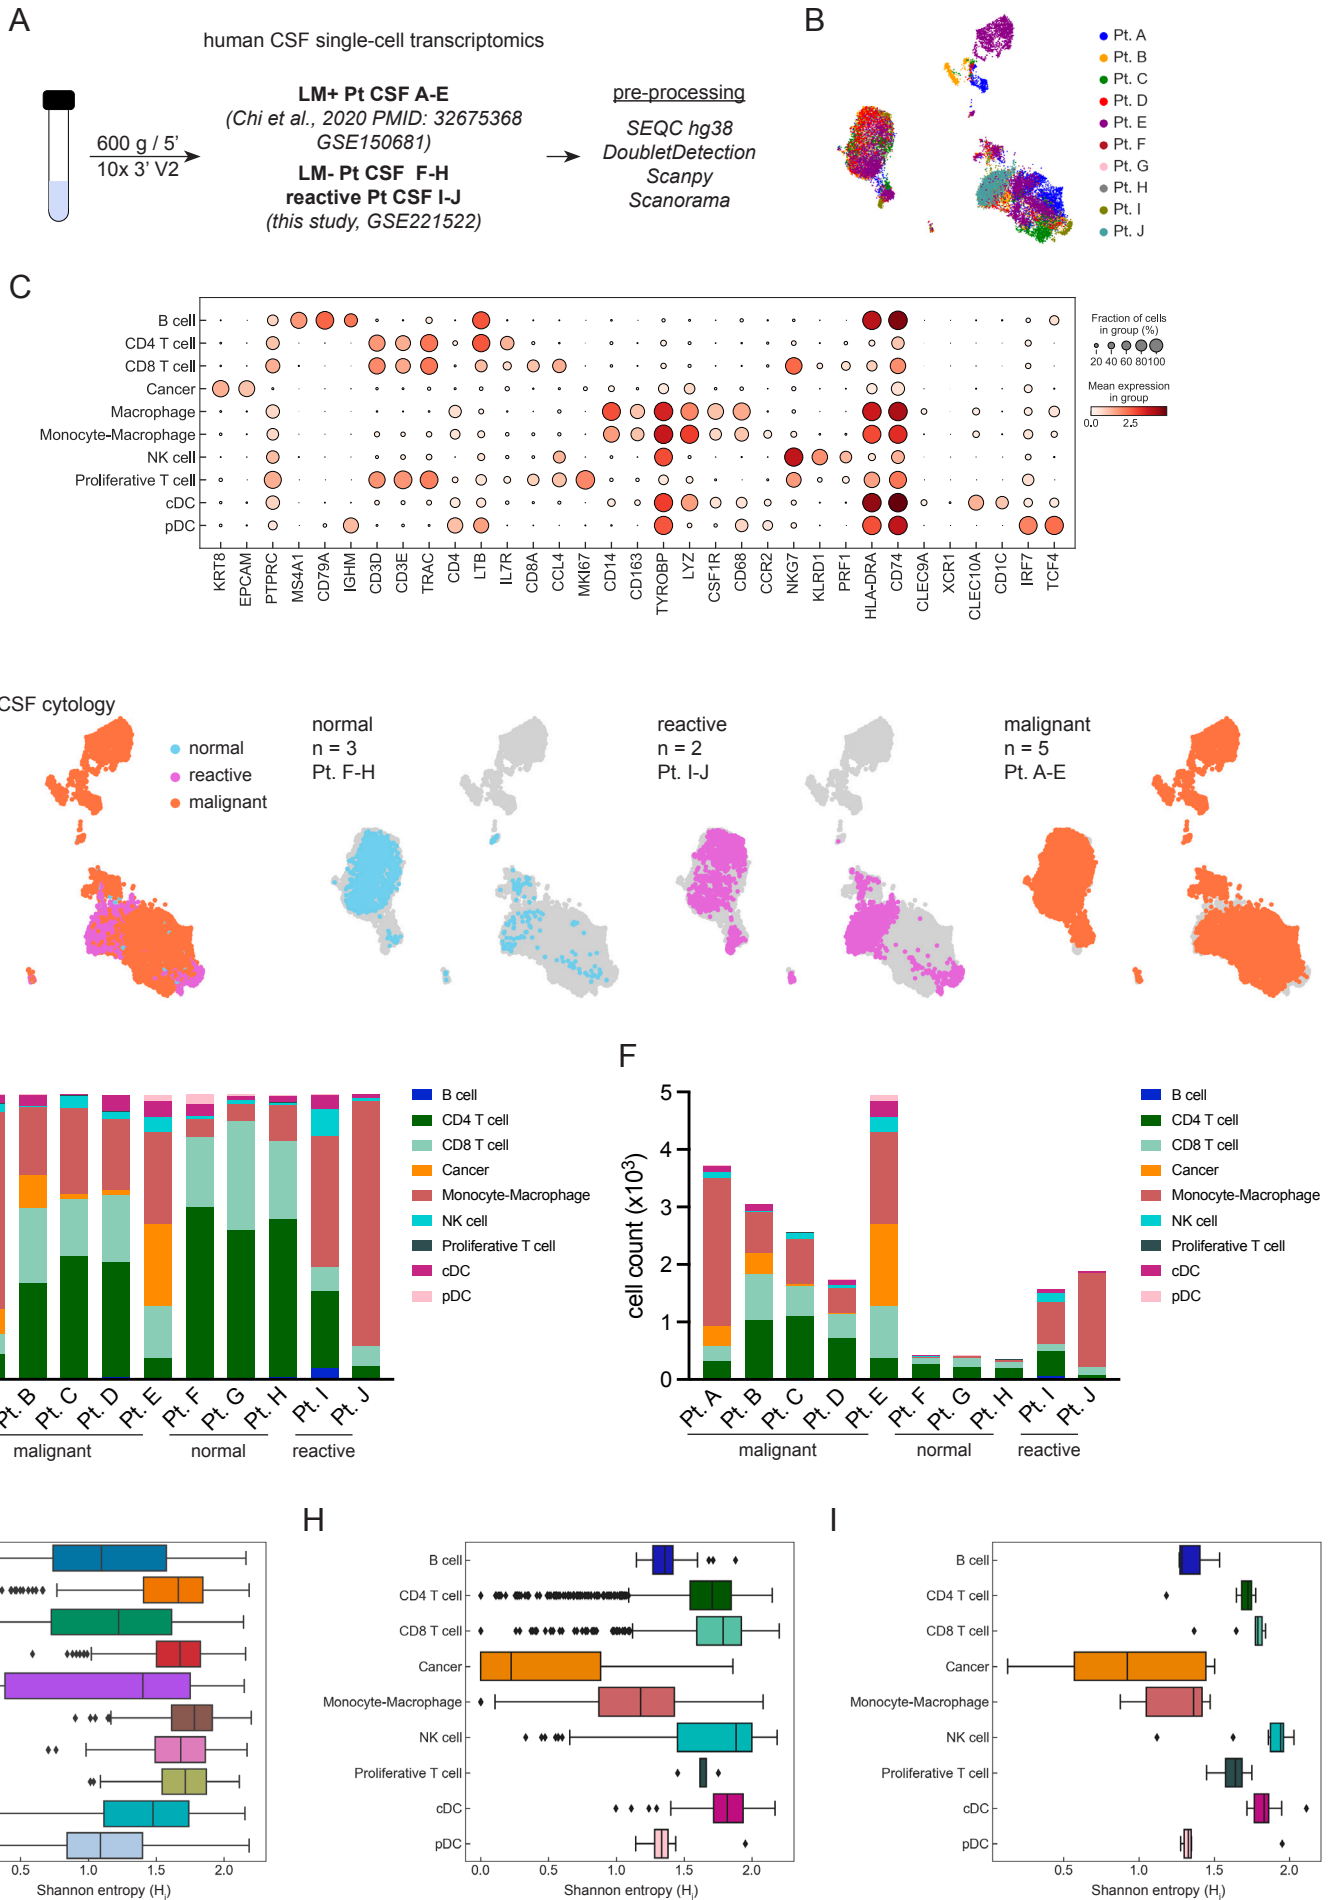

1 **Fig. S1. Single-cell transcriptomics of normal, reactive, and malignant human CSF**

2

3 (A) Experimental overview of human CSF single-cell transcriptomics. Single-cell RNA-seq data  
4 from five LM+ patients with malignant cytology was retrieved from GSE150660 and integrated  
5 with previously unpublished data from three patients with negative cytology and two patients  
6 whose CSF contained reactive cells. All samples were processed within the same timeframe.  
7 For details, see Methods and panels B to I.

8

9 (B) UMAP of human CSF cells colored by individual patient (n = 20,676 cells from n = 10  
10 patients).

11

12 (C) Expression of cell type-specific marker genes in human CSF single-cell dataset.

13

14 (D) UMAP of human CSF immune cell types and cancer cells grouped based on cytology, and  
15 UMAPs of individual cytologies projected separately. Normal: n = 3 patients and n = 1,196 cells;  
16 Reactive: n = 2 patients and n = 3,458 cells; Malignant: n = 5 patients and n = 16,022 cells.

17

18 (E) Proportion of major cell types in the individual patients.

19

20 (F) Cell counts of major cell types in the individual patients.

21

22 (G) Inter-patient heterogeneity measured with Shannon entropy in subsampled dataset, where  
23 we randomly selected up to 500 cells per patient. For each cell, the Shannon entropy measures  
24 the sample diversity of its nearest neighbors in the kNN graph.

25

26 (H) Inter-sample heterogeneity measured with Shannon entropy in subsampled dataset.

27

28 (I) Inter-sample heterogeneity measured with Shannon entropy in subsampled dataset,  
29 averaged *per* cell type and *per* patient.

30



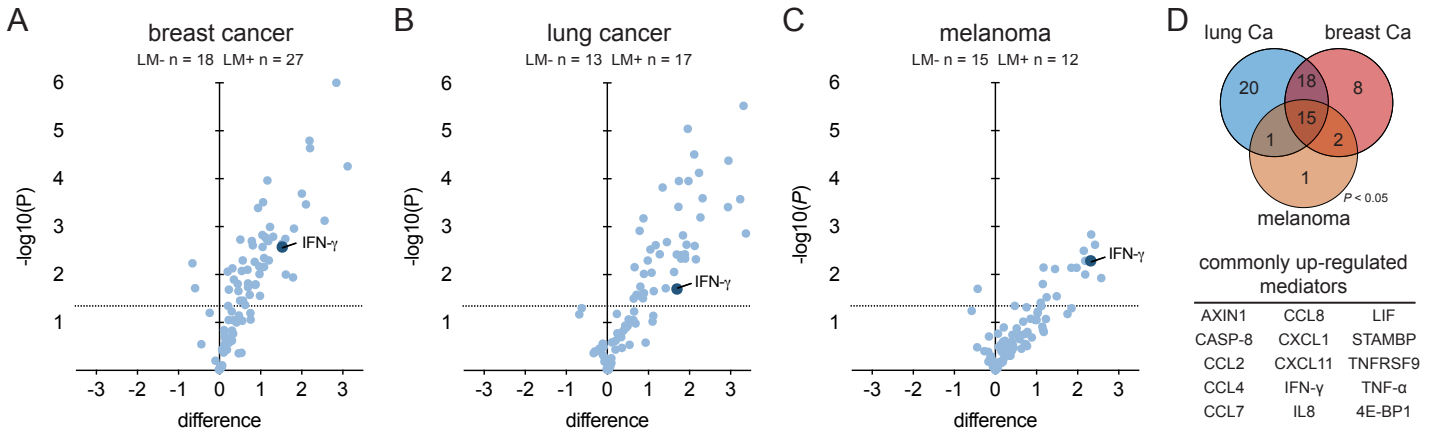

31 **Fig. S2. Targeted proteomics with proximity extension assay of inflammatory mediators**  
32 **in human CSF**

33 **(A)** Targeted proteomic analysis of 92 inflammatory mediators in CSF of breast cancer patients  
34 without and with LM by proximity extension assay (multiple t tests).

35 **(B)** Targeted proteomic analysis of 92 inflammatory mediators in CSF of lung cancer patients  
36 without and with LM by proximity extension assay (multiple t tests).

37 **(C)** Targeted proteomic analysis of 92 inflammatory mediators in CSF of melanoma patients  
38 without and with LM by proximity extension assay (multiple t tests).

39 **(D)** Overlap of inflammatory mediators significantly enriched in CSF of LM+ patients, plotted *per*  
40 primary cancer type (Venn diagram, top panel). Overview of 15 proteins enriched in CSF from  
41 LM+ patients and all three cancer types.

42

| Cell line (& host strain) | Cancer type                             | Generated line | Leptomeningeal tropism | Parenchymal tropism | Ref.                                         |
|---------------------------|-----------------------------------------|----------------|------------------------|---------------------|----------------------------------------------|
| LLC (C57Bl/6)             | non-small cell lung Ca                  | Parental       | -                      | +                   | Boire <i>et al.</i> , 2017<br>PMID: 28283064 |
|                           |                                         | LeptoM         | +++                    | -                   |                                              |
|                           |                                         | BrM2           | -                      | ++                  |                                              |
| B16-F10 (C57Bl/6)         | melanoma ( $\Delta Ink4a/Arf$ )         | Parental       | ++                     | +                   | <i>this study</i>                            |
|                           |                                         | LeptoM         | ++                     | +                   |                                              |
|                           |                                         | BrM2           | +                      | ++                  |                                              |
| Yumm5.2 (C57Bl/6)         | melanoma ( $Trp53^{null}/Braf^{600E}$ ) | Parental       | -                      | -                   | <i>this study</i>                            |
|                           |                                         | LeptoM         | +                      | -                   |                                              |
|                           |                                         | BrM2           | -                      | +                   |                                              |
| E0771 (C57Bl/6)           | triple-negative/ luminal breast Ca      | Parental       | -                      | -/+                 | <i>this study</i>                            |
|                           |                                         | LeptoM         | +++                    | -                   |                                              |
|                           |                                         | BrM2           | -                      | +++                 |                                              |
| EMT6 (BALB/c)             | triple-negative breast Ca               | Parental       | -                      | +                   | <i>this study</i>                            |
|                           |                                         | LeptoM         | +++                    | +                   |                                              |
|                           |                                         | BrM2           | -                      | +++                 |                                              |
| 4T1 (BALB/c)              | triple-negative breast Ca               | Parental       | -                      | +                   | <i>this study</i>                            |
|                           |                                         | LeptoM         | +++                    | +                   |                                              |
|                           |                                         | BrM2           | -                      | +++                 |                                              |

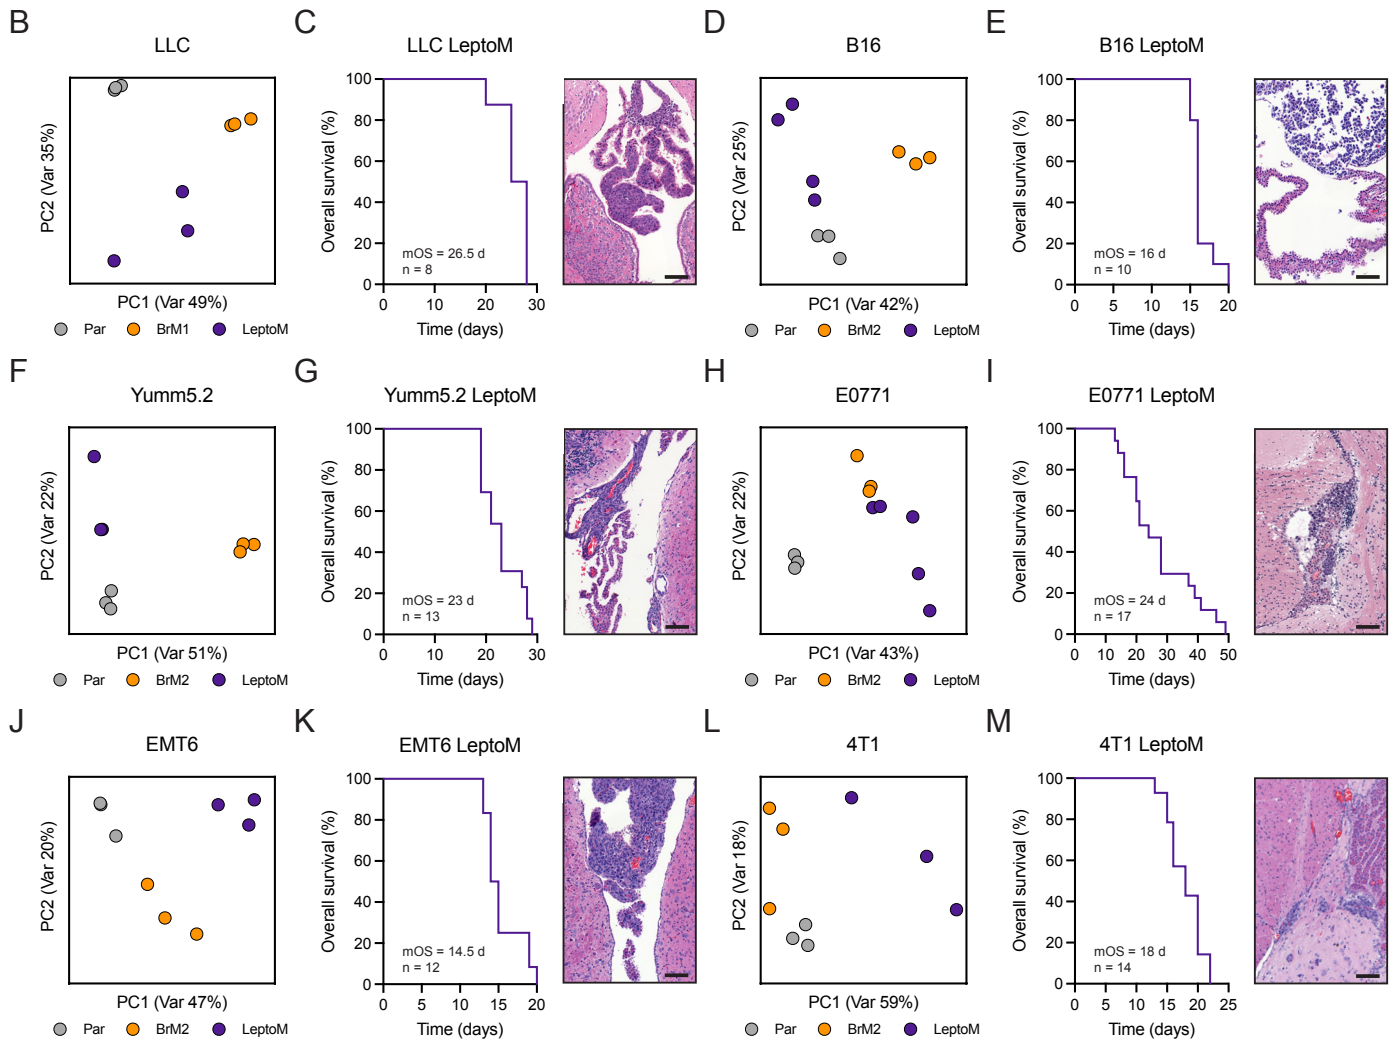

Remsik et al., Supplementary Figure 3

43 **Fig. S3. Immunocompetent mouse models of leptomeningeal metastasis**

44

45 (A) Overview of cancer cells lines used and generated in this study.

46

47 (B) Principal component analysis (PCA) of *in vitro* transcriptome of Parental (gray, n = 3),  
48 LeptoM (purple, n = 3), and BrM1 (orange, n = 3) LLC cells. Retrieved from NCBI GEO  
49 GSE83132.

50

51 (C) Kaplan-Meier plot showing survival of C57Bl/6-*Tyr<sup>c-2</sup>* animals overexpressing *Egfp* in the  
52 leptomeninges after delivery of LLC LeptoM cells into *cisterna magna* (related to fig. S10).  
53 Representative brain tissue sections stained with H&E showing colonization of leptomeninges  
54 after intracardiac delivery of LLC LeptoM cells (scale bar = 100  $\mu$ m). mOS - median overall  
55 survival.

56

57 (D) Principal component analysis (PCA) of *in vitro* transcriptome of Parental (gray, n = 3) and  
58 newly established LeptoM (purple, n = 4), and BrM2 (orange, n = 3) B16 cells.

59

60 (E) Kaplan-Meier plot showing survival of C57Bl/6 animals overexpressing *Egfp* in the  
61 leptomeninges after delivery of B16 LeptoM cells into *cisterna magna* (related to fig. S10).  
62 Representative brain tissue sections stained with H&E showing colonization of leptomeninges  
63 after intracardiac delivery of B16 LeptoM cells (scale bar = 100  $\mu$ m). mOS - median overall  
64 survival.

65

66 (F) Principal component analysis (PCA) of *in vitro* transcriptome of Parental (gray, n = 3) and  
67 newly established LeptoM (purple, n = 3), and BrM2 (orange, n = 3) Yumm5.2 cells.

68

69 (G) Kaplan-Meier plot showing survival of C57Bl/6 and C57Bl/6-*Tyr<sup>c-2</sup>* animals overexpressing  
70 *Egfp* in the leptomeninges after delivery of Yumm5.2 LeptoM cells into *cisterna magna* (related  
71 to fig. S10). Representative brain tissue sections stained with H&E showing colonization of  
72 leptomeninges after intracardiac delivery of Yumm5.2 LeptoM cells (scale bar = 100  $\mu$ m). mOS -  
73 median overall survival.

74

75 (H) Principal component analysis (PCA) of *in vitro* transcriptome of Parental (gray, n = 3) and  
76 newly established LeptoM (purple, n = 5), and BrM2 (orange, n = 3) E0771 cells.

77

78 (I) Kaplan-Meier plot showing survival of C57Bl/6-*Tyr<sup>c-2</sup>* animals overexpressing *Egfp* in the  
79 leptomeninges after delivery of E0771 LeptoM cells into *cisterna magna* (related to fig. S10).  
80 Representative brain tissue sections stained with H&E showing colonization of leptomeninges  
81 after intracardiac delivery of E0771 LeptoM cells (scale bar = 100  $\mu$ m). mOS - median overall  
82 survival.

83

84 (J) Principal component analysis (PCA) of *in vitro* transcriptome of Parental (gray, n = 3) and  
85 newly established LeptoM (purple, n = 3), and BrM2 (orange, n = 3) EMT6 cells.

86

87 (K) Kaplan-Meier plot showing survival of BALB/c animals overexpressing *Egfp* in the  
88 leptomeninges after delivery of EMT6 LeptoM cells into *cisterna magna* (related to fig. S10).  
89 Representative brain tissue sections stained with H&E showing colonization of leptomeninges  
90 after intracardiac delivery of EMT6 LeptoM cells (scale bar = 100  $\mu$ m). mOS - median overall  
91 survival.

92

93 (L) Principal component analysis (PCA) of *in vitro* transcriptome of Parental (gray, n = 3) and  
94 newly established LeptoM (purple, n = 3), and BrM2 (orange, n = 3) 4T1 cells.

95

96 (M) Kaplan-Meier plot showing survival of BALB/c animals overexpressing *Egfp* in the  
97 leptomeninges after delivery of 4T1 LeptoM cells into *cisterna magna* (related to fig. S10).  
98 Representative brain tissue sections stained with H&E showing colonization of leptomeninges  
99 after intracardiac delivery of 4T1 LeptoM cells (scale bar = 100  $\mu$ m). mOS - median overall  
100 survival.

101

A

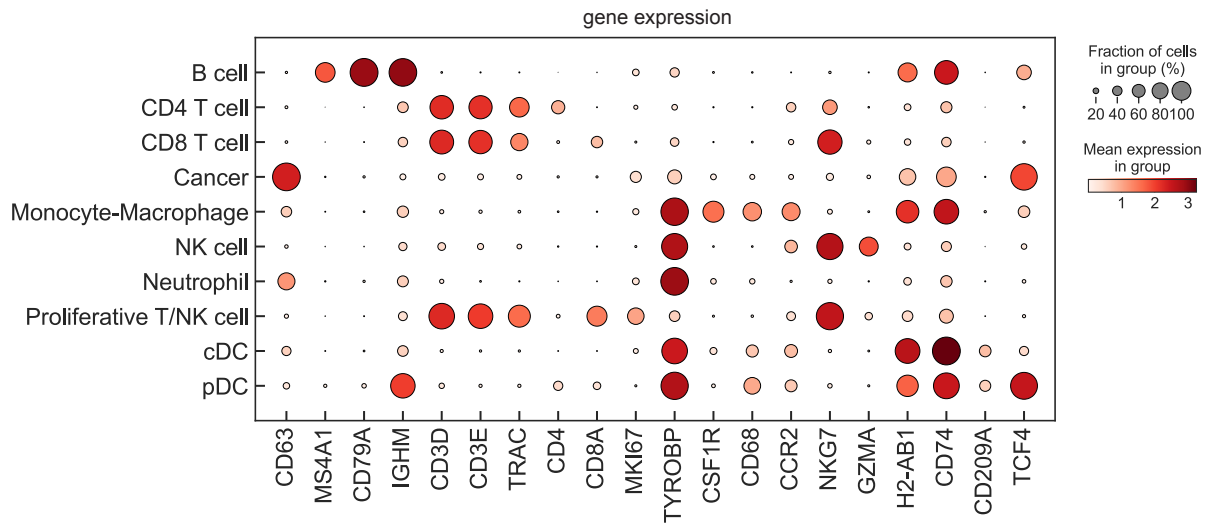

B

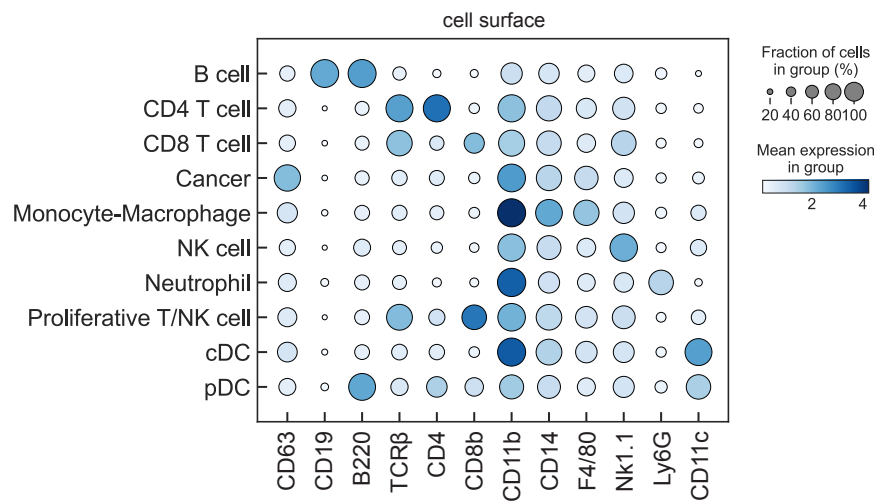

102 **Fig. S4. Cell type annotation of mouse leptomeningeal immune cells**

103

104 (A) Expression of cell type-specific marker genes in mouse proteogenomic single-cell dataset,  
105 as captured with single-cell RNA-seq.

106

107 (B) Expression of cell type-specific surface markers in mouse proteogenomic single-cell  
108 dataset, as determined with CITE-seq.

109

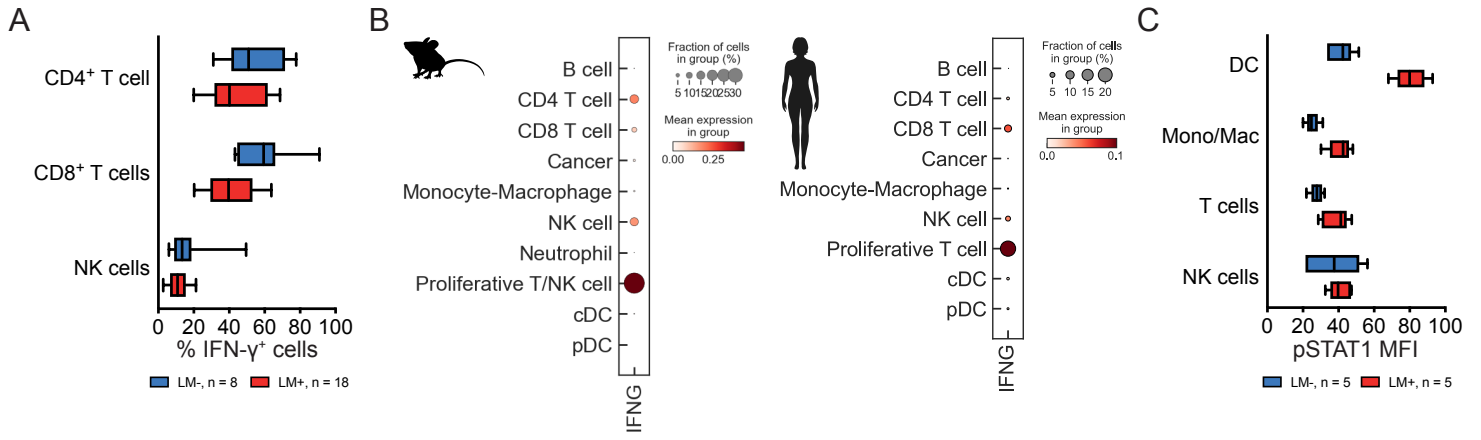



110 **Fig. S5. IFN- $\gamma$  production and response in leptomeninges**

111

112 **(A)** Proportion of T cells (CD3<sup>+</sup>CD4<sup>+</sup>CD8<sup>-</sup> vs. CD3<sup>+</sup>CD4<sup>-</sup>CD8<sup>+</sup>) and NK cells (CD3<sup>-</sup>Nk1.1<sup>+</sup>)  
113 expressing IFN- $\gamma$  in cells isolated from vehicle- or B16, E0771, and LLC LeptoM-injected mice,  
114 determined with flow cytometry.

115

116 **(B)** Expression of *IFNG* gene in mouse (left) and human (right) single-cell datasets.

117

118 **(C)** Abundance of phosphorylated STAT1 (pSTAT1) in leptomeningeal dendritic cells (MHC II<sup>+</sup>  
119 CD11c<sup>+</sup>), monocyte-macrophages (CD11b<sup>+</sup>Ly6C<sup>+</sup> and CD11b<sup>+</sup>F4/80<sup>+</sup>), T cells (CD3<sup>+</sup>), and NK  
120 cells (Nk1.1<sup>+</sup>), as a proxy for IFN- $\gamma$  pathway activation in vehicle- and LLC LeptoM-injected  
121 mice, determined with flow cytometry.

122

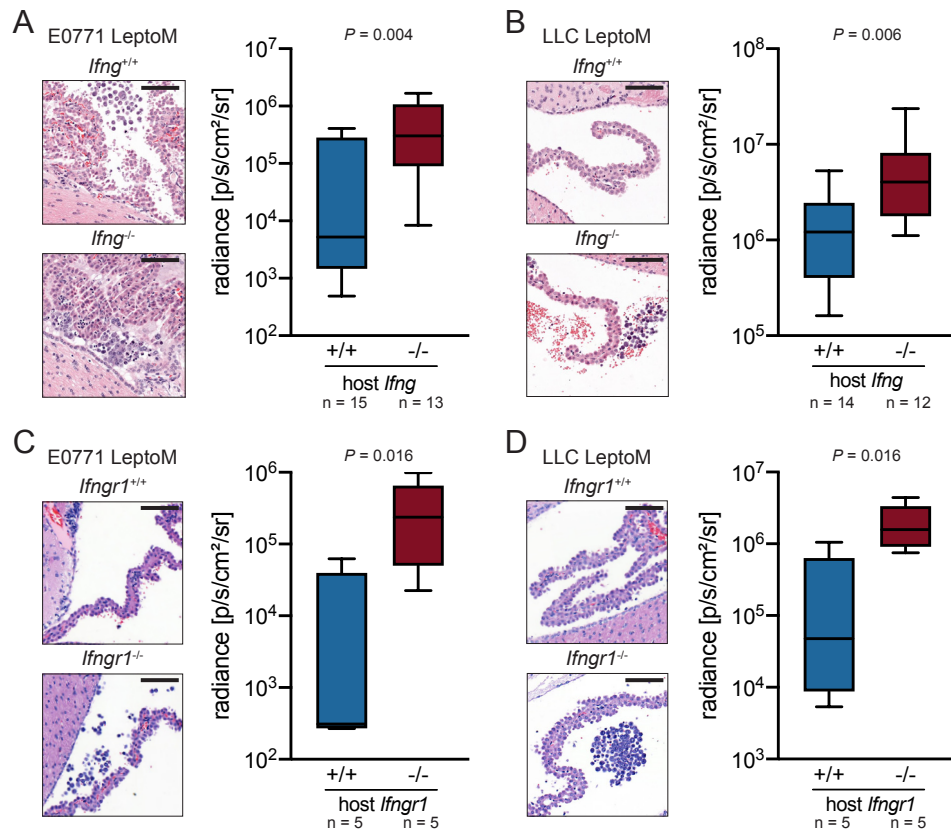

123 **Fig. S6. Leptomeningeal tumor growth in *Ifng*- and *Ifngr1*-deficient animals**

124

125 (A) Representative leptomeningeal tissue sections stained with H&E (scale bar = 100  $\mu$ m). Box  
126 plot illustrates *in vivo* radiance of E0771 LeptoM cells delivered intracisternally into C57BL/6  
127 *Ifng*-proficient and -deficient animals, quantified two weeks after injection.

128

129 (B) Representative leptomeningeal tissue sections stained with H&E (scale bar = 100  $\mu$ m). Box  
130 plot illustrates *in vivo* radiance of LLC LeptoM cells delivered intracisternally into C57BL/6 *Ifng*-  
131 proficient and -deficient animals, quantified two weeks after injection.

132

133 (C) Representative leptomeningeal tissue sections stained with H&E (scale bar = 100  $\mu$ m). Box  
134 plot illustrates *in vivo* radiance of E0771 LeptoM cells delivered intracisternally into C57BL/6  
135 *Ifngr1*-proficient and -deficient animals, quantified two weeks after injection.

136

137 (D) Representative leptomeningeal tissue sections stained with H&E (scale bar = 100  $\mu$ m). Box  
138 plot illustrates *in vivo* radiance of LLC LeptoM cells delivered intracisternally into C57BL/6  
139 *Ifngr1*-proficient and -deficient animals, quantified two weeks after injection.

140

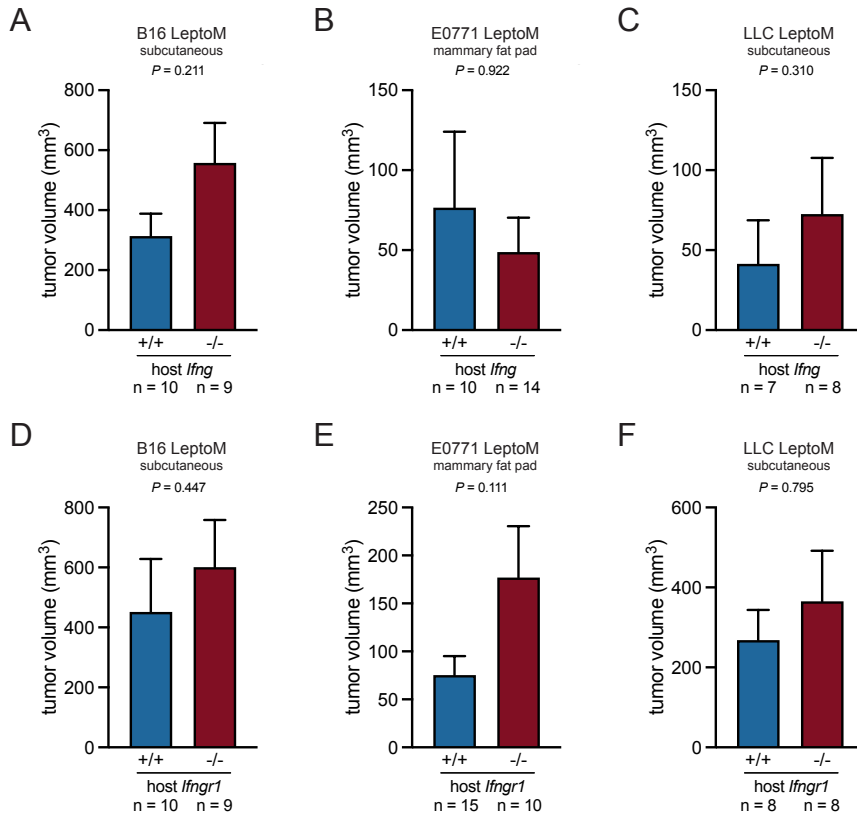

141 **Fig. S7. Extracranial tumor growth in *Ifng*- and *Ifngr1*-deficient animals**

142

143 (A) Volumes of intradermal B16 LeptoM flank tumors in C57BL/6 *Ifng*-proficient and -deficient  
144 animals, quantified two weeks after injection.

145

146 (B) Volumes of mammary fat pad E0771 LeptoM tumors in C57BL/6 *Ifng*-proficient and -  
147 deficient animals, quantified four weeks after injection.

148

149 (C) Volumes of subcutaneous LLC LeptoM flank tumors in C57BL/6 *Ifng*-proficient and -deficient  
150 animals, quantified three weeks after injection.

151

152 (D) Volumes of intradermal B16 LeptoM flank tumors in C57BL/6 *Ifngr1*-proficient and -deficient  
153 animals, quantified two weeks after injection.

154

155 (E) Volumes of mammary fat pad E0771 LeptoM tumors in C57BL/6 *Ifngr1*-proficient and -  
156 deficient animals, quantified four weeks after injection.

157

158 (F) Volumes of subcutaneous LLC LeptoM flank tumors in C57BL/6 *Ifngr1*-proficient and -  
159 deficient animals, quantified three weeks after injection.

160

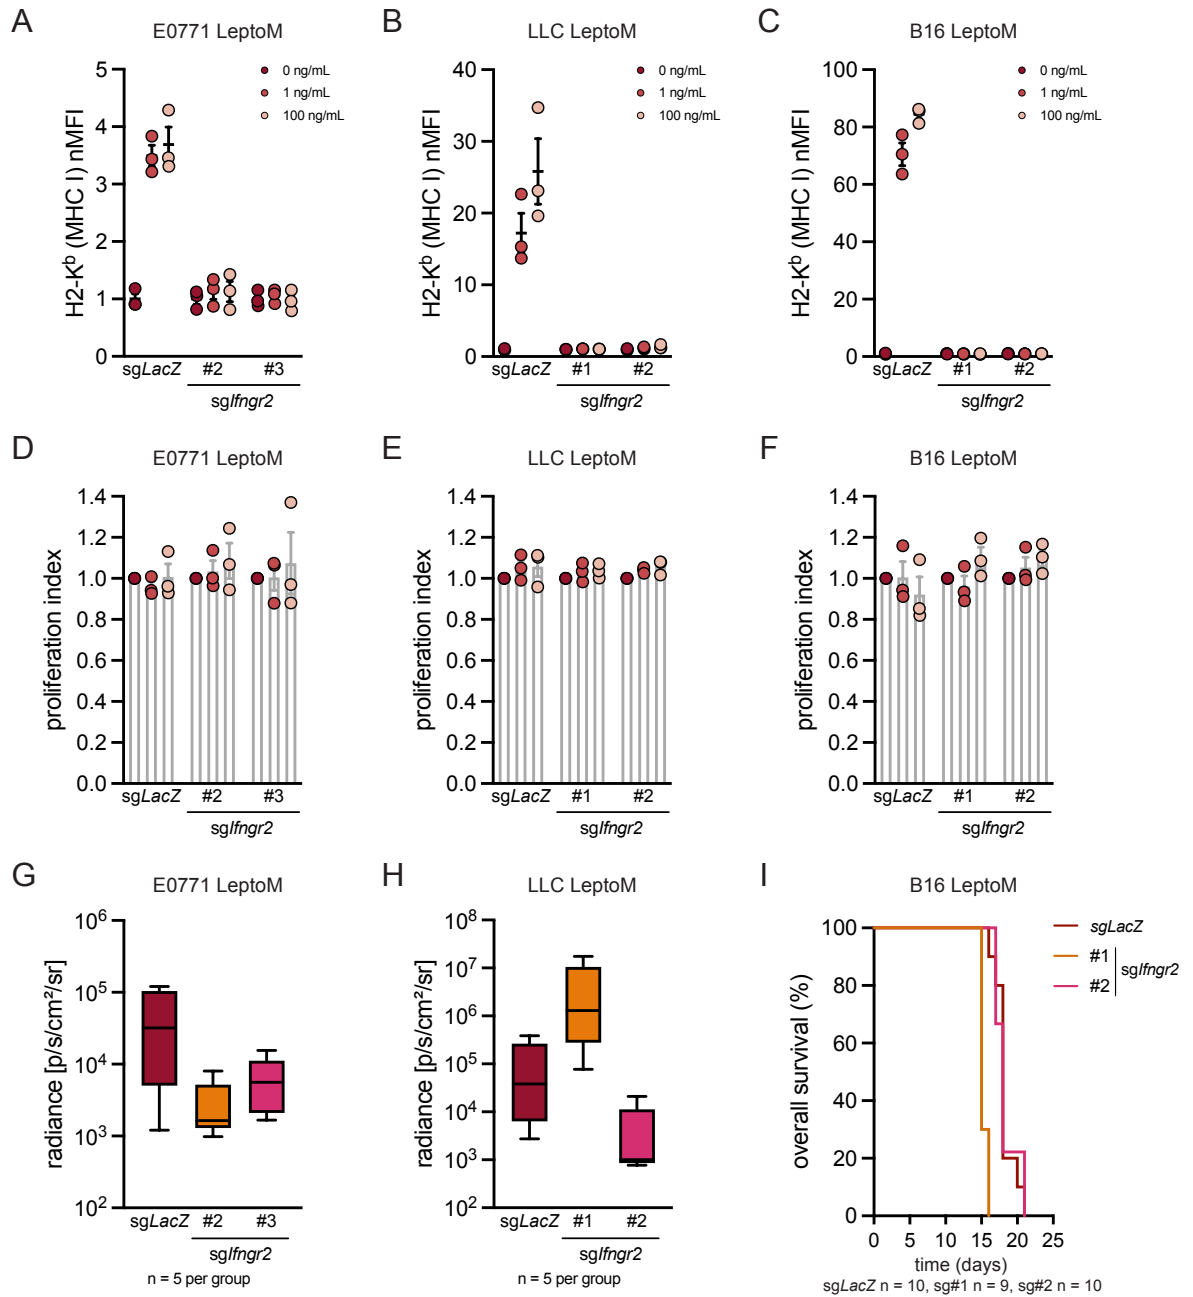

161 **Fig. S8. Cancer-intrinsic IFN- $\gamma$  signaling is dispensable for tumor growth in**  
162 **leptomeninges**

163

164 **(A)** *In vitro* induction of MHC class I in control (sg*LacZ*) and two *Ifngr2*-deficient E0771 LeptoM  
165 clones with recombinant IFN- $\gamma$ . Data pooled from three independent experiments.

166

167 **(B)** *In vitro* induction of MHC class I in control (sg*LacZ*) and two *Ifngr2*-deficient LLC LeptoM  
168 clones with recombinant IFN- $\gamma$ . Data pooled from three independent experiments.

169

170 **(C)** *In vitro* induction of MHC class I in control (sg*LacZ*) and two *Ifngr2*-deficient B16 LeptoM  
171 clones with recombinant IFN- $\gamma$ . Data pooled from three independent experiments.

172

173 **(D)** *In vitro* proliferation of control (sg*LacZ*) and two *Ifngr2*-deficient E0771 LeptoM clones  
174 exposed to recombinant IFN- $\gamma$ . Data pooled from three independent experiments.

175

176 **(E)** *In vitro* proliferation of control (sg*LacZ*) and two *Ifngr2*-deficient LLC LeptoM clones exposed  
177 to recombinant IFN- $\gamma$ . Data pooled from three independent experiments.

178

179 **(F)** *In vitro* proliferation of control (sg*LacZ*) and two *Ifngr2*-deficient B16 LeptoM clones exposed  
180 to recombinant IFN- $\gamma$ . Data pooled from three independent experiments.

181

182 **(G)** *In vivo* radiance of control (sg*LacZ*) and two *Ifngr2*-deficient E0771 LeptoM clones delivered  
183 intracisternally into C57Bl/6-*Tyr<sup>c-2</sup>* animals, quantified three weeks after injection in one *in vivo*  
184 experiment.

185

186 **(H)** *In vivo* radiance of control (sg*LacZ*) and two *Ifngr2*-deficient LLC LeptoM clones delivered  
187 intracisternally into C57Bl/6-*Tyr<sup>c-2</sup>* animals, quantified two weeks after injection in one *in vivo*  
188 experiment.

189

190 **(I)** Kaplan-Meier plot illustrating overall survival of control (sg*LacZ*) and two *Ifngr2*-deficient B16  
191 LeptoM clones delivered intracisternally into C57Bl/6 mice in one *in vivo* experiment.

192



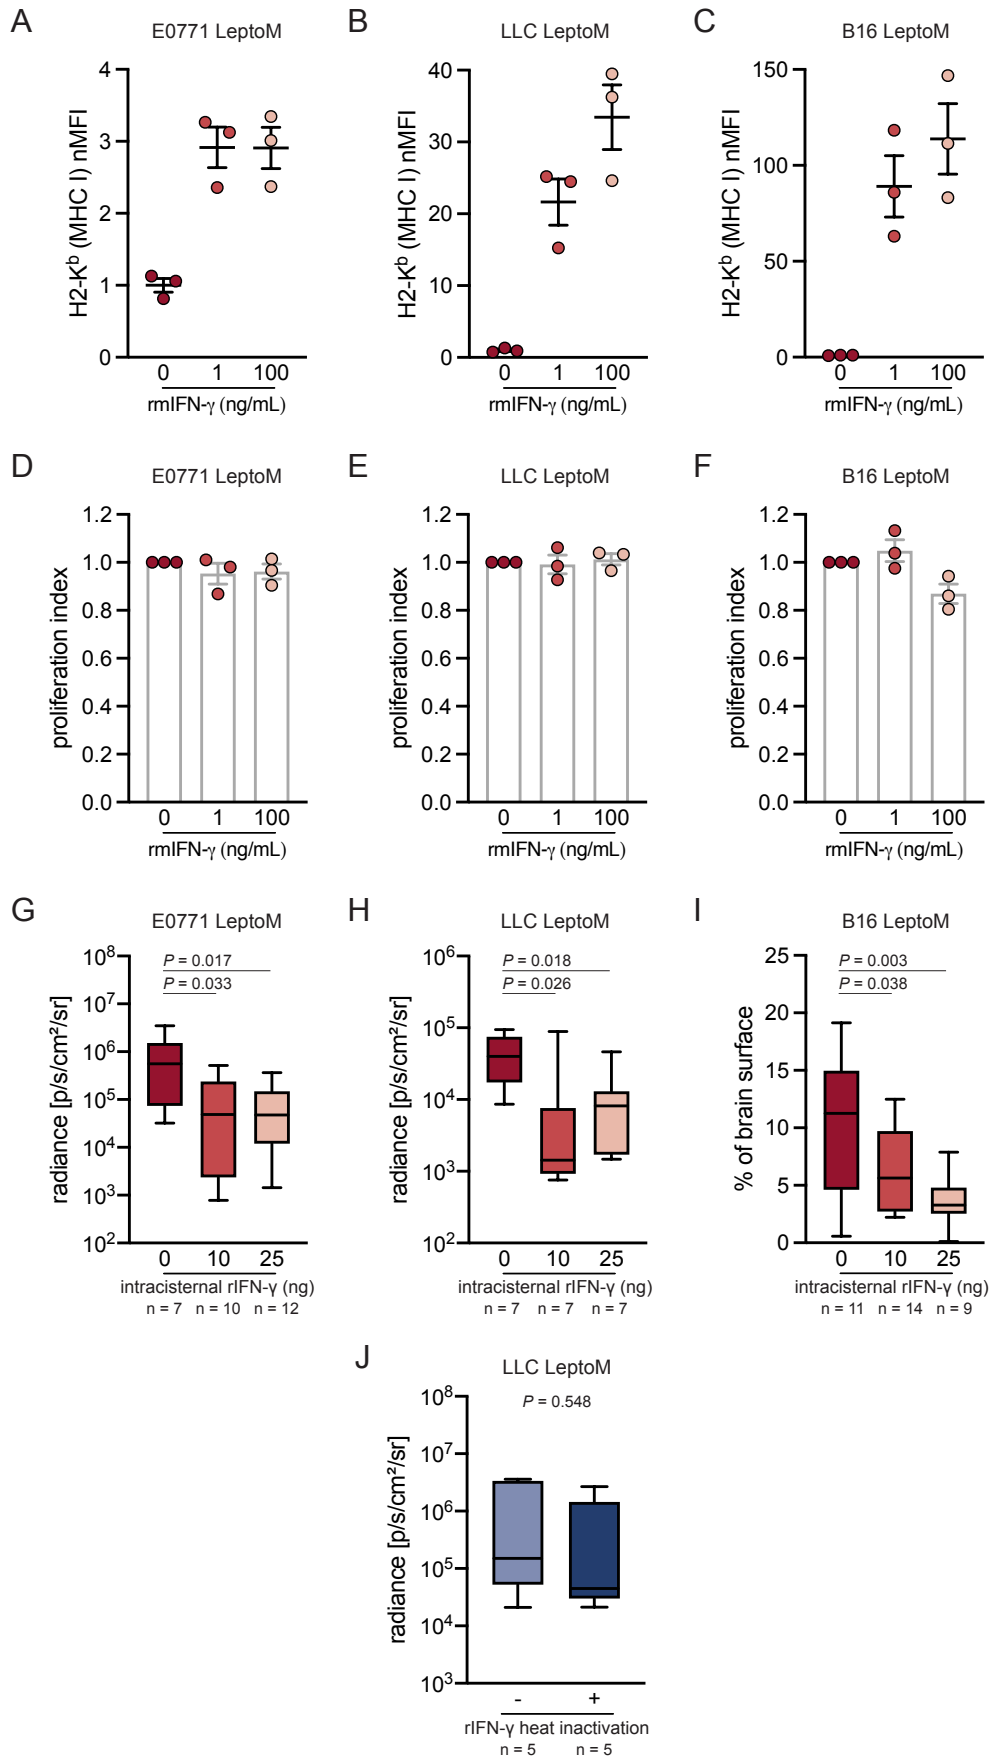

193 **Fig. S9. Leptomeningeal IFN- $\gamma$ -mediated tumor growth suppression is driven by the**  
194 **microenvironment.**

195

196 **(A)** *In vitro* induction of MHC class I in E0771 LeptoM cells with recombinant IFN- $\gamma$ . Data pooled  
197 from three independent experiments.

198

199 **(B)** *In vitro* induction of MHC class I in LLC LeptoM cells with recombinant IFN- $\gamma$ . Data pooled  
200 from three independent experiments.

201

202 **(C)** *In vitro* induction of MHC class I in B16 LeptoM cells with recombinant IFN- $\gamma$ . Data pooled  
203 from three independent experiments.

204

205 **(D)** *In vitro* proliferation of E0771 LeptoM cells exposed to recombinant IFN- $\gamma$ . Data pooled from  
206 three independent experiments.

207

208 **(E)** *In vitro* proliferation of LLC LeptoM cells exposed to recombinant IFN- $\gamma$ . Data pooled from  
209 three independent experiments.

210

211 **(F)** *In vitro* proliferation of B16 LeptoM cells exposed to recombinant IFN- $\gamma$ . Data pooled from  
212 three independent experiments.

213

214 **(G)** *In vivo* tumor growth of E0771 LeptoM cells in C57Bl/6-*Tyr<sup>c-2</sup>* animals injected weekly with  
215 vehicle or two doses of recombinant IFN- $\gamma$ , as a function of radiance.

216

217 **(H)** *In vivo* tumor growth of LLC LeptoM cells in C57Bl/6-*Tyr<sup>c-2</sup>* animals injected weekly with  
218 vehicle or two doses of recombinant IFN- $\gamma$ , as a function of radiance.

219

220 **(I)** *In vivo* tumor growth of B16 LeptoM cells in C57Bl/6 animals injected weekly with vehicle or  
221 two doses of recombinant IFN- $\gamma$ , as a function of radiance.

222

223 **(J)** *In vivo* tumor growth of LLC LeptoM cells in C57Bl/6-*Tyr<sup>c-2</sup>* animals injected weekly with  
224 heat-inactivated vehicle (PBS) or heat-inactivated recombinant IFN- $\gamma$ , as a function of radiance

225 in one *in vivo* experiment.

226

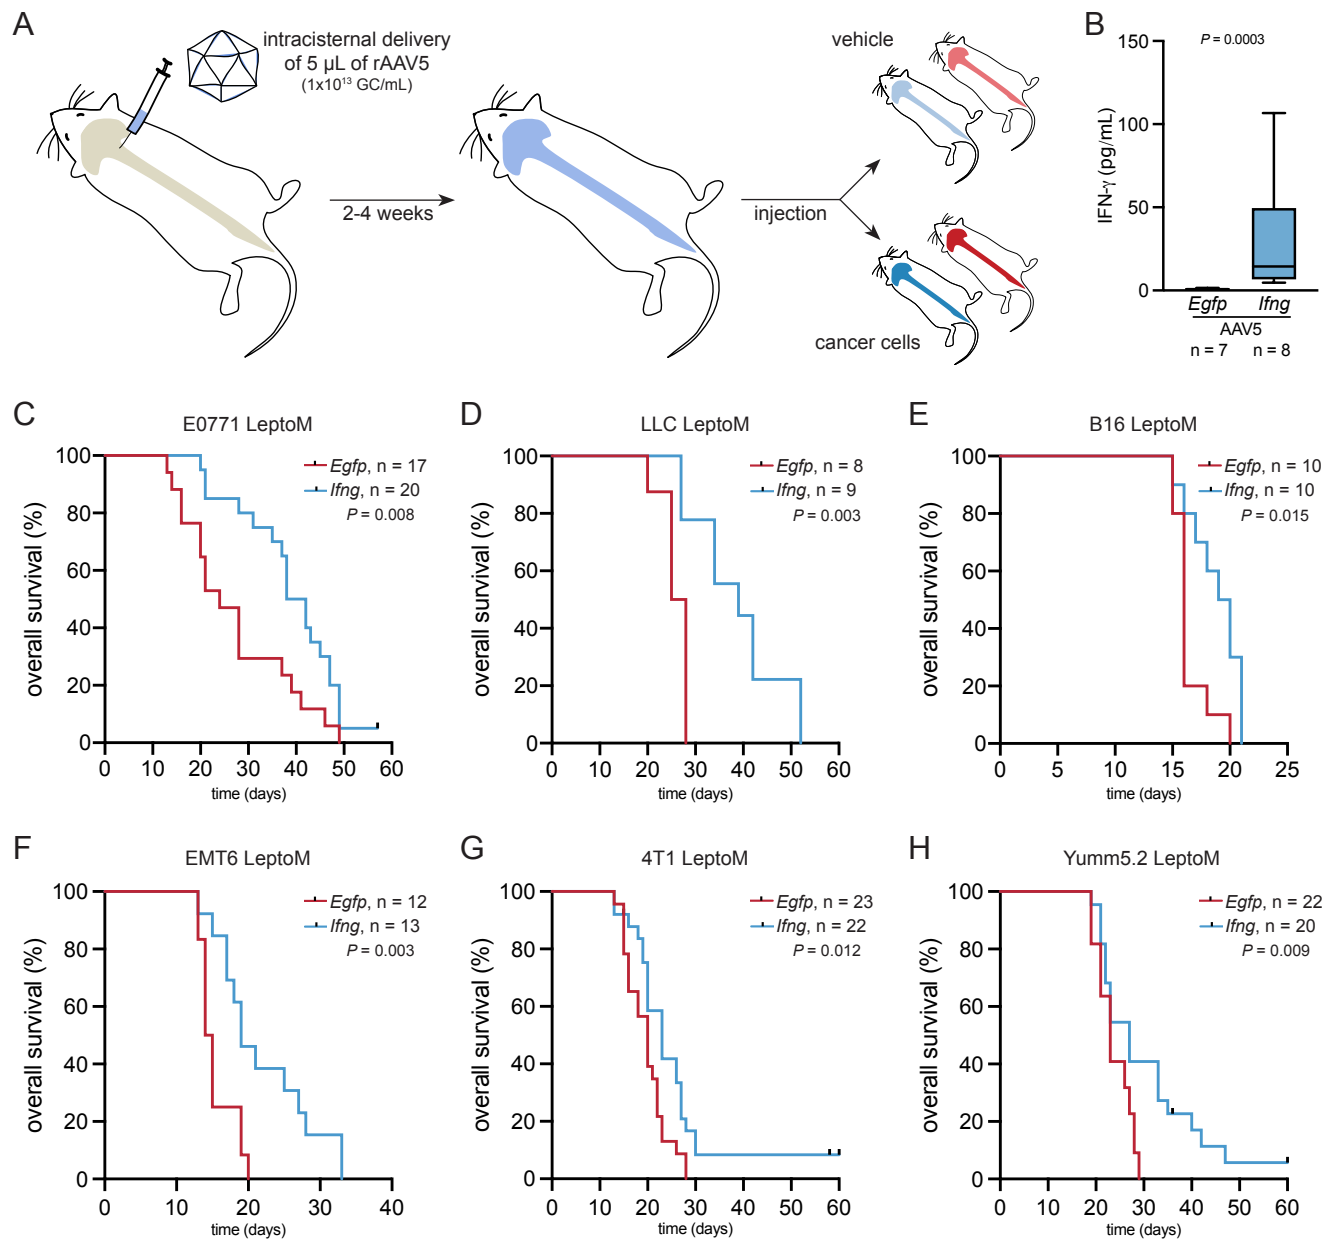

227 **Fig. S10. Leptomeninges-specific overexpression of IFN- $\gamma$  extends survival of LeptoM**  
228 **cells-bearing animals.**

229

230 (A) Schematic showing experimental strategy of leptomeningeal *Egfp* or *Ifng* overexpression,  
231 used for functional experiments in this study.

232

233 (B) Levels of IFN- $\gamma$  in the CSF collected from naïve C57Bl/6 and BALB/c animals  
234 overexpressing *Egfp* or *Ifng* in the leptomeninges, detected by cytometric bead array.

235

236 (C) Kaplan-Meier plot showing survival of E0771 LeptoM-bearing C57Bl/6-*Tyr<sup>c-2</sup>* animals  
237 overexpressing *Egfp* or *Ifng* in the leptomeninges (logrank test).

238

239 (D) Kaplan-Meier plot showing survival of LLC LeptoM-bearing C57Bl/6-*Tyr<sup>c-2</sup>* animals  
240 overexpressing *Egfp* or *Ifng* in the leptomeninges (logrank test).

241

242 (E) Kaplan-Meier plot showing survival of B16 LeptoM-bearing C57Bl/6 animals overexpressing  
243 *Egfp* or *Ifng* in the leptomeninges (logrank test).

244

245 (F) Kaplan-Meier plot showing survival of EMT6 LeptoM-bearing BALB/c animals  
246 overexpressing *Egfp* or *Ifng* in the leptomeninges (logrank test).

247

248 (G) Kaplan-Meier plot showing survival of 4T1 LeptoM-bearing BALB/c animals overexpressing  
249 *Egfp* or *Ifng* in the leptomeninges (logrank test).

250

251 (H) Kaplan-Meier plot showing survival of Yumm5.2 LeptoM-bearing C57Bl/6 and C57Bl/6-*Tyr<sup>c-2</sup>*  
252 animals overexpressing *Egfp* or *Ifng* in the leptomeninges (logrank test).

253

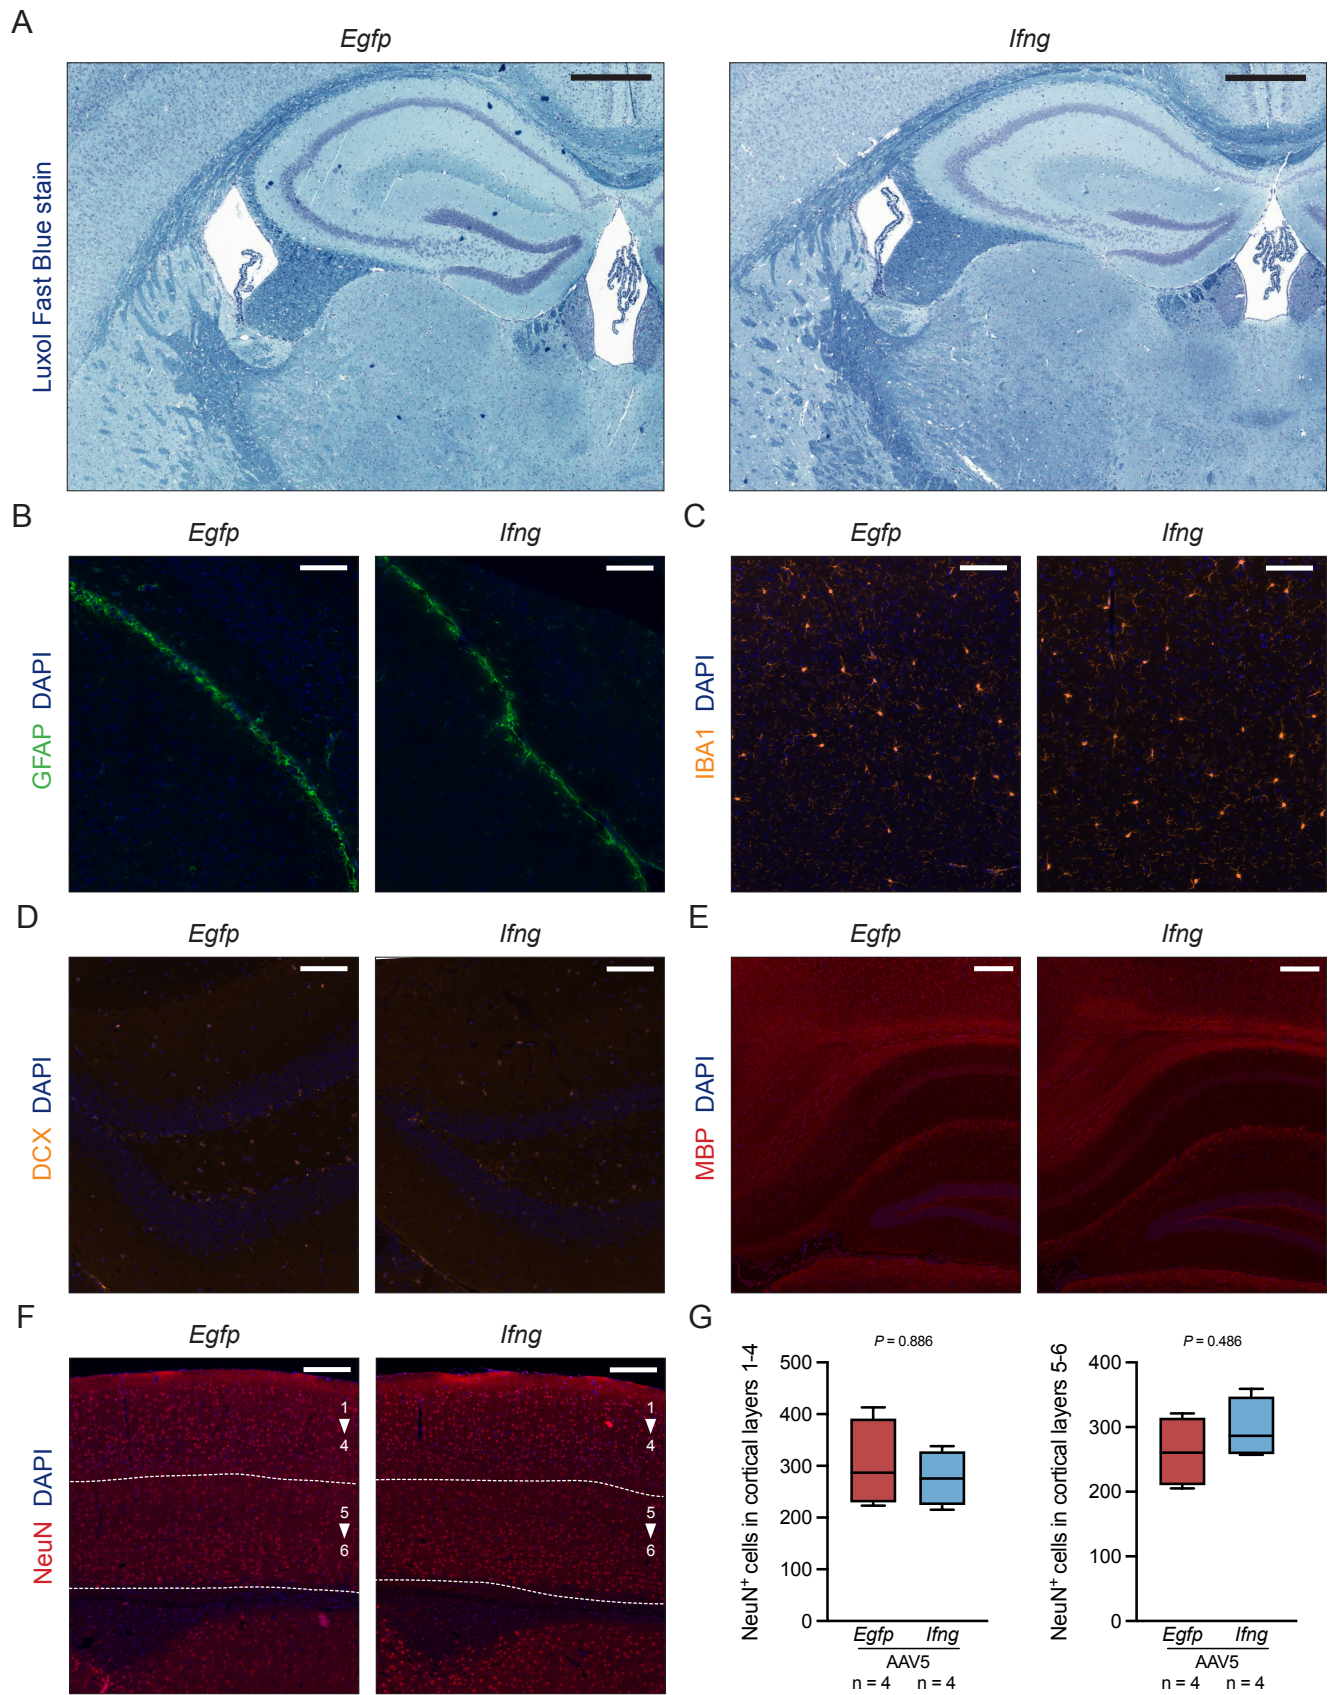

254 **Fig. S11. Leptomeningeal IFN- $\gamma$  does not affect morphology of brain parenchyma.**

255

256 (A) Representative images of brain tissue sections from naïve C57Bl/6 animals overexpressing  
257 *Egfp* or *Ifng* stained with Luxol Fast Blue (n = 4 *per* group, 3 months after AAV introduction,  
258 scale bar = 500  $\mu$ m).

259

260 (B) Representative images of brain tissue sections from naïve C57Bl/6 animals overexpressing  
261 *Egfp* or *Ifng* stained for astrocyte activation marker GFAP (n = 4 *per* group, 3 months after AAV  
262 introduction, scale bar = 100  $\mu$ m).

263

264 (C) Representative images of brain tissue sections from naïve C57Bl/6 animals overexpressing  
265 *Egfp* or *Ifng* stained for microglia marker Iba1 (n = 4 *per* group, 3 months after AAV introduction,  
266 scale bar = 100  $\mu$ m).

267

268 (D) Representative images of brain tissue sections from naïve C57Bl/6 animals overexpressing  
269 *Egfp* or *Ifng* stained for neural progenitor marker DCX (n = 4 *per* group, 3 months after AAV  
270 introduction, scale bar = 100  $\mu$ m).

271

272 (E) Representative images of brain tissue sections from naïve C57Bl/6 animals overexpressing  
273 *Egfp* or *Ifng* stained for myelination marker MBP (n = 4 *per* group, 3 months after AAV  
274 introduction, scale bar = 200  $\mu$ m).

275

276 (F) Representative images of brain tissue sections from naïve C57Bl/6 animals overexpressing  
277 *Egfp* or *Ifng* stained for marker of mature neurons NeuN (n = 4 *per* group, 3 months after AAV  
278 introduction, scale bar = 200  $\mu$ m).

279

280 (G) Quantification of NeuN<sup>+</sup> mature neurons *per* FOV in cortical layers 1-4 (left) and 5-6 (right).  
281 See outline in panel F.

282



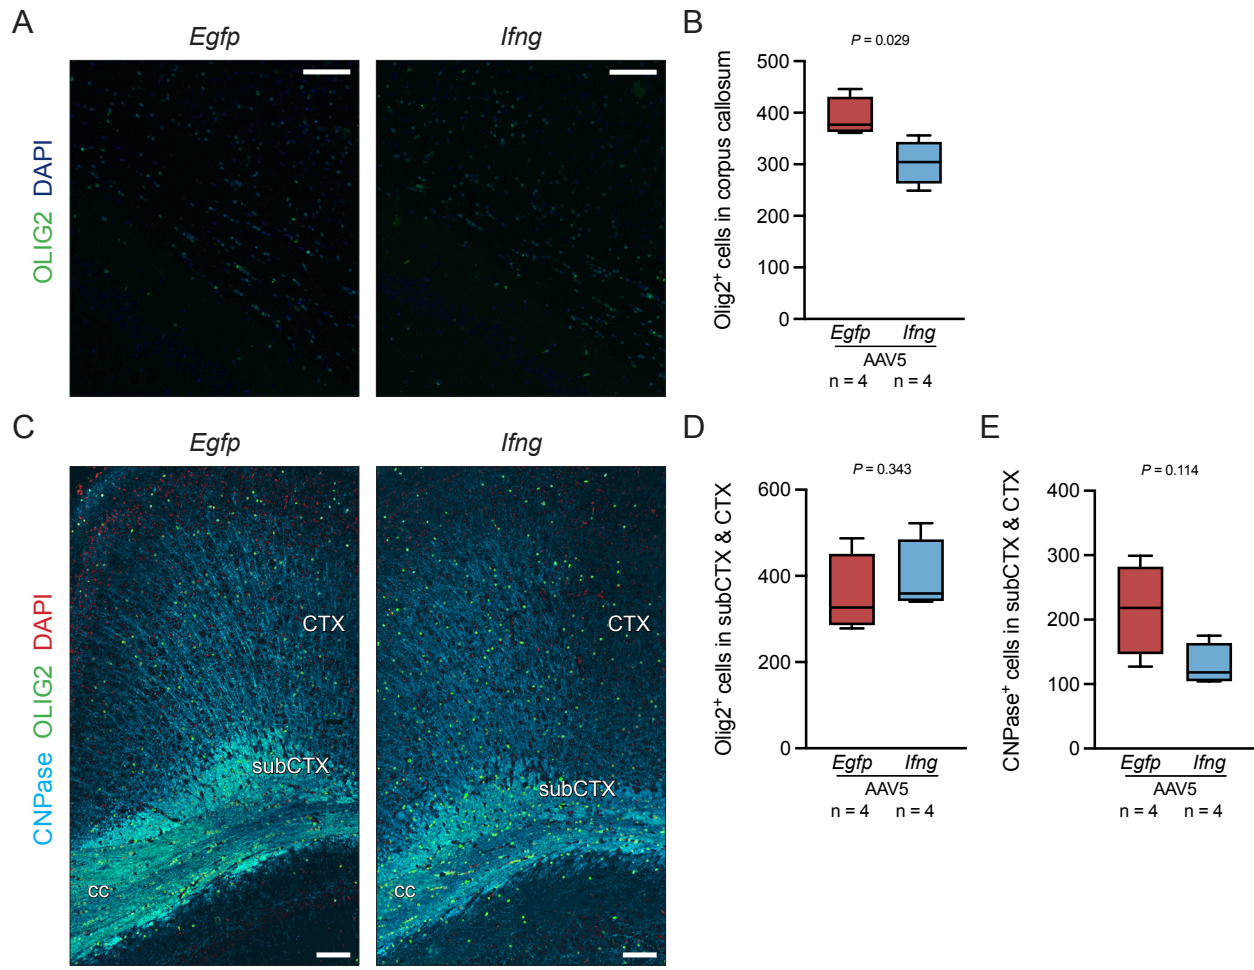

283 **Fig. S12. Leptomeningeal IFN- $\gamma$  reduces oligodendrocyte numbers in *corpus callosum*.**

284

285 **(A)** Representative images of *corpus callosum* sections from naïve C57Bl/6 animals  
286 overexpressing *Egfp* or *Ifng* stained for marker of oligodendrocytes Olig2 (n = 4 *per* group, 3  
287 months after AAV introduction, scale bar = 100  $\mu$ m).

288

289 **(B)** Quantification of Olig2<sup>+</sup> oligodendrocytes *per* FOV in *corpus callosum*.

290

291 **(C)** Representative images of brain tissue sections from naïve C57Bl/6 animals overexpressing  
292 *Egfp* or *Ifng* stained for markers of oligodendrocytes Olig2 and CNPase (n = 4 *per* group, 3  
293 months after AAV introduction, scale bar = 100  $\mu$ m).

294

295 **(D)** Quantification of Olig2<sup>+</sup> oligodendrocytes *per* FOV in cortical and subcortical regions.  
296 Corresponding regions are marked in panel C.

297

298 **(E)** Quantification of CNPase<sup>+</sup> oligodendrocytes *per* FOV in cortical and subcortical regions.  
299 Corresponding regions are marked in panel C.

300



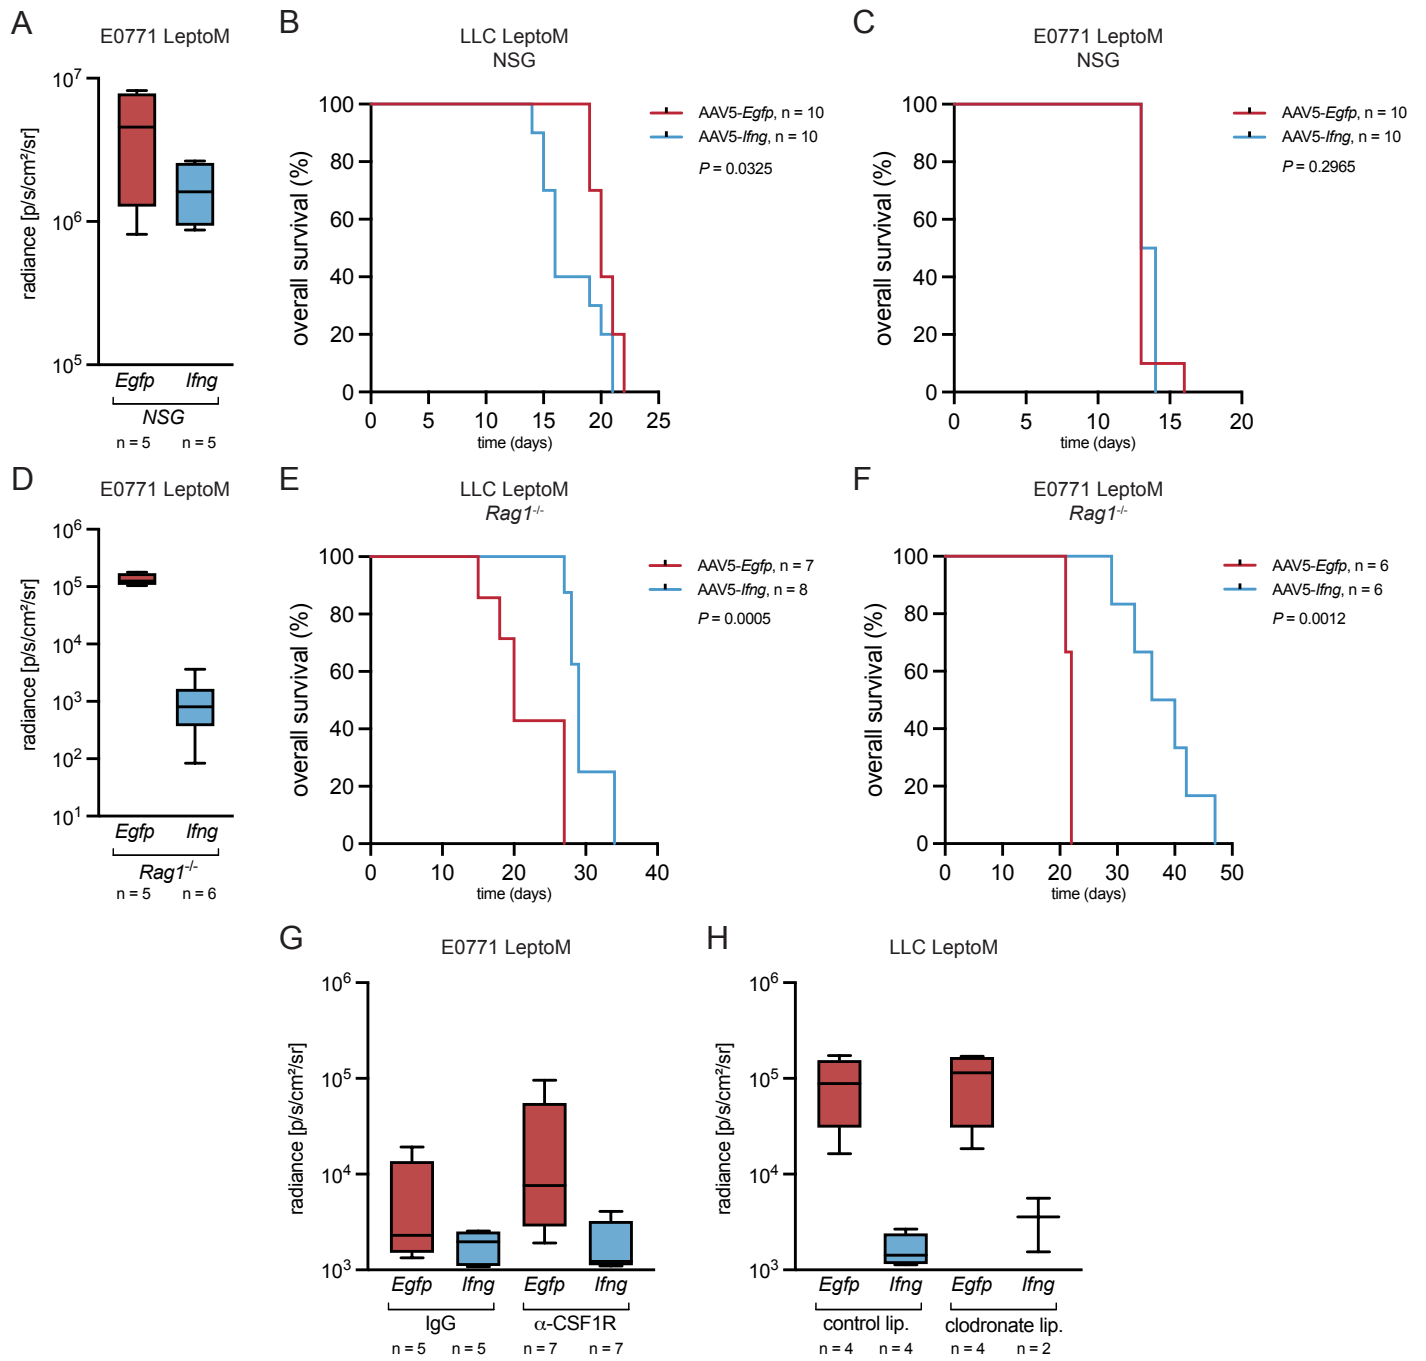

301 **Fig. S13. Leptomeningeal IFN- $\gamma$  does not require adaptive immune system to suppress**  
302 **metastatic outgrowth.**

303

304 (A) *In vivo* radiance of E0771 LeptoM cells delivered intracisternally into NSG animals  
305 overexpressing *Egfp* or *Ifng* in the leptomeninges, quantified two weeks after injection. (NSG -  
306 non-obese, diabetic, severe combined immunodeficient, *Il2rg*<sup>null</sup>).

307

308 (B) Kaplan-Meier plot showing survival of LLC LeptoM-bearing NSG animals overexpressing  
309 *Egfp* or *Ifng* in the leptomeninges (logrank test).

310

311 (C) Kaplan-Meier plot showing survival of E0771 LeptoM-bearing NSG animals overexpressing  
312 *Egfp* or *Ifng* in the leptomeninges (logrank test).

313

314 (D) *In vivo* radiance of E0771 LeptoM cells delivered intracisternally into Rag1-deficient animals  
315 overexpressing *Egfp* or *Ifng* in the leptomeninges, quantified two weeks after injection. (NSG -  
316 non-obese, diabetic, severe combined immunodeficient, *Il2rg*<sup>null</sup>).

317

318 (E) Kaplan-Meier plot showing survival of LLC LeptoM-bearing Rag1-deficient animals  
319 overexpressing *Egfp* or *Ifng* in the leptomeninges (logrank test).

320

321 (F) Kaplan-Meier plot showing survival of E0771 LeptoM-bearing Rag1-deficient animals  
322 overexpressing *Egfp* or *Ifng* in the leptomeninges (logrank test).

323

324 (G) *In vivo* radiance of E0771 LeptoM cells delivered intracisternally into C57Bl6-*Tyr*<sup>c-2</sup> animals  
325 overexpressing *Egfp* or *Ifng* in the leptomeninges and tri-weekly infused with non-targeting  
326 isotype control antibody or CSF1R-targeting antibody, quantified two weeks after injection.

327

328 (H) *In vivo* radiance of LLC LeptoM cells delivered intracisternally into C57Bl6-*Tyr*<sup>c-2</sup> animals  
329 overexpressing *Egfp* or *Ifng* in the leptomeninges and bi-weekly infused with control or  
330 clodronate liposomes, quantified two weeks after injection.

331

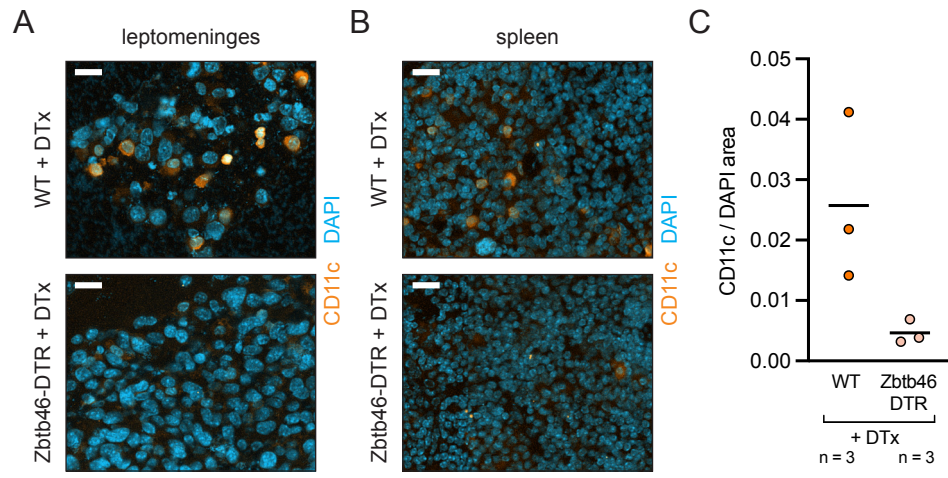

332 **Fig. S14. Depletion of leptomeningeal cDCs in bone marrow chimeras.**

333

334 **(A)** Representative images of dendritic cell marker CD11c in leptomeningeal cancer plaques in  
335 wild-type (WT) and Zbtb46-DTR bone marrow chimeras, treated with diphtheria toxin (DTx). Mice  
336 were injected with LLC LeptoM cells (scale bar = 20  $\mu$ m).

337

338 **(B)** Representative images of dendritic cell marker CD11c in spleen of wild-type (WT) and  
339 Zbtb46-DTR bone marrow chimeras, treated with diphtheria toxin (DTx). Mice were injected with  
340 LLC LeptoM cells (scale bar = 20  $\mu$ m).

341

342 **(C)** Quantification of systemic cDC depletion in images from panel B.

343

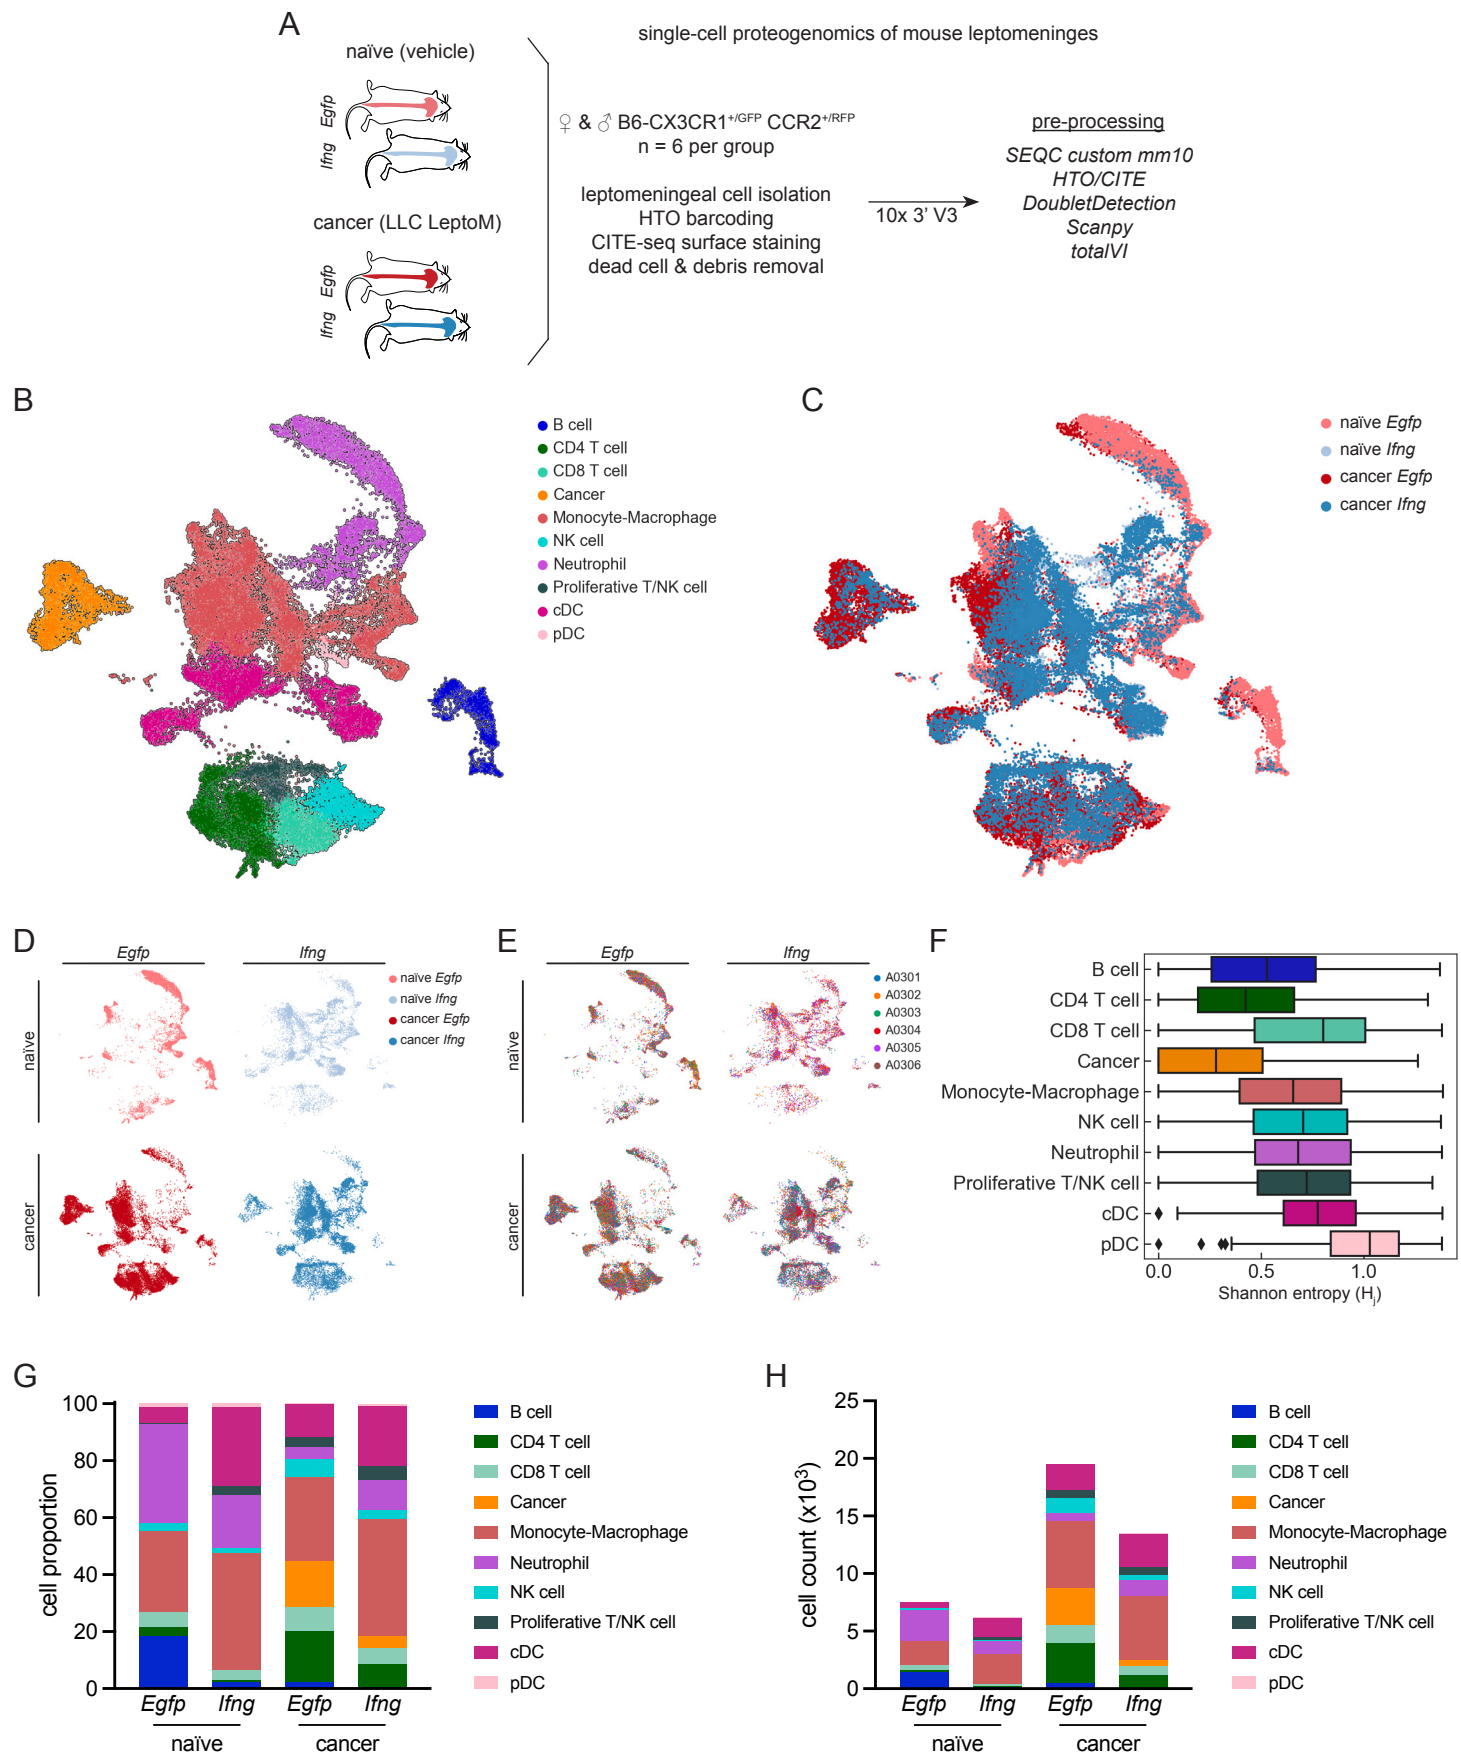

344 **Fig. S15. Mouse single-cell proteogenomics of naïve and metastasis-bearing, *Ifng*-**  
345 **overexpressing mice.**

346

347 **(A)** Experimental overview of single-cell proteogenomic analysis of mouse leptomeninges.

348

349 **(B)** UMAP of mouse leptomeningeal cells colored by major cell type (n = 24).

350

351 **(C)** UMAP of mouse leptomeningeal cells colored by condition (n = 6 mice *per* group).

352

353 **(D)** Individual UMAPs of mouse leptomeningeal cells *per* condition.

354

355 **(E)** Individual UMAPs showing representation of six barcodes *per* condition.

356

357 **(F)** Inter-sample heterogeneity measured with Shannon entropy. For each cell, the Shannon  
358 entropy measures the sample diversity of its nearest neighbors in the kNN graph.

359

360 **(G)** Proportion of major cell types per condition.

361

362 **(H)** Counts of major cell types per condition.

363

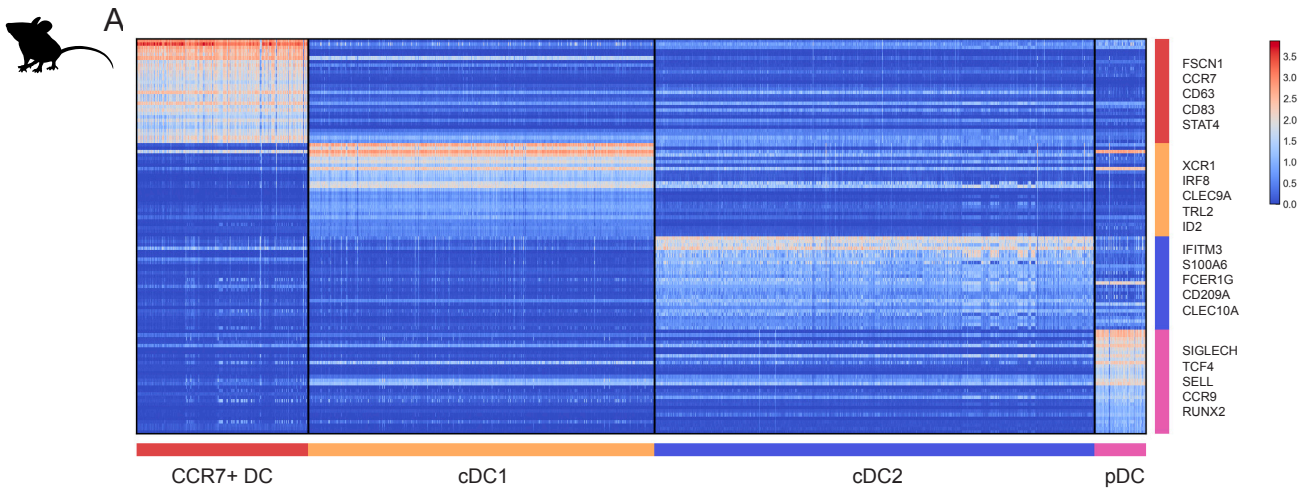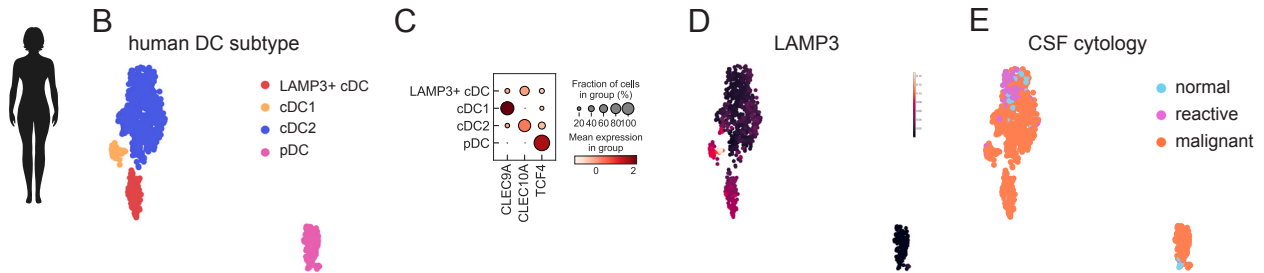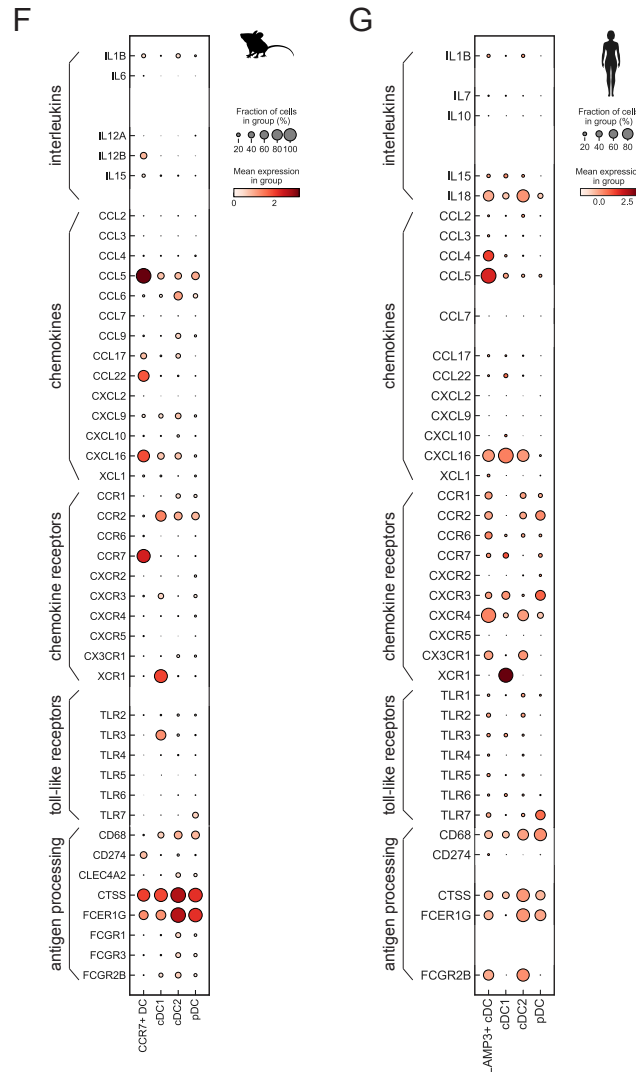

364 **Fig. S16. Characterization of leptomeningeal dendritic cells.**

365

366 (A) Heatmap showing scaled expression of top 30 genes *per* mouse DC cell type (one cell type  
367 vs. the rest; FC > 2).

368

369 (B) UMAP projection of DC subtypes detected in human CSF (n = 883 cells); cDC and pDC  
370 clusters from Fig. 1B were subsetted and replotted. cDC1 cells are *CLEC9A<sup>+</sup>XCR1<sup>+</sup>*, cDC2 cells  
371 are *CLEC10A<sup>+</sup>CD1C<sup>+</sup>*, pDC cells are *IRF7<sup>+</sup>TCF4<sup>+</sup>*. Human LAMP3<sup>+</sup> migratory dendritic cells are  
372 *LAMP3<sup>+</sup>CCR7<sup>+</sup>* (orthologous to mouse CCR7<sup>+</sup> DC).

373

374 (C) Marker gene expression of human CSF DCs.

375

376 (D) MAGIC-imputed expression of *LAMP3* in human CSF dendritic cells.

377

378 (E) CSF cytology classification of human DC types.

379

380 (F) Dot plot showing gene expression of interleukins, chemokines, chemokine receptors, toll-like  
381 receptors, and genes associated with antigen presentation in mouse DC cells, as detected with  
382 CITE-seq. Normalized counts were used for computation. Genes not detected with 10x and  
383 genes that did not pass filtering steps defined in the Methods were not plotted.

384

385 (G) Dot plot showing gene expression of interleukins, chemokines, chemokine receptors, toll-  
386 like receptors, and genes associated with antigen presentation in human DC cells, as detected  
387 with scRNA-seq. Normalized counts were used for computation. Genes not detected with 10x  
388 and genes that did not pass filtering steps defined in the Methods were not plotted.

389



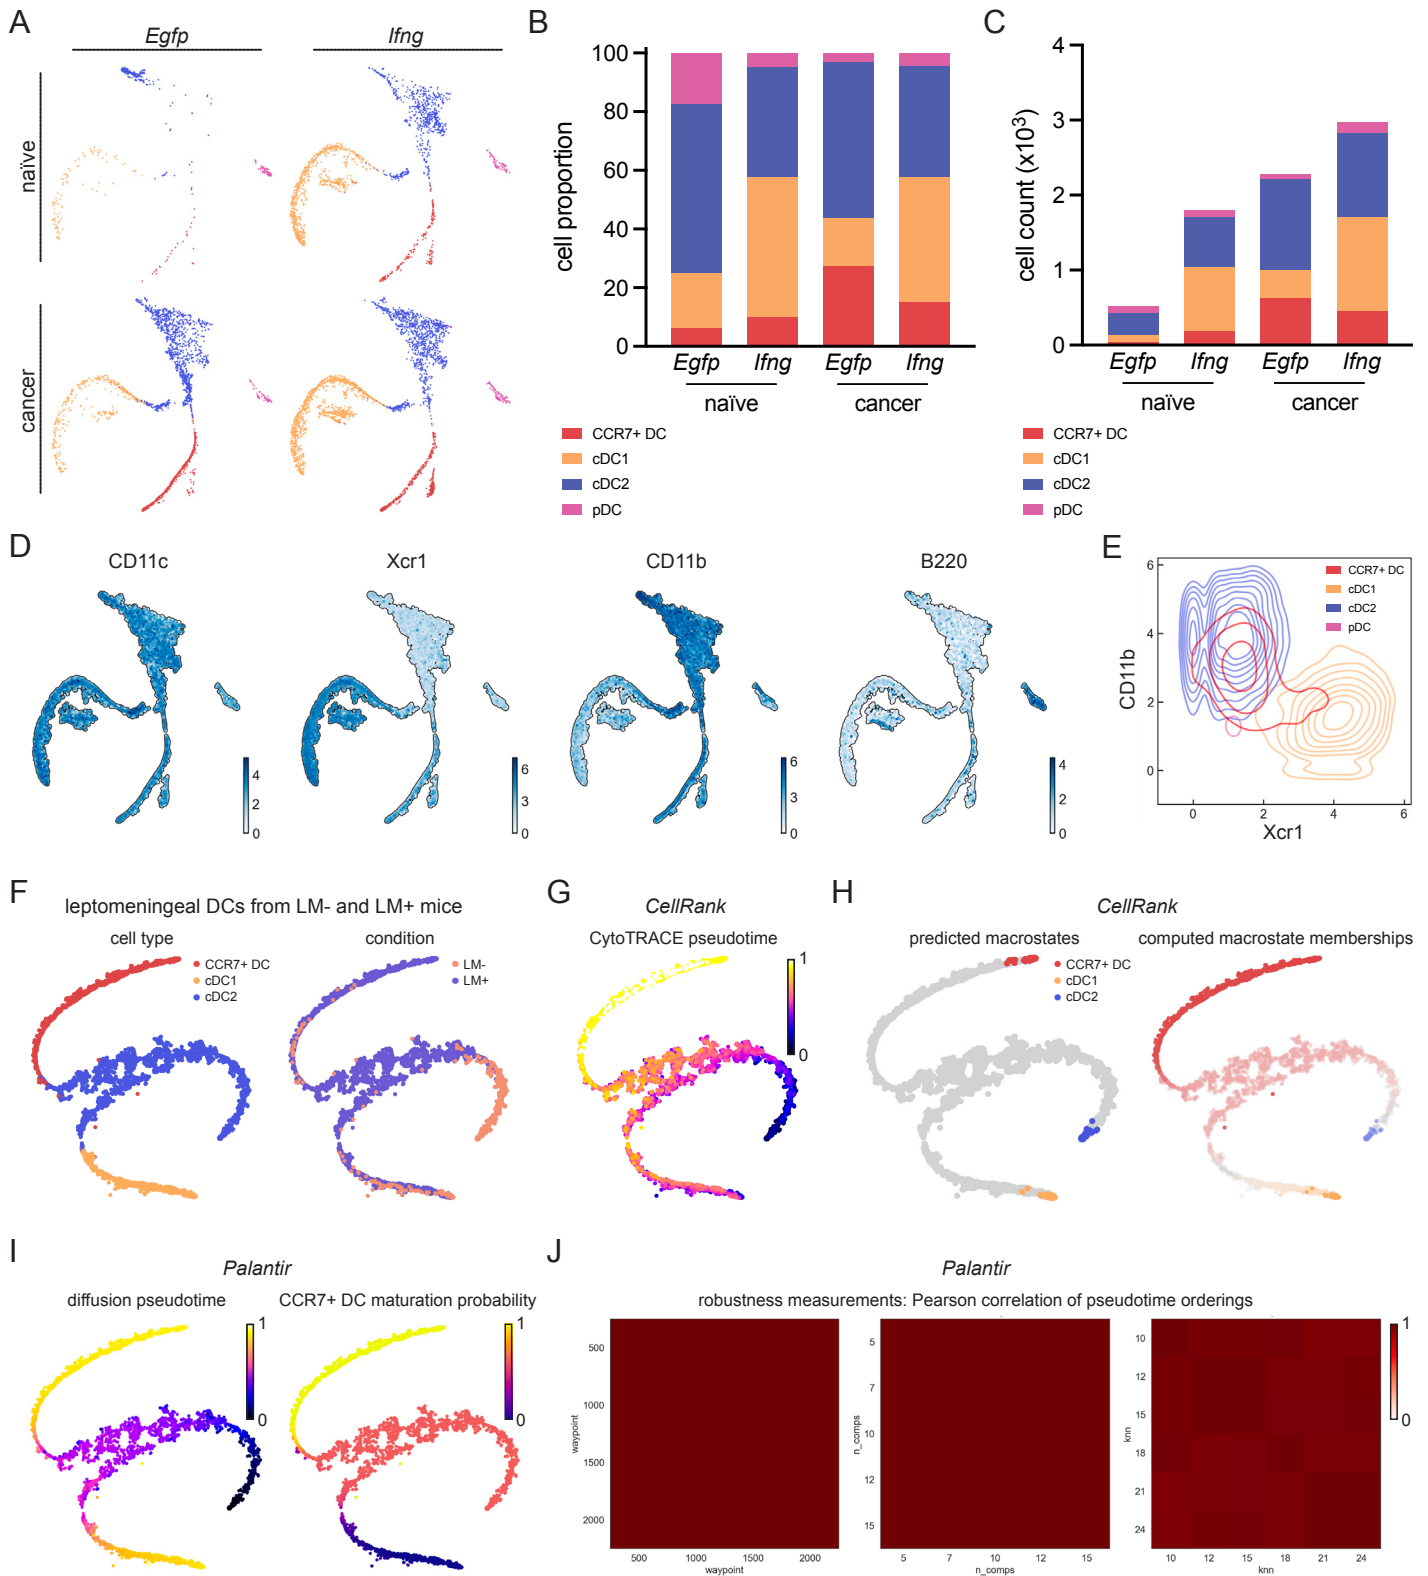

390 **Fig. S17. Trajectory analysis of leptomeningeal dendritic cells.**

391

392 (A) tSNE maps showing abundance of captured dendritic cell types in naïve and metastasis-  
393 bearing, *Egfp*- or *Irfng*-overexpressing mice (total of n = 7,566 cells pooled from 4 conditions and  
394 n = 6 animals *per* group).

395

396 (B) Proportion of dendritic cell subtypes per condition.

397

398 (C) Counts of dendritic cell subtypes per condition.

399

400 (D) tSNE projection of dendritic cell surface markers detected with CITE-seq. CD11c - pan-DC  
401 marker; Xcr1 - cDC1 marker; CD11b - cDC2 marker; B220 - pDC marker.

402

403 (E) Bivariate plot showing distribution of cell surface Xcr1 and CD11b in leptomeningeal  
404 dendritic cell subsets, as detected with CITE-seq.

405

406 (F) tSNE projection of 2,575 mouse leptomeningeal DCs subsetted for trajectory analysis. Cells  
407 are from *Egfp*-overexpressing, naïve and cancer-bearing mice, and the plots are colored based  
408 on cell type and condition. See Methods for further details.

409

410 (G) tSNE projection of CytoTRACE pseudotime, as determined with CellRank, suggesting that  
411 CCR7+ DCs are the terminal state within the subsetted cell population.

412

413 (H) Terminal DC macrostates and computed macrostate membership for each cell, as predicted  
414 with CellRank and projected onto a tSNE. While cDC1 cells are restricted to cDC1 membership,  
415 cells from cDC2 cluster are gradually acquiring CCR7+ DC membership.

416 (I) Palantir-computed diffusion pseudotime and CCR7+ DC maturation (branch) probability.  
417 Gene trends along this pseudotime axis are plotted in Fig. 4D.

418

419 (J) Plots show Pearson correlation of pseudotime orderings in Palantir analysis for different  
420 parameters (waypoint samplings, number of principal components, and number of K-nearest  
421 neighbours) and all cells. DC trajectory analysis, performed as described in Methods, is not  
422 sensitive to fluctuations in these parameters.

423

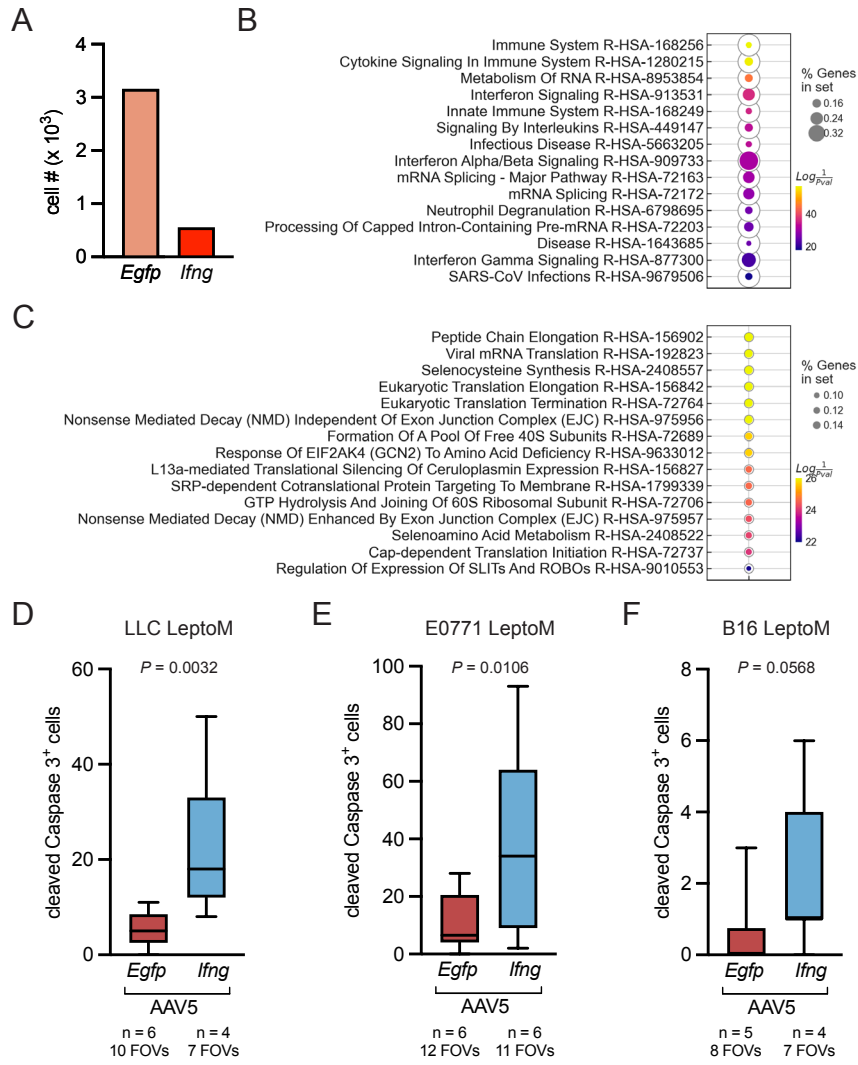

424 **Fig. S18. Characterization of leptomeningeal metastatic cells in *Egfp*- and *Ifng*-**  
425 **overexpressing mice.**

426

427 **(A)** Quantification of cancer cells captured in the mouse single-cell atlas (n = 3,718 keratin<sup>+</sup>  
428 CD63<sup>+</sup> cells isolated from n = 6 mice *per* group); related to Figure 4E, F.

429

430 **(B)** GSEAPy analysis of top 15 Reactome 2022 pathways enriched in cancer cells shown in Fig.  
431 5 isolated from *Ifng*-overexpressing animals and subsetted as described in Fig. 4E (DEG cut-off  
432  $P < 0.01$ ).

433

434 **(C)** GSEAPy analysis of top 15 Reactome 2022 pathways enriched in cancer cells isolated from  
435 *Egfp*-overexpressing animals and subsetted as described in Fig. 4E (DEG cut-off  $P < 0.01$ ).

436

437 **(D)** Quantification of cleaved Caspase 3-positive cells in cancer plaques and clusters, in the  
438 leptomeninges of *Egfp*- or *Ifng*-overexpressing animals injected with LLC LeptoM cells.

439

440 **(E)** Quantification of cleaved Caspase 3-positive cells in cancer plaques and clusters, in the  
441 leptomeninges of *Egfp*- or *Ifng*-overexpressing animals injected with E0771 LeptoM cells.

442

443 **(F)** Quantification of cleaved Caspase 3-positive cells in cancer plaques and clusters, in the  
444 leptomeninges of *Egfp*- or *Ifng*-overexpressing animals injected with B16 LeptoM cells.

445

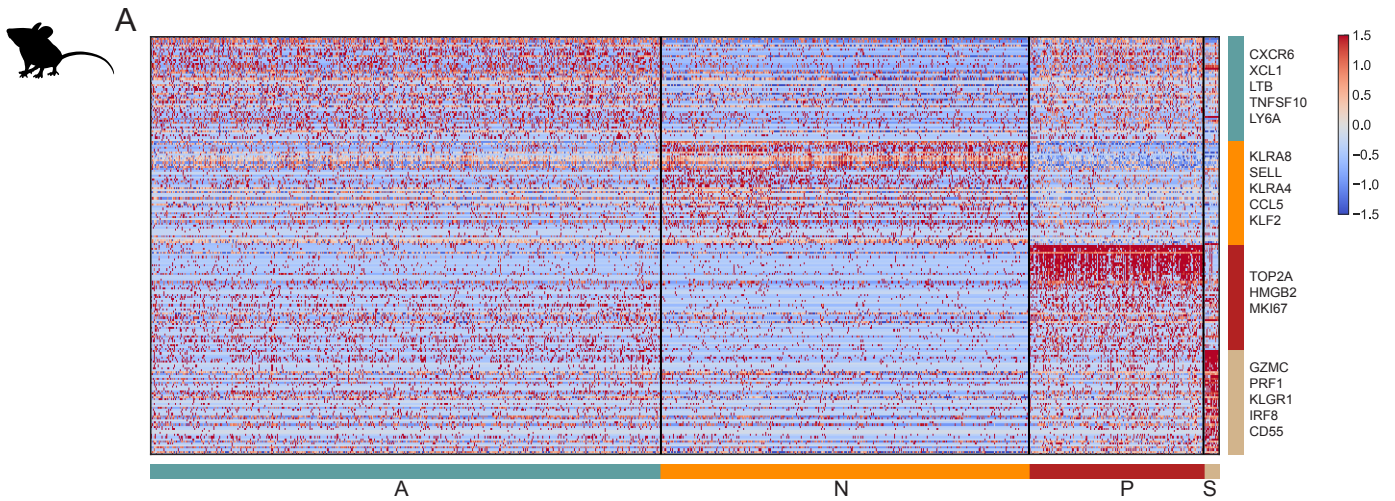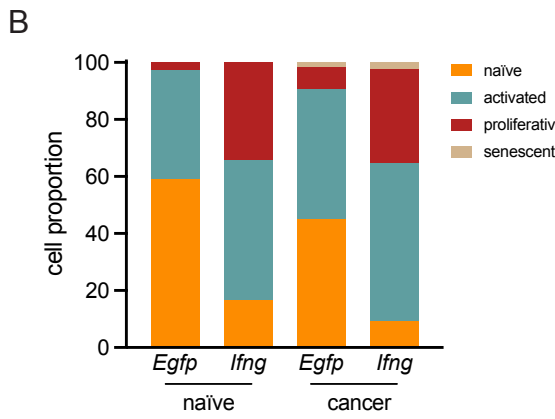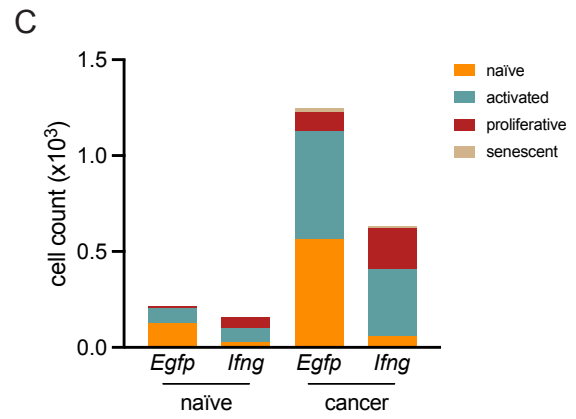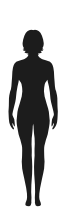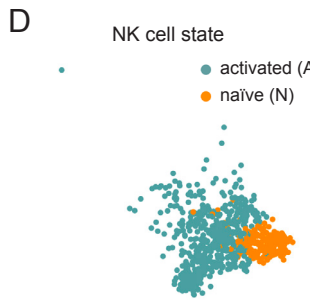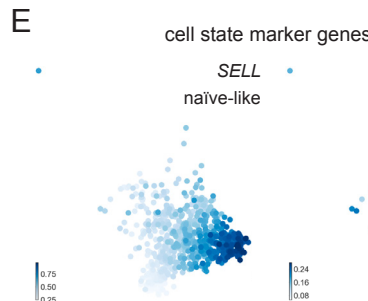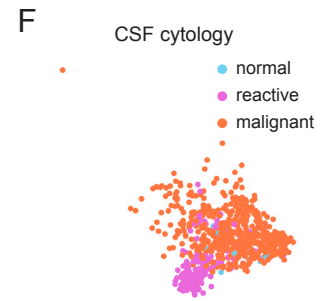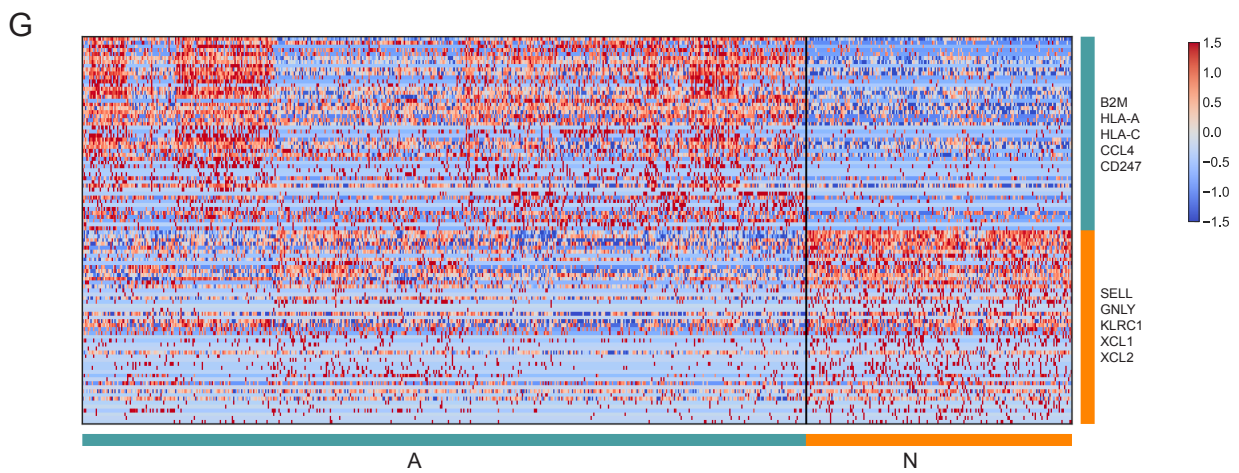

446 **Fig. S19. Characterization of leptomeningeal NK cells.**

447

448 (A) Heatmap showing scaled, zero-centered expression of top 50 genes *per* mouse NK cell  
449 state (one state vs. the rest; n = 2,247 cells total). Mouse NK cells were subsetted from 'NK cell'  
450 and 'Proliferative T/NK cell' clusters (Fig. 2B) based on the expression of Nk1.1 (cell surface)  
451 and *NKG7* (gene), and the lack of CD3 and TCR $\beta$  (cell surface). Naïve mouse NK cells are  
452 characterized based on single-cell RNA- and CITE-seq as CD62L<sup>high</sup>, activated NK cells are  
453 CD62L<sup>low</sup>, proliferative NK cells are CD62L<sup>low</sup> *MKI67*<sup>+</sup>, and senescent NK cells are CD55<sup>+</sup>  
454 KLGR1<sup>+</sup>. See also Fig. 5 and Methods.

455

456 (B) Proportion of NK cell states in naïve and metastasis-bearing, *Egfp*- or *Ifng*-overexpressing  
457 mice.

458

459 (C) Cell counts of NK cell states in naïve and metastasis-bearing, *Egfp*- or *Ifng*-overexpressing  
460 mice.

461

462 (D) UMAP showing NK cell states in human CSF (n = 763 cells); *NKG7*<sup>+</sup> NK cell cluster from  
463 Fig. 1B was subsetted.

464

465 (E) Projection of mouse naïve-like NK marker *SELL* (CD62L) and activated-like marker *CXCR6*  
466 onto human NK cells (MAGIC-imputed counts are plotted).

467

468 (F) CSF cytology classification of human NK cells.

469

470 (G) Heatmap showing scaled, zero-centered expression of top 50 genes *per* human NK cell  
471 state (one state vs. the rest).

472

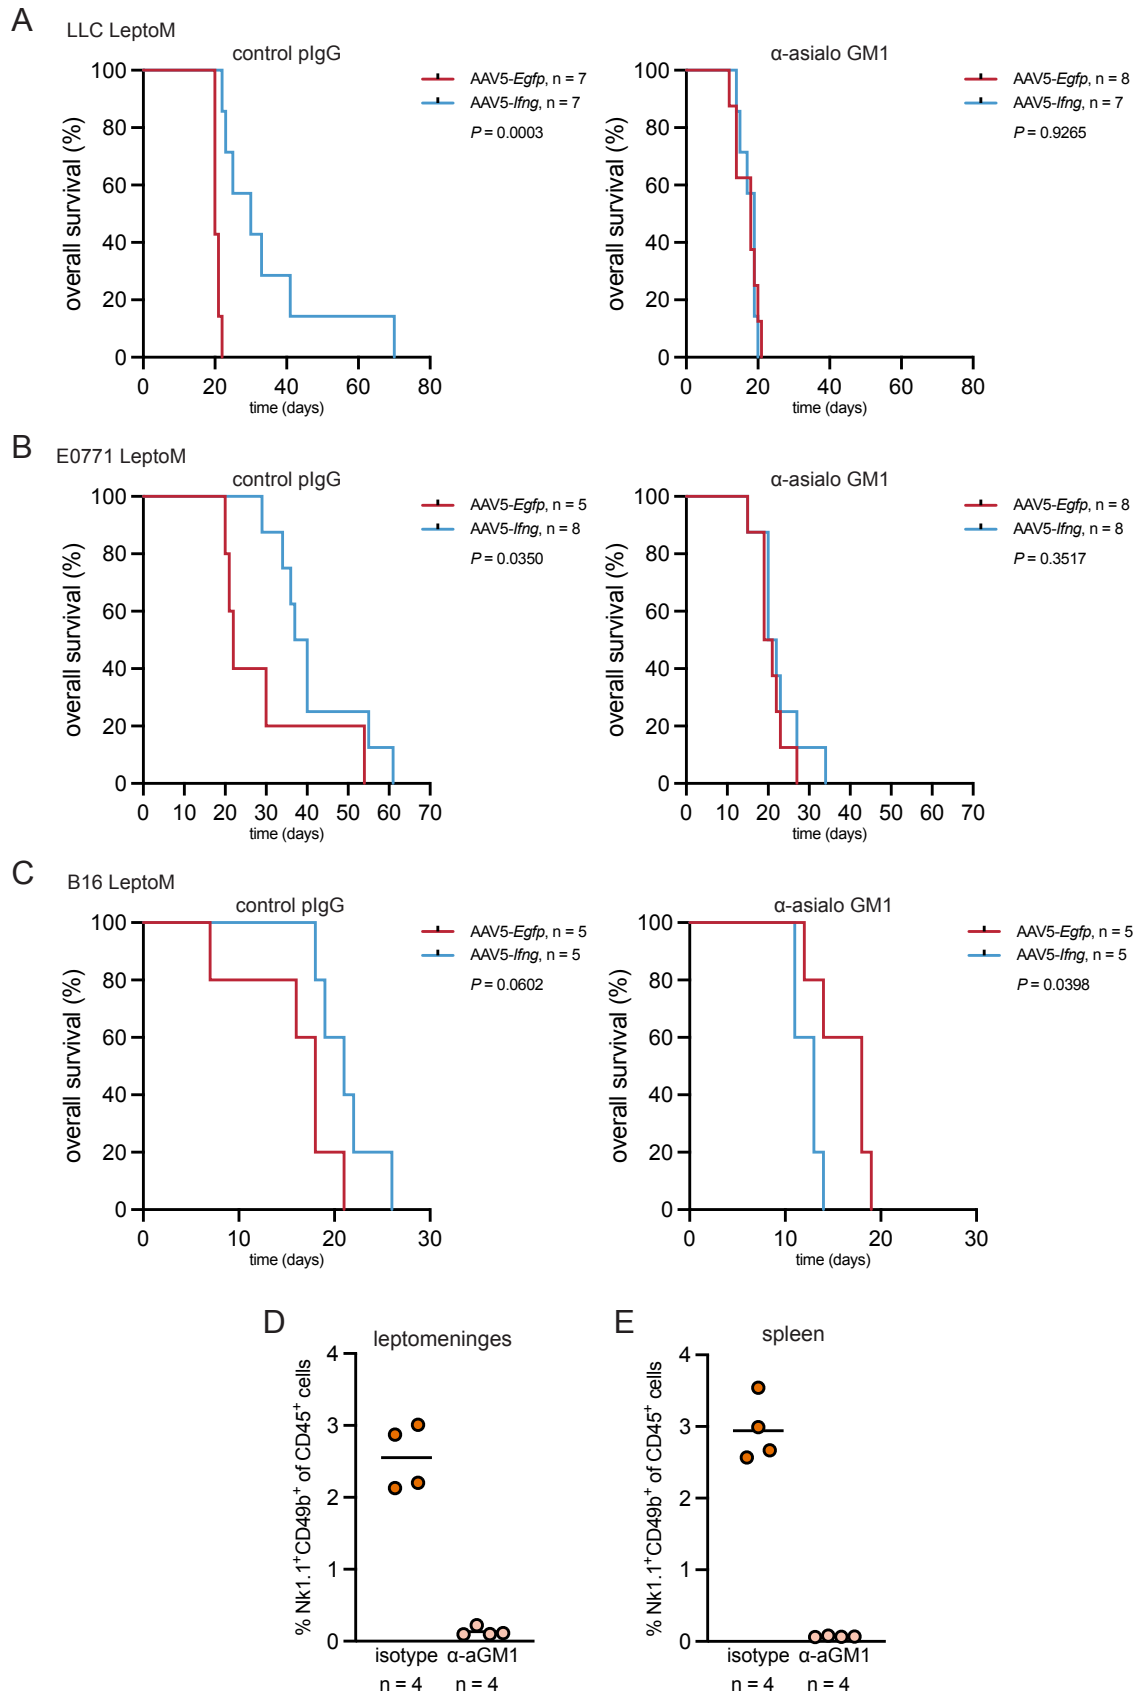

473 **Fig. S20. NK cells are the downstream cytotoxic effectors of leptomeningeal IFN- $\gamma$ .**

474

475 **(A)** Kaplan-Meier plot showing survival of LLC LeptoM-bearing C57Bl/6-*Tyr<sup>c-2</sup>* animals  
476 overexpressing *Egfp* or *Ifng* in the leptomeninges, depleted with control polyclonal antibody (left  
477 graph) or antibody targeting asialo-GM1 (logrank test).

478

479 **(B)** Kaplan-Meier plot showing survival of E0771 LeptoM-bearing C57Bl/6-*Tyr<sup>c-2</sup>* animals  
480 overexpressing *Egfp* or *Ifng* in the leptomeninges, depleted with control polyclonal antibody (left  
481 graph) or antibody targeting asialo-GM1 (logrank test).

482

483 **(C)** Kaplan-Meier plot showing survival of B16 LeptoM-bearing C57Bl/6 animals overexpressing  
484 *Egfp* or *Ifng* in the leptomeninges, depleted with control polyclonal antibody (left graph) or  
485 antibody targeting asialo-GM1 in one experiment (logrank test).

486

487 **(D)** Efficiency of systemic asialo-GM1-targeting depletion of NK cells in naïve C57Bl/6 animals,  
488 quantified in leptomeninges with flow cytometry.

489

490 **(E)** Efficiency of systemic asialo-GM1-targeting depletion of NK cells in naïve C57Bl/6 animals,  
491 quantified in spleen with flow cytometry.
